1  
2  
3  
4  
5  
6  
7  
8  
9  
10  
11  
12  
13  
14  
15  
16  
17  
18  
19  
20  
21  
22  
23  
24  
25  
26  
27  
28  
29  
30  
31  
32  
33  
34  
35  
36  
37  
38  
39  
40  
41  
42  
43  
44  
45  
46

**Meta-organization of Translation Centers Revealed by  
Proximity Mapping of Endoplasmic Reticulum Ribosome Interactors**

Alyson M. Hoffman<sup>1</sup> and Christopher V. Nicchitta<sup>1,2\*</sup>  
Departments of Biochemistry<sup>1</sup> and Cell Biology<sup>2</sup>  
Duke University School of Medicine  
Durham, North Carolina, 27710 USA

\* To whom correspondence should be addressed:

E-mail: [christopher.nicchitta@duke.edu](mailto:christopher.nicchitta@duke.edu)

Phone: (919) 684-8948

Fax: (919) 684-5481

47 **Abstract:**

48 The endoplasmic reticulum (ER) is a nexus for mRNA localization and translation; the  
49 molecular organization of these processes remains however largely undefined. To gain  
50 insight into mechanisms supporting a diverse ER translational landscape, we utilized  
51 BiID labeling to study the protein neighborhoods of the Sec61 translocon, specifically  
52 Sec61 $\beta$ , an established ribosome interactor, and ER proteins (Ribophorin I, LRRC59, and  
53 Sec62) previously implicated in ribosome association. Divergent protein interactomes  
54 enriched for distinct GO functions were identified for the four reporters, within a cohort of  
55 shared interactors. Efficient BiID tagging of ribosomes was only observed for the Sec61 $\beta$   
56 and LRRC59 reporters. RNA-seq analyses of the Sec61 $\beta$ - and LRRC59-labeled  
57 ribosomes revealed divergent enrichments in mRNAs and identified a transcriptome-wide  
58 role for the ER in proteome expression. These data provide evidence for a mesoscale  
59 organization of the ER and suggest that such organization provides a mechanism for the  
60 diversity of translation on the ER.

61

62

63

64

65 **Introduction:**

66  
67 The endoplasmic reticulum (ER) is a highly heterogeneous organelle composed of both  
68 rough and smooth membrane domains, distinguished by the presence or absence of  
69 bound ribosomes, a contiguous sheet and tubular membrane organization, and a diversity  
70 of primary cellular functions including secretory/membrane protein biogenesis, lipid  
71 biosynthesis, and calcium storage (English & Voeltz, 2013; Fawcett, 1966; Lynes &  
72 Simmen, 2011; Schwarz & Blower, 2016). In addition to these defining features , the ER  
73 engages in membrane-membrane communication with different organelles, including  
74 mitochondria, endosomes, and the plasma membrane (English & Voeltz, 2013; Helle et  
75 al., 2013; Valm et al., 2017). The sites of organelle–ER communication are marked by  
76 multi-protein assemblies that define areas of regional specialization, e.g., mitochondrial-  
77 associated membranes (MAMs), and provide evidence for the spatial organization of the  
78 membrane proteome as a biochemical/biophysical mechanism to accommodate the  
79 various structural and functional properties of this critical organelle (de Brito & Scorrano,  
80 2010; Hung et al., 2017; Jing et al., 2015; Vance, 2014).

81  
82 In addition to a dedicated function in secretory/membrane protein biogenesis, recent and  
83 past studies examining the subcellular distribution of mRNAs between the cytosol and ER  
84 compartments have revealed a transcriptome-wide role for the ER in proteome  
85 expression (Mueckler and Pitot 1981; Diehn et al. 2000; Diehn et al. 2006; Stephens and  
86 Nicchitta 2008; Jan, Williams, and Weissman 2014; Chartron, Hunt, and Frydman 2016;  
87 Voigt et al. 2017; Reid and Nicchitta 2012). The high enrichment in ER localization and  
88 translation of secretory/membrane protein-encoding mRNAs further validates the

89 established function of the ER in secretory and membrane protein biogenesis (Reid and  
90 Nicchitta 2012; Jan, Williams, and Weissman 2014; Chartron, Hunt, and Frydman 2016).  
91 An unexpected yet consistent finding in these studies is the comparatively modest  
92 enrichment of cytosolic mRNAs on free, cytosolic ribosomes (Reid and Nicchitta 2012;  
93 Jan, Williams, and Weissman 2014; Chartron, Hunt, and Frydman 2016). Given that  
94 eukaryotic transcriptomes are substantially weighted to cytosolic protein-encoding  
95 mRNAs, such modest enrichments indicate a broad representation of these mRNAs on  
96 the ER and suggest a global role for the ER in transcriptome expression (Diehn et al.,  
97 2006; Mueckler & Pitot, 1981; Reid & Nicchitta, 2015; Voigt et al., 2017). Although a  
98 function for the ER in the translation of cytosolic protein-encoding mRNAs has been under  
99 investigation for many decades, more recent biochemical and structural biology studies  
100 of the ribosome-Sec61 translocon, composed of Sec61 $\alpha$ , Sec61 $\beta$  and Sec61 $\gamma$  subunits,  
101 would suggest that such a function is unlikely (Becker et al., 2009; Pfeffer et al., 2014,  
102 2015; Prinz, Behrens, Rapoport, Hartmann, & Kalies, 2000; Schaletzky & Rapoport, 2006;  
103 Voorhees, Fernández, Scheres, & Hegde, 2014). The Sec61 translocon serves as a  
104 ribosome receptor and translocation channel, where the ribosomal protein exit channel  
105 resides in close physical apposition to the translocon channel entrance site. Thus, Sec61  
106 translocon-associated ribosomes are presumed to be dedicated to the translation of  
107 secretory and membrane protein-encoding mRNAs. Recent work supports additional  
108 mechanisms of supporting ER-localized translation, where translation of cytosolic protein-  
109 encoding mRNAs on the ER could be accommodated by Sec61 translocon-independent  
110 ribosome association mechanisms (Cui, Zhang, and Palazzo 2012; Voigt et al. 2017; Reid  
111 and Nicchitta 2012; Stephens and Nicchitta 2008; Potter and Nicchitta 2000). In support

112 of this view, a number of ER resident membrane proteins other than the Sec61 translocon  
113 have been proposed to function as ribosome receptors, including the  
114 oligosacharyltransferase (OST) subunit Ribophorin I, LRRC59 (p34), and p180 (RRBP1)  
115 (Harada, Li, Li, & Lennarz, 2009; Kreibich, Freienstein, Pereyra, Ulrich, & Sabatini, 1978;  
116 Savitz & Meyer, 1990; Tazawa et al., 1991). Although these proposed ribosome receptors  
117 have been shown to display high binding affinity to ribosomes *in vitro*, very little is known  
118 regarding the potential diversity of ribosome-ER protein interactions *in vivo*.

119  
120 Here we utilized BioID *in vivo* proximity mapping as a means to investigate the  
121 interactomes of a subset of proposed ribosome receptors. These data revealed a higher  
122 order (mesoscale) organization of the ER, where the BioID reporters reside in stable  
123 protein environments with clear GO functional enrichments, consistent with the  
124 organization of the ER membrane into discrete translation centers. Of the four candidates  
125 examined, only two, Sec61 $\beta$  and LRRC59, efficiently labeled ER-bound ribosomes.  
126 Intriguingly, RNA-seq analysis of ribosomes from the two distinct sites revealed both  
127 enriched and shared transcriptome cohorts. These data are consistent with a higher  
128 order organization of the translation functions of the ER into translation centers, which we  
129 define as enriched assemblies of interacting proteins, associated ribosomes, and bound  
130 mRNAs. In addition, these data suggest mechanisms whereby the ER could serve a  
131 broad role in proteome expression.

132 **Results:**

133 **Experimental Overview:**

134 Recent reports identify a transcriptome-wide function for ER-associated ribosomes in  
135 proteome expression (Reid and Nicchitta 2012; Voigt et al. 2017; Jan, Williams, and  
136 Weissman 2014; Chartron, Hunt, and Frydman 2016). Given the central role of the Sec61  
137 translocon as both the protein-conducting channel and ribosome receptor for membrane  
138 and secretory proteins (Gorlich, Prehn, Hartmann, Kalies, & Rapoport, 1992; Voorhees  
139 et al., 2014), we postulated that ER membrane proteins other than the Sec61 translocon  
140 participate in ribosome-ER interactions, as a mechanism to support transcriptome  
141 expression on the ER (Pfeffer et al., 2015; Reid & Nicchitta, 2015; Voorhees et al., 2014).  
142 To test this hypothesis, we used a BioID proximity labeling approach, where BioID  
143 chimera of known or proposed ribosome interacting proteins were used to map both ER  
144 protein-ribosome and proximal ER membrane protein interactions (**Figure 1A,B**). Briefly,  
145 BioID uses a mutant bacterial biotin ligase (BirA\*) that releases an unstable, amine-  
146 reactive biotin intermediate (biotin-AMP) from the active site; biotin-AMP can then react  
147 with near-neighbor proteins and thus provide *in vivo* protein-protein spatial interaction  
148 information (Roux, Kim, Raida, & Burke, 2012). As schematically illustrated in **Figure 1A**,  
149 ER membrane protein-BioID chimera constructs were engineered, inducible HEK293 Flp-  
150 In cell lines generated, and interactomes studied by biotin addition followed by subcellular  
151 fractionation and proteomic analyses of biotin-tagged proteins. As noted above, prior  
152 studies have established the Sec61 translocon as a ribosome receptor and so Sec61 $\beta$ -  
153 BioID was selected to report on the Sec61 translocon interactome (Deshaies, Sanders,  
154 Feldheim, & Schekman, 1991; Levy, Wiedmann, & Kreibich, 2001; Pfeffer et al., 2015).

155 Ribophorin I, a component of the OST, is vicinal to translocating nascent chains, has been  
156 proposed to function as a ribosome receptor, and was found to be a Sec61 translocon  
157 interactor, thus complementing the Sec61 $\beta$ -BioID interactome screen (Harada et al.,  
158 2009; Kreibich et al., 1978; Wild et al., 2018). Sec62, though relatively unstudied in  
159 mammalian systems, is orthologous to yeast Sec62, which participates in post-  
160 translational translocation, and in mammalian systems has been demonstrated to function  
161 in ribosome binding, with binding interactions mapped to regions adjacent to the ribosome  
162 exit tunnel (Lang et al., 2012; Müller et al., 2010). LRRC59, also relatively unstudied, was  
163 identified as a ribosome binding protein through biochemical reconstitution approaches  
164 and chemical crosslinking, where it was demonstrated to reside near large ribosomal  
165 subunits (Ichimura et al., 1993; Tazawa et al., 1991). An *in vivo* function for LRRC59 in  
166 ribosome binding has not been established, although anti-LRRC59 IgG and Fab inhibit  
167 ribosome binding and protein translocation *in vitro* (Ichimura et al., 1993). These four  
168 proteins were chosen as belonging to both well-studied complexes, e.g., Sec61 $\beta$  and  
169 Ribophorin I, and little studied proteins lacking a defined function in mammalian cells,  
170 e.g., LRRC59 and Sec62, to provide an expanded understanding of the molecular  
171 organization of the ER.

172

173 **Ribosome Interactor-BioID Chimera are ER-Localized and Predominately Label ER**

174 **Membrane Proteins.** To assess the subcellular localization and proximity labeling activity

175 of the ribosome interactor-BioID chimera introduced above, reporter cell lines were

176 induced for 16 hours with biotin supplementation and the subcellular reporter expression

177 patterns determined by immunofluorescence, using antisera directed against BirA, with

178 biotin labeling patterns examined by staining with a streptavidin-AF647 conjugate (**Figure**  
179 **2A**). A cell line containing the cloning vector backbone served as a negative control in  
180 this analysis (empty vector). As depicted in **Figure 2 A and B**, all four reporter cell lines  
181 displayed clear perinuclear reticular staining with the BirA antisera, consistent with an ER  
182 localization for all BiolD chimera. Ribophorin I and Sec61 $\beta$  are subunits of oligomeric  
183 protein complexes; to ensure correct localization of these chimeras we also compared  
184 the hydrodynamic behavior of the BirA\* chimera with the respective natively expressed  
185 proteins in the engineered BiolD and empty vector cell lines by glycerol gradient velocity  
186 sedimentation (Nikonov, Snapp, Lippincott-Schwartz, & Kreibich, 2002)(**Figure 2 – figure**  
187 **supplement 1**). The sedimentation patterns of all BiolD reporters and respective native  
188 proteins were similar to those of the empty vector-engineered cell lines and with  
189 sedimentation velocities consistent with their estimated complex sizes, suggesting that  
190 the chimera were appropriately assembled into native complexes (Harada et al., 2009).  
191 In yeast, such chimera complement genomic deletions of the parent gene, also indicative  
192 of native-like function (Jan, Williams, and Weissman 2014).

193

194 Intriguingly, streptavidin staining of proximal biotin labeled targets co-localized with the  
195 BirA staining patterns, suggesting that the primary interactomes are largely confined to  
196 the ER (**Figure 2A,B**). These findings were further validated in studies comparing the  
197 streptavidin staining patterns with the resident ER membrane protein TRAP $\alpha$  (**Figure 2B**).  
198 As with the data depicted in **Figure 2A**, we observed extensive overlap of streptavidin  
199 staining pattern with that of the resident ER protein marker. Surprisingly, after 16 h of



200 induction/biotin labeling the biotin tagging pattern was highly restricted to the ER, with  
201 little discernible tagging of cytosolic proteins.

202

203 The immunofluorescence data (**Figure 2**) were further evaluated in cell fractionation  
204 studies of the BirA\* chimera and the biotin labeling patterns (**Figure 3**). Using a previously  
205 validated sequential detergent fractionation protocol (Jagannathan, Nwosu, & Nicchitta,  
206 2011; Stephens & Nicchitta, 2007), where the cytosol fraction is released upon addition  
207 of a digitonin-supplemented buffer and the membrane fraction subsequently recovered  
208 by addition of a NP40/sodium deoxycholate/high-salt buffer, BioID chimera distributions  
209 were assessed by SDS-PAGE/immunoblot analysis. These data are depicted in **Figure**  
210 **3** and demonstrate that all ER membrane protein reporters were wholly recovered in the  
211 membrane fraction (**M**) and displayed SDS-PAGE mobilities consistent with their  
212 predicted molecular weights. Mirroring the immunofluorescence data shown in **Figure 2A**  
213 **and B**, proximal protein biotin labeling was highly enriched in the membrane fractions (**M**)  
214 (**Figure 3B,C**, TRAP $\alpha$  as ER marker), with only modest labeling of cytosolic proteins (**C**)  
215 (**Figure 3B,C**,  $\beta$ -tubulin as cytosolic marker). Interestingly, the biotin labeling patterns of  
216 the membrane fractions were readily distinguishable from one another, suggesting that  
217 the ER protein-reporters reside in distinct protein neighborhoods. The relatively paucity  
218 of biotinylated cytosolic proteins, visualized by both immunofluorescence staining and  
219 direct biochemical analysis, was unexpected. Because the reactive biotin-AMP  
220 intermediate diffuses from the BirA\* active site to modify accessible lysine residues of  
221 proximal proteins (Choi-Rhee, Schulman, & Cronan, 2004), we expected that membrane  
222 and cytosolic proteins would be similarly accessible to modification. The bias to biotin-

223 conjugation of ER membrane proteins suggests that the labeling radius for the reactive  
224 biotin-AMP intermediate is highly restricted (Kim et al. 2014).

225

### 226 **Evidence for meso-organization of ER membrane protein assemblies.**

227 BioID proximity labeling experiments are typically conducted over many hours (Varnaité  
228 & MacNeill, 2016) (e.g. 16-24h), a reflection of the slow release kinetics of the reactive  
229 biotin-AMP catalytic intermediate from the BirA\* active site (Kwon & Beckett, 2000).  
230 Because this time scale is substantially slower than that of most cellular processes, the  
231 specificity of the labeling reaction is formally a concern (Rees, Li, Perrett, Lilley, &  
232 Jackson, 2015), though it has been demonstrated that neighboring proteins can be  
233 distinguished from random interactors by their higher relative labeling over non-specific  
234 controls (Rees et al. 2015; Kim et al. 2014; Roux et al. 2012; Ueda et al. 2015; Gupta et  
235 al. 2015). In the context of the experiments with ER membrane-localized BioID reporters,  
236 we were concerned that reporter diffusion in the constrained 2D environment of the ER  
237 membrane over such extended labeling times could confound identification of near-  
238 neighbor and interacting proteins. To address this concern, we examined the BioID  
239 reporter biotin labeling patterns as a function of labeling time. Our prediction was that the  
240 biotin labeling patterns would diversify as labeling times increased, a consequence of the  
241 expected random diffusion of the reporter chimera within the 2-D constraints of the ER  
242 membrane. The results of these experiments are shown in **Figure 4A**. Depicted are  
243 streptavidin blots of the cytosol and ER protein fractions from the four BioID reporter cell  
244 lines, sampled over a time course of 0–6 hours. Two observations are highlighted here.  
245 First, as noted above, the relatively enhanced labeling of membrane proteins (**M**) to

246 cytosolic proteins (**C**) is evident throughout the time course examined, with very modest  
247 levels of cytosolic protein labeling throughout the time course for all constructs. Second,  
248 contrary to our expectations, the membrane protein biotin labeling patterns did not  
249 substantially diversify over the labeling time course (**Figure 4A**). Rather, the labeling  
250 pattern intensified as labeling time increased. The biotin labeling patterns revealed by  
251 SDS-PAGE were further analyzed by densitometric analysis (**Figure 4A**), where it can be  
252 appreciated that the biotin labeling patterns intensify, but only modestly diversify, as a  
253 function of labeling time. These data suggest that the BioID interactomes comprise largely  
254 stable membrane protein assemblies (**Figure 4B**), rather than the presumed randomizing  
255 interactomes expected of diffusion-based interactions (**Figure 4B**) (Goyette & Gaus,  
256 2017; Kusumi et al., 2012; Kusumi, Suzuki, Kasai, Ritchie, & Fujiwara, 2011; Singer &  
257 Nicolson, 1972).

258

259 The data presented above (**Figure 4A**) are consistent with a model where the mobility of  
260 the BioID reporters is constrained (**Figure 4B**), perhaps reflecting mesoscale organization  
261 of the ER via biomolecular interactome networks, as has been extensively documented  
262 in the plasma membrane (Goyette & Gaus, 2017; Kusumi et al., 2012, 2011). We also  
263 considered that the labeling patterns could be influenced by either ER distribution biases  
264 (e.g., tubules vs. sheets) or protein-specific differences in reactivity to the biotin-AMP  
265 reactive intermediate. To examine these scenarios, we performed proximity labeling time  
266 course experiments using canine pancreas rough microsomes (RM), which lack the  
267 native topological structure of the ER, and a soluble, recombinant BirA\*. Using this  
268 system, the reactive intermediate was delivered in *trans* and accessible to the ER surface

269 by solution diffusion. The results of these experiments are shown in **Figure 5** and  
270 demonstrate that when accessible to RM proteins in *trans*, biotin labeling is pervasive and  
271 monotonic, with a diversity of proteins undergoing labeling and relative labeling intensities  
272 increasing as a function of labeling time (compare **Figure 5B** to **Figure 5D**). Combined,  
273 the data depicted in **Figures 4** and **5** indicate that these BirA\* chimera are restricted to  
274 protein interactome domains of the ER *in vivo*, as represented by the distinct labeling  
275 patterns identified in each cell line.

276

277 To gain molecular insight into the protein neighborhoods of the reporters, cell lines were  
278 supplemented with biotin for 3 hours, the time point at which labeling intensity was highest  
279 compared to background, as illustrated in **Figure 4**, and biotinylated proteins captured  
280 from membrane extracts by streptavidin-magnetic bead affinity isolation. Elution was  
281 performed by biotin competition at high pH to select against non-specific background,  
282 with protein composition determined by mass spectrometry of the eluted samples. A  
283 summary of the analysis schema is depicted in **Figure 6A**. In brief, spectral counts of  
284 proteins meeting high confidence (1% FDR) cutoffs were normalized to those of natively  
285 biotinylated proteins and the subset with enrichments of  $\geq 2.5$ -fold over an empty vector  
286 control were selected. For these, two categories were defined; “enriched”, displaying an  
287 enrichment of  $> 2$ -fold over the combined normalized value, and “shared”, for those below  
288 this selection threshold. For all reporters, the majority of the labeled proteins meeting  
289 initial significance criteria were membrane proteins, corroborating the data presented in  
290 **Figures 2-4**. In the shared category, representing those proteins that met selection  
291 criteria and were present at similar normalized levels in two or more reporter datasets,

292 about 80% were membrane proteins, 10% were cytoplasmic proteins, and 10% were  
293 nuclear proteins. Within the shared membrane protein category, a number of prominent  
294 ER resident membrane proteins were identified in the reporter datasets and included  
295 signal peptidase complex subunit 2, the eIF2 $\alpha$  kinase PERK, DNAJC1, the ERAD-  
296 associated E3 ubiquitin ligase TRIM13, ERGIC-53, ER calcium ATPase 2, and reticulon-  
297 4. Other prominent ER resident proteins present in at least 3 of the 4 reporter datasets  
298 included Sec63 homolog, calnexin, and NADPH cytochrome P450. With respect to the  
299 enriched datasets, the candidate ribosome interactors LRRC59 and Ribophorin I returned  
300 identical numbers of neighboring/candidate interacting proteins (35), with Sec61 $\beta$   
301 returning 19 enriched hits, and Sec62 11 enriched hits; these specific interactomes are  
302 discussed further below. In summary, proteomic analysis of the neighboring proteins for  
303 the indicated BioID chimera revealed a high enrichment in ER membrane proteins and  
304 within this category, proteins with established functions in canonical rough ER functions  
305 such as protein translocation/protein processing, the unfolded protein response (UPR),  
306 and ER-associated protein degradation (Cross, Sinning, Luirink, & High, 2009; Gardner,  
307 Pincus, Gotthardt, Gallagher, & Walter, 2013; Hayashi-Nishino et al., 2009; Vembar &  
308 Brodsky, 2008).

### 309 **Candidate Ribosome Interactors Reside In Distinct ER-Protein Neighborhoods**

310  
311  
312 To further evaluate the subsets of neighboring proteins scoring in the enriched category,  
313 the datasets were visualized in Cytoscape (Shannon et al., 2003), cross-referenced via  
314 the STRING Protein-Protein Interaction Network resource (Szklarczyk et al., 2017), and  
315 functional enrichments for each reporter neighborhood determined by GO analysis. For

316 clarity, the Cytoscape-generated plots depicted in **Figure 7** include the top enriched hits,  
317 with screened, shared interactors included as **Figure 8A-B**. The plots provided in **Figure**  
318 **7** are coded to illustrate interactions with soluble proteins (yellow border) and membrane  
319 proteins (turquoise border). Centered and uncolored nodes indicate the chimera protein  
320 from each cell line and reporter spokes identify candidate interactor or near neighbor  
321 proteins. Direct protein-protein interactions that have been previously experimentally  
322 demonstrated via STRING annotation are represented by additional edges between  
323 colored nodes and, in the cases of Sec61 $\beta$  and Ribophorin I, green nodes for members  
324 of their native heterooligomeric complexes, which serve as important internal controls.  
325 Dark blue nodes and green nodes with asterisks by the gene name are proteins  
326 comprising the top GO category indicated underneath each plot and in the included table  
327 at the bottom of the figure. For Sec61 $\beta$  (**Figure 7**), a prominent interactor was Sec61 $\alpha$ ,  
328 as would be expected if the reporter was assembled into the native Sec61 translocon.  
329 The enriched BioID neighborhood set for Sec61 $\beta$  also included membrane biogenesis  
330 enzymes, e.g., the stearoyl desaturase SCD, the IP<sub>3</sub> receptor/calcium channel ITPR3,  
331 and the calcium ATPase ATP2B1. GO analysis of the enriched Sec61 $\beta$  BioID interactome  
332 set yielded the category “organelle membrane” as a high probability functional gene set.  
333 The enriched interactome set for Ribophorin I (RPN1 in figures) (**Figure 7**) includes  
334 STT3A, STT3B, and RPN2, (subunits of the OST complex), accessory components of the  
335 translocation machinery, such as SSR1, the IP<sub>3</sub> receptor/calcium channel ITPR2, and the  
336 stearoyltransferase SOAT1. GO analysis of the enriched ribophorin I BioID interactome  
337 set yielded the category “transport” as a high probability functional gene set. The LRRC59  
338 (**Figure 7**) enriched interactome was particularly interesting as it included ER membrane

339 proteins either predicted or demonstrated to function as RNA binding proteins, including  
340 MTDH (AEG-1), RRBP1 (p180), and CKAP4, as well as SRP68 (68 kDa subunit of the  
341 signal recognition particle) (Castello et al., 2012, 2016; Hentze, Castello, Schwarzl, &  
342 Preiss, 2018). This functional enrichment is consistent with recently published work  
343 demonstrating a function for AEG-1 and RRBP1 in RNA anchoring to the ER, and  
344 implicate LRRC59 in translational regulation on the ER (Hsu et al. 2018; Cui, Zhang, and  
345 Palazzo 2012; Ueno et al. 2012); the GO category “poly(A)RNA-binding” reflects this  
346 enrichment. The Sec62 BioID chimera dataset contained very few proteins that met the  
347 “enriched” cutoff criteria, with the few that did representing likely false positives (ER  
348 luminal and mitochondrial matrix proteins) (see supplementary proteomic data  
349 set)(**Figure 8B**). Also, and whereas we predicted Sec63 in the Sec62 dataset, Sec63  
350 appeared similarly labeled in the LRRC59 and Sec61 $\beta$  datasets and by selection criteria  
351 is shared (**Figure 8B**).

352

353 The binning scheme (“enriched” and “shared”) is useful for highlighting near-neighbor  
354 interactions and their functional enrichments. As noted, however, the proteomics dataset  
355 also revealed crosstalk between the BioID chimera and the wild-type candidate ribosome  
356 interacting proteins, though these interactions were not above the high stringency cutoff  
357 used to define near proximity interactions. The Cytoscape plot illustrated in **Figure 8A**  
358 depicts these lower threshold interactions, with the reporter nodes illustrated in yellow,  
359 green and dark red, representing Sec61 $\beta$ , LRRC59, and Ribophorin I, respectively, with  
360 the remaining “shared” dataset illustrated in **Figure 8B**. In summary, mass spectrometric  
361 analysis of the protein neighborhoods/interactomes identified by the BioID method

362 confirm that for two of the candidate ribosome interactors, Sec61 $\beta$  and Ribophorin I, the  
363 reporter chimera reside in proximity to their established native oligomeric complexes and  
364 intriguingly, three of the chimera reveal distinct protein neighborhoods whose residents  
365 are enriched for different ER functions, notably poly(A)RNA-binding (LRRC59), while  
366 sharing numerous ER resident proteins functioning in protein biogenesis and other  
367 ancillary ER functions (e.g., lipid synthesis and calcium transport).

368

### 369 **Proximity Labeling of ER-Bound Ribosomes by Candidate Ribosome Interactors**

370 In our initial mass spectrometric screens of candidate ribosome interacting proteins,  
371 biotinylated ribosomal proteins were largely absent from the datasets, which we  
372 subsequently determined reflected inefficient elution of densely biotinylated proteins from  
373 the Neutravidin beads. In addition, whereas we had presumed that ribosomal proteins,  
374 being highly basic and lysine-rich, would be very receptive to BioID labeling, SDS-PAGE  
375 analyses of ER-derived biotinylated ribosomes revealed that only a small subset of  
376 ribosomal proteins were targets for BioID labeling (**Figure 9**). As an alternative analytical  
377 strategy for analyzing candidate ribosomal proteins labeled via the BioID method, we  
378 conducted labeling experiments as above but first enriched for the ribosome fraction by  
379 ultracentrifugation and analyzed ribosome BioID patterns separately.

380

381 The Sec61 $\beta$  BioID reporter, being a subunit of the Sec61 translocon, was found to  
382 efficiently label ER-bound ribosomes, as was the LRRC59 reporter, though itself not a  
383 translocon subunit (**Figure 9**, 6 hr time points). Ribosome labeling was not observed at  
384 the shorter labeling periods for the Ribophorin I BioID chimera, or at any of the time points



385 examined for the Sec62 BioID chimera (**Figure 9**), though both have been previously  
386 reported to bind ribosomes *in vitro* (Harada et al., 2009; Müller et al., 2010). As we report  
387 above for the protein interactomes, the restricted ribosome BioID labeling patterns we  
388 observed are suggestive of a high degree of spatial organization and stability. Negative  
389 data must be interpreted with caution, however. In the case of the Ribophorin I reporter,  
390 the ribosome-OST interaction may be too short lived for efficient labeling. Consistent with  
391 this interpretation, recent cryoEM studies of ER microsomes have reported two distinct  
392 Sec61 translocon environments distinguished by the presence or absence of OST, where  
393 it is noted that OST recruitment to the translocon may be transient, being present for the  
394 brief interval of N-linked sugar addition (Pfeffer et al., 2015; Wild et al., 2018). In addition  
395 and/or alternatively, the Ribophorin I chimera may be compromised in its ability to  
396 associate with the Sec61 translocon and thus to report on translocon-bound ribosomes  
397 (Braunger et al. 2018).

398  
399 For the same rationale used in the studies of near-neighbor protein-protein interactions  
400 (**Figure 4**), we performed time course studies of ribosome labeling, and examined labeled  
401 ribosome distributions in the cytosol and ER compartments (**Figure 9**). As shown, the  
402 distinct ribosome labeling patterns seen for the LRRC59 and Sec61 $\beta$  BioID reporters were  
403 evident within 0.5 to 1 hour of biotin addition, enriched in the ER-bound ribosome fraction,  
404 and with a small fraction of labeled ribosomes recovered in the cytosol. The labeling  
405 pattern and relative ratio of ER to cytosolic ribosome labeling, most evident in the LRRC59  
406 BioID reporter line, did not vary substantially over the 6 hour time course of the  
407 experiments (**Figure 9**). At present it is not known if the biotin-labeled cytosolic ribosomes

408 represent ribosomes that were labeled in the ER-bound state and subsequently  
409 exchanged to the cytosol, or if the BioID chimera labeled both free cytosolic and ER-  
410 bound ribosomes. That the ribosomal protein labeling patterns are nearly identical in the  
411 ribosomes from both compartments suggests the former. This phenomenon is currently  
412 under investigation. As in the experiments illustrated in **Figure 4**, the patterns evident at  
413 early time points intensified as a function of labeling time, but did not diversify, suggesting  
414 a highly restricted spatial orientation of the BioID reporter-ribosome interface. This  
415 phenomenon is further characterized in the analysis depicted in **Figure 9B**, which  
416 illustrates the kinetics of the summed signal intensities of the biotinylated ribosomal  
417 proteins, for all BioID reporters. Notably, the ribosomal protein labeling kinetics of the  
418 LRRC59 and Sec61 $\beta$  BioID reporters are similar, suggesting that the two reporters  
419 undergo similar near-neighbor lifetime interactions with membrane-bound ribosomes.

420

421 To assess the functional impact of LRRC59 and Sec61 $\beta$  BioID reporter-mediated  
422 biotinylation on ribosome function, sucrose gradient sedimentation experiments were  
423 performed (**Figure 10A**). The data in **Figure 10B and C** reveal the presence of  
424 biotinylated ribosomal proteins in the subunit (**Figure 10B**) and polysome (**Figure 10C**)  
425 fractions, where subunit identification was confirmed by sucrose gradient centrifugation  
426 and RNA gel analysis of 18S and 28S rRNA distributions, demonstrating that for both  
427 reporters, biotin-labeled ribosomes are functionally engaged in translation. The abundant  
428 biotin labeling present in the proteins at the top of the gradients represents the ER  
429 membrane proteins present in the detergent extracts. These data indicate that LRRC59  
430 and Sec61 $\beta$  BioID-mediated biotin labeling did not compromise ribosome function.

431  
432 Mass spectrometric analysis of the on-bead digested ribosome fraction revealed a small  
433 subset of ribosomal proteins (**Figure 10A, 11**). Consistent with the overall streptavidin  
434 labeling patterns of gradient purified ribosomes, determined by streptavidin immunoblot  
435 analyses, both BioID reporters labeled a common set of ribosomal proteins: L7a, L14,  
436 L23a, and LA2 (not shown) whose locations on the ribosome, illustrated in **Figure 11A**  
437 are regionally clustered. Intriguingly, these shared proteins distribute in regions adjacent  
438 to the peptidyl transferase and nascent peptide exit site (Wilson & Doudna Cate, 2012).  
439 Two ribosomal proteins were highly enriched in only one dataset. RPL17, enriched in the  
440 Sec61 $\beta$  dataset, is located near the nascent chain exit site and has been demonstrated  
441 to serve important roles in transmembrane domain sensing and signaling to the peptidyl  
442 transferase, a function consistent with its appearance in the Sec61 $\beta$  interactome (Lin,  
443 Jongsma, Pool, & Johnson, 2011; Zhang, Wölfle, & Rospert, 2013). RPS3A, enriched in  
444 the LRRC59 dataset, is located near the mRNA exit site and has been shown to interact  
445 with the transcription factor CHOP (Cui et al. 2000). These data are consistent with  
446 cryoEM data depicting a specific and spatially constrained interaction between the  
447 ribosome and the translocon, of particular relevance to the Sec61 $\beta$  BioID reporter  
448 (Voorhees et al., 2014). The LRRC59 BioID reporter, which resides in an ER membrane  
449 neighborhood enriched in integral membrane RNA binding proteins, also resides in  
450 proximity to bound ribosomes, consistent with a function in coupling translating ribosomes  
451 to translocons (Reid & Nicchitta, 2015). These data place LRRC59 in an important ER  
452 locale with complementary enrichments in poly(A)RNA binding and translation. The  
453 precise role(s) performed by LRRC59 in this environment awaits further study.

454

455 **Domain-specific RNA-seq reveals regional mRNA enrichments and broad**  
456 **translation functions for ER-bound ribosomes.**

457 A primary objective of this study was to examine the translational landscape of the ER,  
458 using candidate ribosome interacting proteins as probes for identifying the composition,  
459 organization, and translation activities of ribosome-ER association sites. As noted above,  
460 we identified robust near-neighbor interactions between ER-bound ribosomes the  
461 translocon subunit Sec61 $\beta$ , and the candidate ribosome receptor LRRC59. Intriguingly,  
462 the membrane protein neighborhoods for the two bound ribosome interactors displayed  
463 divergent functional enrichments, consistent with functions in protein translocation and  
464 mRNA translation, respectively. To extend these findings to the translational status of  
465 these domains, biotin-tagged, ER-associated ribosomes were purified from the Sec61 $\beta$   
466 and LRRC59 BioID cell lines and the associated mRNAs identified by RNA-seq (**Figure**  
467 **12**). The experimental methodology is summarized in **Figure 12A**. Following the biotin  
468 labeling period, the cytosolic, free ribosome fraction was released via the sequential  
469 detergent extraction method noted above and the ER-bound ribosome fraction recovered  
470 by detergent solubilization of cytosol-depleted cells. The ribosome fraction was then  
471 separated from the co-solubilized membrane proteins by chromatography on Sephacryl  
472 S-400 gel filtration media. Biotinylated ribosomes, which are recovered in the S-400 void  
473 fractions, were isolated by avidin-magnetic bead capture, the total RNA fraction isolated,  
474 and cDNA libraries prepared for deep sequencing. To correct for background mRNA  
475 contributions, parallel isolations were performed with empty vector parental cell lines and  
476 cDNA libraries from these mock purifications deep sequenced in parallel.

477

478 In **Figure 12B**, mRNA subcellular category distributions in the shared, Sec61 $\beta$ -enriched,  
479 and LRRC59-enriched pools are illustrated. As expected, the ER-associated mRNA  
480 transcriptome (**Figure 12B**, Mem Fraction) differs substantially from the total cellular  
481 mRNA transcriptome, (**Figure 12B**, Total Cell) showing a substantial enrichment in  
482 secretory- and membrane protein-encoding transcripts. As previously reported, the ER-  
483 associated mRNA transcriptome contains a substantial representation of cytosolic  
484 protein-encoding mRNAs (Reid and Nicchitta 2012; Jan, Williams, and Weissman 2014;  
485 Chartron, Hunt, and Frydman 2016). This overall distribution is generally represented, per  
486 category, in the shared and Sec61 $\beta$ - and LRRC59-enriched categories, though with  
487 significant variations. These differences are further explored in **Figure 12C and D**, which  
488 depicts the TPM distributions of mRNA cohorts in the shared and enriched gene sets. As  
489 with the total ER-associated transcriptome, when expressed as a relative fraction of the  
490 total ER-associated mRNAs, the majority mRNA fraction in the shared category encodes  
491 cytosolic proteins (Reid & Nicchitta, 2012). As reported previously, and although relatively  
492 abundant and broadly ER-represented, this mRNA cohort is about 2-fold de-enriched  
493 relative to the cytosol resident fraction, similar to the fractional distributions reported in  
494 yeast and mammalian cell lines (Reid and Nicchitta 2012; Jan, Williams, and Weissman  
495 2014; Chartron, Hunt, and Frydman 2016). In comparison to the total ER-associated and  
496 reporter-enriched cohorts, the shared gene set has a somewhat higher representation of  
497 cytosolic protein-encoding mRNAs, indicating that in general, this cohort of mRNAs is not  
498 selected into either the Sec61 $\beta$  or LRRC59-translation domains. In contrast, membrane  
499 protein-encoding mRNAs are substantially enriched in both translation domains (**Figure**

500 **12C,D**). Furthermore, individual organelle categories showed unexpected and divergent  
501 enrichments. For example, the Sec61 $\beta$  translation domain is enriched for nuclear genes  
502 yet de-enriched for secreted genes. Intriguingly, the enriched gene sets for the two  
503 translation domains are divergent in mitochondrial genes, with the shared gene set being  
504 enriched in matrix (soluble) genes and the enriched sets in genes encoding mitochondrial  
505 membrane proteins. As with the cytosolic genes, these data indicate that mitochondrial  
506 matrix protein-encoding mRNAs are not selected into either of the translation domains  
507 whereas mitochondrial membrane protein-encoding mRNAs are. Furthermore, and quite  
508 unexpectedly, GO analysis of the mitochondrial genes in these categories revealed  
509 further specification, with the Sec61 $\beta$  translation domains being enriched for  
510 mitochondrial outer membrane protein genes and the LRRC59 translation domains being  
511 enriched for inner membrane electron transport membrane proteins (**Table 2**). Also  
512 displayed in **Tables 1,2** are the highest confidence GO term enrichments for the principal  
513 divergent gene sets, which demonstrate that the two examined translation domains  
514 display both specification, in the enriched gene sets, and generalization, in the shared  
515 gene sets.

516

517 At present, the molecular basis for such enrichments are unknown. Intriguingly, for both  
518 translation domains, one of the most enriched genes is the parent reporter gene. Thus,  
519 ribosomes engaged in the translation of the reporter reside in proximity to their translation  
520 product (**Figure 12F**). Such an intimate association may arise if the reporter parent genes  
521 encode or associate with an interacting RNA binding protein. Consistent with this view,

522 Sec61 $\beta$  has been identified as a poly(A) RNA binding protein (Baltz et al., 2012), and  
523 LRRC59 resides in an RNA binding protein-enriched domain (**Figure 7**).

524

525 In addition to the shared and divergent gene cohorts in coding mRNAs, discussed above,  
526 the sequencing data also revealed differences in non-coding mRNAs (**Figure 12E**). For  
527 the purposes of this study, we focused on the non-coding 7S RNA of the signal recognition  
528 particle (Walter & Blobel, 1982). 7S RNA is enriched over control in the BioID reporter  
529 translation domains, with a higher representation in the LRRC59 vs Sec61 $\beta$  translation  
530 domains. Consistent with the 7S RNA enrichment in the LRRC59 translation domain,  
531 SRP68, the 68kDa SRP protein subunit, was enriched in the LRRC59 proteomics dataset  
532 and serves as orthogonal validation for the enrichment of SRP in the two translation  
533 domains (**Figure 7 and 12E**). In summary, RNA-seq analyses of the mRNAs undergoing  
534 translation on ribosomes proximal to the Sec61 $\beta$  and LRRC59 BioID reporters revealed  
535 translational specialization, where specific GO category gene sets were enriched in the  
536 two domains, and shared translation functions, where numerous genes were common to  
537 the two translation domains. Most noteworthy were divergencies in enrichments for  
538 genes encoding mitochondrial matrix or membrane proteins, and “self” genes, where the  
539 two translation domains enrich for their respective self RNAs. Combined with the  
540 membrane protein proteomic data reported above, these data reveal a higher order meso-  
541 organization of the ER, with resident membrane proteins, ribosomes and mRNAs,  
542 displaying discrete and complementary enrichments, which is consistent with a model  
543 where the ER is comprised of both stable and interacting membrane domains functioning

544 as local translation sites and which can be engaged in the translation of enriched subsets  
545 of cytosolic and secretory/membrane protein-encoding RNAs.  
546



547 **Discussion:**

548 Here we report on the translational landscape of the ER from the perspective of candidate  
549 ribosome interacting proteins and their protein interactome networks. The rationale for  
550 this study is rooted in the growing number of reports demonstrating that cytosolic protein-  
551 encoding mRNAs undergo translation on ER-bound ribosomes. Indeed, recent analyses  
552 indicate that cytosolic protein-encoding mRNAs can comprise the majority of the  
553 translation activity of total ER-bound ribosomes (Reid and Nicchitta 2012; Jan, Williams,  
554 and Weissman 2014; Chartron, Hunt, and Frydman 2016). These reports raise a number  
555 of fundamental questions regarding mechanisms of RNA localization to the ER, the  
556 spatiotemporal regulation of ER-associated translation and in particular, and mechanisms  
557 of ribosome association and exchange on the ER *in vivo*, for which it is generally accepted  
558 that ribosome exchange on the ER are functionally linked to secretory/membrane protein  
559 synthesis (Hsu and Nicchitta 2018). An additional challenge is epistemological, where a  
560 dedicated role for the ER in the biogenesis of secretory and membrane proteins is well  
561 established, though the question of the exclusivity of this role has been raised for many  
562 decades and continues to be debated (Mueckler and Pitot 1981; Diehn et al. 2006; Reid  
563 and Nicchitta 2012; Reid and Nicchitta 2015; Jan, Williams, and Weissman 2015). Here  
564 we used an unbiased proximity labeling approach, BioID, to investigate the near-neighbor  
565 environments of both established and candidate ribosome-interacting ER membrane  
566 proteins, including Sec61 $\beta$ , a subunit of the Sec61 translocon, Ribophorin I, a subunit of  
567 the OST complex, which resides in proximity to the Sec61 translocon (Harada et al.,  
568 2009), and LRRC59 (p34), which displays ribosome binding activity *in vitro* (Tazawa et  
569 al., 1991). We draw three primary conclusions from these studies; i) the ribosome

570 interactors examined reside in stable, interactome-ordered ER membrane domains; ii)  
571 LRRC59 resides proximal to ER-bound ribosomes and thus likely contributes to the  
572 totality of ribosome association on the ER; and iii) the mRNA compositions of ribosomes  
573 residing in different membrane domains can be distinguished and comprise both  
574 selectively enriched as well as shared transcriptome cohorts. Combined, these data  
575 reveal a higher order organization of the ER, which we refer to as mesoscale organization  
576 by analogy to current understanding of the domain organization of the plasma membrane  
577 (Goyette & Gaus, 2017; Kusumi et al., 2012, 2011), and provide early experimental  
578 evidence for a “translation center-based” organization of the ER, where distinct ER  
579 domains may function in the coordinated biogenesis of functionally related proteins.

580

581 Two largely unexpected observations from this work were the findings that the near-  
582 neighbor environments of the different BiID reporter constructs did not diversify as a  
583 function of labeling time, and that the direct environments of the BiID reporters were  
584 heavily biased to ER membrane proteins. We had initially expected that given the 2-D  
585 constraints of the ER membrane, the reporter interactomes would diversify as a function  
586 of labeling time to reflect random diffusion in the 2-D plane of the ER membrane. To the  
587 contrary, their environments became more densely labeled over labeling time courses of  
588 many hours, with only a modest increase in labeling diversity. The remarkable stability of  
589 the protein labeling patterns is consistent with a domain model where diverse, low affinity  
590 interactions between functionally related proteins enable a mesoscale organization of the  
591 membrane. In support of this interpretation, GO analysis of the enriched sets of labeled  
592 proteins revealed distinct and functionally related gene categories. Importantly, those

593 BioID reporter chimera that are known to be subunits of oligomeric proteins (Sec61 $\beta$ ,  
594 Ribophorin I) tagged key subunits, Sec61 $\alpha$  in the case of Sec61 $\beta$  and both STT3A and  
595 STT3B in the case of Ribophorin I, indicating that the chimera assembled into native  
596 oligomers and thus reported on the environments of the oligomeric complexes. Although  
597 by analogy, extensive studies of plasma membrane architecture have provided strong  
598 evidence for mesoscale organization with roles for biophysical contributions from distinct  
599 lipid species and interactions with cytoskeletal components as important organizing  
600 determinants (Chiantia et al., 2008). Whether lipid species or cytoskeletal components  
601 contribute to ER membrane organization remains to be determined, though there is  
602 evidence for ceramide/sphingolipid domains in the ER as well as both microtubule and  
603 actin cytoskeleton interactions with ER resident proteins (Jagannathan et al., 2014;  
604 Ogawa-Goto et al., 2007; Savitz & Meyer, 1997).

605  
606 Another unexpected observation from this work was the strong biotin labeling bias to the  
607 ER membrane over cytosolic proteins. Given the diffusion-based mechanism of BioID  
608 labeling, we had expected significant labeling of both cytosolic and membrane proteins.  
609 While, the exact reason for this bias remains to be determined, we speculate that it  
610 reflects both high local concentrations of reactive sites and high residence lifetimes of ER  
611 membrane proteins proximal to the reporters, as contrasted with a soluble protein  
612 undergoing three-dimensional aqueous diffusion.

613  
614 A particularly intriguing observation from these studies is the finding that LRRC59 is near  
615 translating ribosomes. Although LRRC59 had been previously reported to function as a

616 ribosome binding protein *in vitro*, a function in ribosome association *in vivo* had not been  
617 demonstrated (Ichimura et al., 1993; Ohsumi et al., 1993; Tazawa et al., 1991). Indeed,  
618 after a decades long search for the ribosome receptor, which yielded the identification of  
619 the Ribophorins, LRRC59, p180, and Sec61, among others, research interest has largely  
620 focused on the Sec61 complex as the sole ribosome interacting ER protein (Gorlich et  
621 al., 1992; Kalies, Görlich, & Rapoport, 1994; Pfeffer et al., 2015; Voorhees et al., 2014).  
622 Indeed, substantial structural data supports this functional assignment, but do not exclude  
623 the possibility that additional ER proteins contribute to the totality of ribosome association  
624 with the ER (Blau et al., 2005; Müller et al., 2010; Shibatani, David, McCormack, Frueh,  
625 & Skach, 2005; Ueno et al., 2012; Wang & Stefanovic, 2014). In support of this conjecture,  
626 the BioID interactome for LRRC59 was highly enriched in proteins with candidate or  
627 established RNA binding activity, including MTDH (AEG-1), which we recently  
628 demonstrated to be an ER RNA binding protein enriched in membrane protein-encoding  
629 mRNAs (Hsu et al. 2018), p180, which has also been demonstrated to have a poly(A)RNA  
630 binding function, and CKAP4, which was identified as a candidate RNA binding protein in  
631 a number of recent studies (Cui, Zhang, and Palazzo 2012; Ueno et al. 2012; Castello et  
632 al. 2012). These findings suggest that LRRC59 may have a previously unrecognized role  
633 in coupling ER-associated translation to translocon engagement of the translation  
634 product. These data fit with a previously proposed model suggesting ribosome interacting  
635 proteins might diffuse in the ER membrane to allow nascent chain engagement with  
636 unoccupied translocons (Benedix et al., 2010; Johnson & van Waes, 1999; Reid &  
637 Nicchitta, 2015). The data in this report demonstrates that LRRC59 resides in proximity  
638 to ER-associated ribosomes and engages an interactome enriched in RNA binding

639 proteins suggesting previously unanticipated roles for this protein in translation on the  
640 ER.

641

642 Since two BioID reporter chimeras distinctly tagged ER membrane-bound ribosomes this  
643 provided an opportunity to investigate the transcriptome organization of the ER. As noted,  
644 a primary role for the ER in secretory/membrane protein biogenesis is very well  
645 established and both past and recent studies examining the subcellular distributions of  
646 mRNAs between the cytosol and ER compartments have strongly affirmed this role (Reid  
647 & Nicchitta, 2012; Voigt et al., 2017). Although the interpretation of these data has been  
648 debated, studies of mRNAs distributions between the cytosol and ER compartments in  
649 yeast, by ER localized BirA-AVI tag labeling or by SRP-directed immunoprecipitation,  
650 demonstrate that many cytosolic protein-encoding mRNAs display  $\log_2$  cytosol  
651 enrichments of  $< 1-2$ , and are thus substantially represented on the ER (Jan, Williams,  
652 and Weissman 2014; Chartron, Hunt, and Frydman 2016). This mRNA distribution is  
653 similar to data reported in mammalian cells (Reid & Nicchitta, 2012; Voigt et al., 2017). In  
654 the current study, we examined the associated transcriptomes of biotin-tagged, ER-bound  
655 ribosomes. As with earlier studies, we report that although enriched over the cell  
656 transcriptome in secretory/membrane protein-encoding mRNAs, ribosomes residing in  
657 proximity to both the Sec61 $\beta$  and LRRC59 BioID chimera contained a significant fraction  
658 of cytosolic protein-encoding mRNAs and their respective populations of biotin-tagged  
659 ribosomes displayed overlapping yet distinct biotin labeling patterns. The RNA  
660 populations for the two cell lines displayed both shared and enriched transcripts and, of  
661 high interest, the enriched transcript cohorts differed in GO enrichments, with the Sec61 $\beta$

662 cohort being enriched in mRNAs encoding ER proteins and the LRRC59 cohort being  
663 enriched in mRNAs encoding integral plasma membrane proteins. Particularly interesting  
664 was the finding that one of the most enriched transcripts for both reporters was the “self  
665 mRNA”. These findings support the concept of translation centers on the ER, where  
666 mRNAs encoding proteins of related function are coordinately translated in a coherent,  
667 localized manner. It remains to be determined how individual mRNAs are targeted to  
668 distinct sites or whether mRNAs may be directly recruited to such sites via binding  
669 interactions with ER RNA binding proteins such as AEG-1 or by stably associated  
670 ribosomes potentially with heterogeneous composition (Hsu et al. 2018; Mauro and  
671 Edelman 2002; Wu et al. 2016; Gilbert 2011; Shi et al. 2017).

672

673 In summary, we present both proteomic and transcriptomic data supporting the view that  
674 translation on the ER, and the ER membrane itself, is subject to mesoscale organization  
675 where cohorts of interacting proteins, ribosomes, and mRNAs, are enriched in distinct  
676 domain environments. We suggest that such a mechanism may provide for the efficient  
677 assembly of functionally related and/or interacting protein complexes. These data also  
678 provide additional evidence in support of a transcriptome-wide function for the ER in  
679 proteome expression. The remaining questions are many, but given emerging data on  
680 the higher order structural organization and translational organization of different regions  
681 and compartments of the cell, notably dendrites, mitochondria, stress granules, and P  
682 bodies, these data are consistent with higher organization of transcriptome expression  
683 and regulation as an evolutionarily conserved cellular strategy (Banani, Lee, Hyman, &

684 Rosen, 2017; English & Voeltz, 2013; Hudder, Nathanson, & Deutscher, 2003; Uezu et  
685 al., 2016; Vance, 2014; Youn et al., 2018).

686

687 **Materials and Methods**

688 **Generation of BioID Chimera**

689 Plasmids were from the following sources: pCMV-Sport6-RPN1 (Transomic ID: pCS6-  
 690 BC010839, TransOMIC, Huntsville, AL), pCMV-Sport6-LRRC59 (Transomic ID: pCS6-  
 691 BC017168), Sec61 $\beta$  (Transomic ID: pOTB7-BC BC001734), Neo-IRES-GFP-Sec62  
 692 (Richard Zimmerman, Saarland University, Homburg, Germany), pEYFP-N1-BirA\* (Scott  
 693 Soderling, Department of Cell Biology, Duke University Medical Center). Gibson  
 694 assembly master mix (NEB E2611S, Ipswich, MA) was used with the specified amplified  
 695 fragments using the primers below to generate all constructs with the indicated BirA\* tag  
 696 including a Gly-Ser-Gly-Ser linker between the protein of interest and BirA\*. All resulting  
 697 constructs were cloned into pcDNA5-FRT/TO for downstream generation of HEK293 Flp-  
 698 In T-REx cell lines (Thermo Fisher Scientific, Waltham, MA). The BioID tags were placed  
 699 on the terminus facing the cytosol, for Sec62 we chose the C-terminus to avoid disrupting  
 700 proposed ribosome interactions (Müller et al., 2010).

| Primer Name                 | Primer Sequence (5' to 3')                       |
|-----------------------------|--------------------------------------------------|
| Vector-RPN1-Fwd             | CTCTAGCGTTTTAACTTAAGCTTATGGAGGCGCCAGCCGCC        |
| RPN1-BirA*-Rev              | CCACTGCCAGGGCATCCAGGATGTGGTCG                    |
| RPN1-BirA*-Fwd              | ATGCCCTGGGCAGTGGCAGTAAGGACAACACCGTGCCC           |
| BirA*-Vector-Rev            | ATCCGAGCTCGGTACCTATGCGTAATCCGGTACATCG            |
| Vector-BirA*-Fwd            | CTCTAGCGTTTTAACTTAAGCTTATGAAGGACAACACCGTGC       |
| BirA*-LRRC59-Rev            | CCACTGCCCTCGAGCTTCTCTGCGCT                       |
| BirA*-LRRC59-Fwd            | AGCTCGAGGGCAGTGGCAGTACCAAGGCCGGTAGCAAG           |
| LRRC59-Vector-Rev           | ATCCGAGCTCGGTACCTACTGCTGAGAGTCGGTC               |
| BirA*-Sec61 $\beta$ -Rev    | CCACTGCCCTTCTCTGCGCTTCTCAG                       |
| BirA*-Sec61 $\beta$ -Fwd    | CAGAGAAGGGCAGTGGCAGTCCCTGGTCCGACCCCACT           |
| Sec61 $\beta$ -Vector-Rev   | GGGTTTTAAACGGGCCCTACGAACGAGTGTACTTGCCC           |
| Vector-Sec62-Fwd            | GCGTTTTAACTTAAGCTTATGGCGGAACGCAGGAGA             |
| Sec62-BirA*-Rev             | CTTACTGCCACTGCCTGATTTTTTCATGTGAAGATTTAGGTGTTTCTC |
| Vector-C terminal-BirA*-Rev | AAGCTTAAGTTTAAACGCTAGAGTC                        |
| Vector-C terminal-BirA*-Fwd | GGCAGTGGCAGTAAGGA                                |

701



702 Sequences were confirmed using a CMV-Forward and BGH-Reverse sequencing primers  
703 supplied by Eton Biosciences (Research Triangle Park, NC).

704

#### 705 **Generation of HEK293 Flp-In T-Rex cell lines.**

706 HEK293 Flp-In T-REx cell lines were generated according to the manufacturer's  
707 instructions (Thermo Fisher Scientific). Cells were transfected in 6-well culture dishes at  
708 80% confluence using 7.5  $\mu$ L of Lipofectamine 3000 (Thermo Fisher, L3000001) with 0.4  
709  $\mu$ g of plasmid containing the desired fusion protein and 4  $\mu$ g of pOGG4 plasmid. Selection  
710 with 100  $\mu$ g/mL hygromycin (MediaTech, 30-240-CR, Manassas, VA) and 15  $\mu$ g/mL  
711 blasticidin (Thermo Fisher, R21001) was started 48 hours after transfection and continued  
712 for 2 weeks at which point colonies were identified. A control cell line was generated by  
713 recombination of an empty vector pcDNA5-FRT/TO and antibiotic selection for an empty  
714 vector matched control.

715

#### 716 **Expression of BirA fusion proteins**

717 Expression levels were examined by doxycycline (Sigma Aldrich, D9891, St. Louis, MO)  
718 titration and the following doxycycline concentrations were used for each construct:  
719 10ng/mL LRRC59-BioID, 5 ng/mL Sec61 $\beta$ -BioID, 50 ng/mL Ribophorin I-BioID, 100  
720 ng/mL Sec62-BioID. Expression of BioID constructs was performed for at least 16 hr  
721 before addition of biotin unless otherwise noted.

722

#### 723 **Immunofluorescence Analyses**

724 Cells were plated on poly-lysine coated 22 mm #1.5 coverslips (Globe Scientific, 1404-  
725 15, Paramus, NJ). Reporter expression was induced by doxycycline addition and 50  $\mu$ M

726 biotin added for an overnight labeling. After 16 hours, cells are washed twice with PBS,  
727 fixed in 4% paraformaldehyde for 10 min on ice and 10 min at room temperature then  
728 washed 3 times with PBS for 5 min each. Cells were permeabilized with a blocking  
729 solution of 3% BSA and 0.1% saponin (Sigma Aldrich, S-2149) in PBS for 1 hr at room  
730 temperature. Primary staining was performed in the identical solution supplemented with  
731 1:200 BirA antibody (Sino Biological Inc., rabbit IgG, Wayne, PA) or 1:50 TRAP $\alpha$  antibody  
732 (Migliaccio, Nicchitta, & Blobel, 1992) (polyclonal, rabbit IgG) at 4°C overnight. Following  
733 5 x 3min washes of 0.1% saponin in PBS, coverslips were incubated with 1:200 goat anti-  
734 rabbit IgG AlexaFluor488 (Thermo Fisher, A-11034), 1:1000 streptavidin-Alexafluor647  
735 (Thermo Fisher, S21374) and 1:10000 DAPI (0.5mg/mL stock solution) mixed in blocking  
736 solution at room temperature for 45 min in the dark. Coverslips were washed 5X as  
737 above, rinsed and mounted in FluorSave hard mount (CalBioChem, 345789, Burlington,  
738 MA) and cured at 4°C overnight prior to imaging.

739

## 740 **Fluorescence Imaging**

741 All imaging was performed on a DeltaVision deconvolution microscope (Applied  
742 Precision, Issaquah, WA) equipped with 100x NA 1.4 oil immersion objective (UPlanSApo  
743 100XO; Olympus, Tokyo, Japan) and a high-resolution CCD camera (CoolSNAP HQ2;  
744 Photometrics, Tucson, AZ). Images were acquired as Z-stacks (at 0.2 $\mu$ m intervals) at  
745 identical exposure conditions across the samples for a given protein. The data were  
746 deconvolved using the c program (Applied Precision, Mississauga, ON) and processed  
747 further on ImageJ-FIJI software to render maximum intensity projections (as required),  
748 merge channels and pseudo color the images. Only linear changes were done to the

749 brightness/contrast values of the images, as required and such changes were applied  
750 uniformly across all images in a given experiment.

751

## 752 **Sequential Detergent Fractionation and General Cell Lysis**

753 Cells were washed twice with ice-cold PBS containing 50 µg/mL of cycloheximide (CHX)  
754 (VWR, 94271, Radnor, PA) for 3 min each wash. Permeabilization buffer (110 mM KOAc,  
755 25 mM HEPES pH 7.2, 2.5 mM Mg(OAc)<sub>2</sub>, 0.03% digitonin (Calbiochem, 3004010), 1 mM  
756 DTT, 50 µg/mL CHX, 40U/mL RNaseOUT (Invitrogen, 10777-019, Carlsbad, CA),  
757 Protease Inhibitor Complex (PIC) (Sigma Aldrich, P8340)) was added to cells and  
758 incubations performed for 5 min at 4°C. The supernatant fraction (cytosol) was collected  
759 and cells rinsed with wash buffer (110 mM KOAc, 25 mM HEPES pH 7.2, 2.5 mM  
760 Mg(OAc)<sub>2</sub>, 0.004% digitonin, 1 mM DTT, 50 µg/mL CHX, 40U/mL RNaseOUT, Protease  
761 Inhibitor Complex (PIC)). Cells were then lysed in NP-40 lysis buffer (400 mM KOAc, 25  
762 mM HEPES pH 7.2, 15 mM Mg(OAc)<sub>2</sub>, 1% NP-40, 0.5% DOC, 1 mM DTT, 50 µg/mL  
763 CHX, 40U/mL RNaseOUT, Protease Inhibitor Complex (PIC)) for 5 min at 4°C. Both  
764 cytosolic and membrane fractions were cleared by centrifugation (15,300 x g for 10 min).  
765 Total cell lysis was performed in the ER lysis buffer by incubating cells at 4°C for 10 min.  
766 Lysates were cleared by centrifugation as above.

767

## 768 ***In Vitro* BirA\* Labeling of Microsomes**

769 Canine pancreas rough microsomes (RM) (Walter & Blobel, 1980) were adjusted to a  
770 concentration of 4 mg/mL protein in 500 µL of BirA reaction buffer (20 mM Tris pH 8, 5  
771 mM CaCl<sub>2</sub>, 100 mM KCl<sub>2</sub>, 10 mM MgCl<sub>2</sub>, 3 mM ATP, 1.5 mM biotin, 5 mM

772 phosphocreatine (Sigma-Aldrich, P7936-1G) and 5 µg/mL of creatine kinase (Sigma-  
773 Aldrich, C3755-3.5KU)). Purified recombinant BirA\*-GST fusion protein was added to a  
774 concentration of 10 µg/mL. At 0, 1, 3, 6, and 18 hrs, 100 µL of reaction was removed,  
775 flash frozen in an ethanol bath and stored at –80°C prior to Western blot analysis.

776

## 777 **Western blotting**

778 Lysate protein concentrations were determined using a Pierce BCA Protein Assay Kit  
779 (ThermoFisher, 23225). SDS-PAGE was performed in 12% acrylamide gels containing  
780 0.5% of trichloroethanol. Gels were UV irradiated for 5 min and imaged using an  
781 Amersham Imager 600 (GE Life Sciences, Pittsburgh, PA) to verify protein loading. Gels  
782 were then equilibrated in Tris-glycine transfer buffer for 5 min and transferred using a  
783 Trans Blot SD Semi-Dry Transfer apparatus (Biorad, Hercules, CA). Blots were blocked  
784 in PBS, 3% BSA for 1 hr before primary antibody was added at the indicated dilution and  
785 incubated for 2 hr at RT or overnight at 4°C. Goat secondary antibodies (Li-Cor, Lincoln,  
786 NE) were matched to the species of the primaries used and diluted 1:10,000. Streptavidin  
787 was used at a dilution of 1:20,000. Secondary reagents were incubated for 45 min,  
788 washed 5x with TBST and imaged on the Odyssey Clx (Li-Cor). Primaries used: BirA  
789 (Abcam #14002, polyclonal, chicken IgG), TRAPα (Migliaccio et al., 1992)(polyclonal,  
790 rabbit IgG), tubulin (Iowa Hybridoma Bank, E7, monoclonal, mouse IgG, Iowa City, IA),  
791 Sec61β (Gift of Ramanujan Hegde, University of Cambridge, polyclonal, rabbit IgG),  
792 LRRC59 (Bethyl Labs A305-076A, polyclonal, rabbit IgG, Montgomery, TX), Sec62 (gift  
793 from Richard Zimmerman, polyclonal, rabbit IgG), Ribophorin I (Migliaccio et al.,  
794 1992)(polyclonal, rabbit IgG), streptavidin-RD680 (Li-Cor, P/N 925-68079).

795

## 796 **RNA Extraction**

797 As adapted from (Chomczynski & Sacchi, 2006), RNA was extracted from 1 volume of  
798 lysate using 2 volume of GT buffer to 0.5 volumes of water-saturated phenol, pH 4.5 and  
799 incubated for 5 min at RT before adding 0.8 volume of chloroform. Following  
800 centrifugation for 15 min at 10,000xg, 4°C for 15 min, the aqueous phase was recovered,  
801 and RNA precipitated by addition of 1.2 volumes of isopropanol and 0.15 volume of 3M  
802 sodium citrate pH 5.2. Following incubation at -20°C for 1 hr, RNA was recovered by  
803 centrifugation at 10,000xg, 4°C for 20 min. RNA pellets were washed in 70% ethanol,  
804 dried, and resuspended in TE buffer (10 mM Tris pH 8.0, 1 mM EDTA). RNA  
805 concentrations were determined using a NanoDrop ND-1000 Spectrophotometer  
806 (Thermo Fisher Scientific). RNA quality was examined by denaturing formaldehyde gel  
807 electrophoresis.

808

## 809 **Glycerol Gradients**

810 As adapted from (Nikonov et al., 2002), reporter construct expressing BiID lines were  
811 lysed in 1 ml/10cm dish of homogenization buffer (20 mM Tris pH 7.4, 500 mM NaCl,  
812 1.5% digitonin, 1mM MnCl<sub>2</sub>, 1 mM MgCl<sub>2</sub>, 1mM DTT, PIC) for 30 min at 4°C. Lysates  
813 were cleared by centrifugation in a TLA 100.2 rotor at 40,000 rpm for 10 min, 4°C (TL-  
814 100 Ultracentrifuge, Beckman Coulter, Brea, CA). 850 µL of the supernatant was then  
815 loaded onto a 8-30% glycerol gradient and centrifuged in an SW-41 rotor at 35,000 rpm  
816 for 15.5 hr, 4°C (L5-50B Ultracentrifuge, Beckman). Gradients were fractionated into 12

817 fractions using a Teledyne Isco gradient fractionation system and analyzed by  
818 immunoblot.

819

## 820 **Polysome Gradients**

821 Cells expressing BioID constructs were lysed in 50 mM HEPES, pH 7.2, 200 mM KOAc,  
822 1 mM DTT, 2% dodecylmaltoside (ChemImpex Intl Inc, 21950, Wood Dale, IL), 5 mM  
823 EGTA, PIC, 1mM DTT, 50 µg/mL CHX for 10 min at 4°C. Cell lysates were cleared at  
824 15,300xg for 10 min, 4°C. 0.8 mL of lysate was loaded onto 15-50% sucrose gradients  
825 and centrifuged for 3 hours at 35,000 rpm, 4°C (L5-50B Ultracentrifuge, Beckman).  
826 Gradients were fractionated into 12 fractions using a Teledyne Isco (Lincoln, NE) gradient  
827 fractionation system and analyzed by immunoblot and denaturing RNA gel  
828 electrophoresis.

829

## 830 **Biotin Pulldowns**

831 Adapted from (Firat-Karalar & Stearnsx, 2015): Constructs were expressed as above,  
832 with biotinylation reactions performed for 3 hours prior to sequential detergent  
833 fractionation. The membrane fraction was obtained and volume adjusted to a protein  
834 concentration of ca. 1.3 mg/ml and diluted 1:1 with 100 mM NaCl, 50 mM HEPES pH 7.4  
835 to reduce detergent concentrations. Pierce NeutrAvidin Agarose (Thermo Fisher, 29200)  
836 resin was blocked for 1 hr with 1% BSA and washed three times in HEPES buffer.  
837 Pulldown reactions were performed overnight at 4°C. Beads were washed with the  
838 following buffers twice each for 10 min at RT. Buffer 1: 2% SDS in 50 mM HEPES pH  
839 7.2 Buffer 2: 0.1% DOC, 1% Triton X-100, 1mM EDTA, 500 mM NaCl, 50 mM HEPES pH

840 7.5 Buffer 3: 0.5% DOC, 0.5% NP-40, 1mM EDTA, 250 mM LiCl, 10 mM Tris pH 7.4.  
841 Beads were then suspended in 50  $\mu$ L of biotin elution buffer, vortexed, and heated for 15  
842 min at 70°C. Supernatant fractions were combined and concentrated to 50  $\mu$ L in a Savant  
843 SpeedVac Concentrator (Thermo Fisher Scientific).

844

### 845 **Ribosome Pulldowns**

846 Cells were washed with PBS and lysed in NP-40 lysis buffer (as above). Lysates were  
847 cleared at 15,300 x g for 10 min and the supernatant fraction overlaid onto a 1M sucrose  
848 cushion (2:1, load:cushion). Samples were centrifuged at 80,000 rpm for 25 min (TLA  
849 100 rotor in TL-100 ultracentrifuge, Beckman). Ribosome pellets were washed with PBS  
850 before being suspended in 50 mM HEPES, pH 7.4, 100 mM NaCl, 1% SDS, 10 mM  
851 EDTA, 1 mM DTT, by Dounce homogenization. Ribosome concentration was determined  
852 by the  $A_{260}$  absorbance and calculated using the extinction coefficient:  $5 \times 10^7 / \text{cm} \cdot \text{M}$   
853 (Matasova et al., 1991). Equal amounts of ribosomes were used for pulldowns, as above.  
854 Binding reactions were performed by end-over-end mixing for 90 minutes at room  
855 temperature. Beads were washed as above and suspended in 20  $\mu$ L of HEPES buffer  
856 and submitted to the Duke Proteomics Core (DPMSR) for on-bead digestion.

857

### 858 **Mass Spectrometry**

859 **On-Resin Trypsin Digestion.** The Dynabead complexes in solution were washed three  
860 times with 500  $\mu$ L of 50 mM ammonium bicarbonate (AmBic) (Millipore Sigma, Burlington,  
861 MA). Twenty microliters of 1.0% acid labile surfactant (RapiGest, Waters, Milford, MA) in  
862 AmBic was added to each sample followed by an additional twenty microliters of AmBic.

863 Samples were subsequently reduced with 10 mM dithiothreitol (DTT, Millipore Sigma) for  
864 30 minutes at 40°C with shaking, and alkylated using 20 mM iodoacetamide (IAM, VWR  
865 Scientific) for 30 minutes at room temperature. Digestion was performed using 500 ng  
866 sequencing grade trypsin in AmBic (5  $\mu$ L at 0.1  $\mu$ g/ $\mu$ L, Promega, Madison, WI), at 37°C  
867 overnight with shaking. Peptides were extracted by decanting supernatant into a  
868 separate 1.5 mL Eppendorf (Hamburg, Germany) LoBind tube, and washing the resin  
869 with 50  $\mu$ L additional AmBic, which was also combined with digested peptides. The  
870 combined extract was acidified to 1% v/v trifluoroacetic acid (Thermo Fisher Scientific),  
871 heated to 60°C for 2 hours to cleave the RapiGest surfactant, and lyophilized to dryness.  
872

873 **Gel Electrophoresis.** Samples were transferred to the DPMSR for one dimensional  
874 sodium dodecyl sulfate polyacrylamide gel electrophoresis (SDS-PAGE). 25  $\mu$ L of sample  
875 was combined with 5  $\mu$ L of 100 mM DTT and 10  $\mu$ L of NuPAGE™ (Thermo Fisher  
876 Scientific) 4X loading buffer and samples were then heated to 70°C for ten minutes with  
877 shaking. SDS-PAGE separation was performed using 1.5 mm 4-12% Bis-Tris pre-cast  
878 polyacrylamide gels (Novex, Thermo Fisher Scientific), 1X MES SDS NuPAGE™  
879 Running Buffer (Thermo Fisher Scientific) including NuPAGE™ antioxidant. SDS-PAGE  
880 separation was performed at a constant 200V for five minutes, gels fixed for 10 minutes,  
881 stained for 3 hours, and destained overnight following manufacturer instructions.

882

883 **Gel Band Isolation and Trypsin Digestion.** Gel bands of interest were isolated using a  
884 sterile scalpel transferred to protein LoBind tubes (Eppendorf) and minced. Gel pieces  
885 were washed with 500  $\mu$ L of 40% LCMS grade acetonitrile (MeCN, Thermo Fisher



886 Scientific) in AmBic, with shaking at 30°C. Gel pieces were shrunk with LCMS grade  
887 MeCN, the solution discarded, and the gel pieces dried at 50°C for 3 min. Reduction of  
888 disulfides was performed using 100 µL of 10 mM DTT at 80°C for 30 min with shaking,  
889 followed by alkylation with 100 µL of 55 mM IAM at RT for 20 min. This liquid was  
890 aspirated from the samples and discarded, and gel pieces were washed twice with 500  
891 µL AmBic, and these washes were also discarded. LCMS grade MeCN was added to  
892 shrink the gel pieces in each sample, then samples were swelled in AmBic and this  
893 process was repeated a second time, finally the gel pieces were shrunk a final time by  
894 adding 200 µL of LCMS grade MeCN, and heating for 3 min at 50°C to promote  
895 evaporation. Trypsin digestion was performed with addition of 30 µL of 10 ng/µL  
896 sequencing grade trypsin (Promega, Madison, WI) in AmBic followed by 30 µL of  
897 additional AmBic. The samples were incubated overnight at 37°C with shaking at 750  
898 rpm. Finally after overnight digestion 60 µL of 1/2/97 v/v/v TFA/MeCN/water was added  
899 to each sample and incubated for 30 min at RT and 750 rpm to extract peptides, and the  
900 combined supernatant was transferred to an autosampler vial (Waters). Gel pieces were  
901 shrunk in 50 µL additional MeCN for 10 min to extract the maximum amount of peptides,  
902 which was combined with the previous supernatant. The samples were dried in the  
903 Vacufuge (Eppendorf) and stored at -80°C until ready for LC-MS/MS analysis.

904

905 **Qualitative Analysis of On-Resin and Gel Electrophoresis Samples.** All on-resin and  
906 gel band samples were resuspended in 20 µL of 1/2/97 v/v/v TFA/MeCN/water. The  
907 samples were analyzed by nanoLC-MS/MS using a Waters nanoAcquity LC interfaced to  
908 a Thermo Q-Exactive Plus via a nanoelectrospray ionization source. 2 µL of each on-

909 resin sample, and 1  $\mu$ L of each gel band sample was injected for analysis. Each sample  
910 was first trapped on a Symmetry C18, 300  $\mu$ m x 180 mm trapping column (5  $\mu$ l/min at  
911 99.9/0.1 v/v H<sub>2</sub>O/MeCN for 5 min), after which the analytical separation was performed  
912 using a 1.7  $\mu$ m ACQUITY HSS T3 C18 75  $\mu$ m x 250 mm column (Waters). The peptides  
913 were eluted using a 90 min gradient of 5-40% MeCN with 0.1% formic acid at a flow rate  
914 of 400 nl/min with a column temperature of 55 °C.

915

916 Data collection on the Q Exactive Plus mass spectrometer was performed with data  
917 dependent acquisition (DDA) MS/MS, using a 70,000 resolution precursor ion (MS1) scan  
918 followed by MS/MS (MS2) of the top 10 most abundant ions at 17,500 resolution. MS1  
919 was performed using an automatic gain control (AGC) target of 1e6 ions and maximum  
920 ion injection (max IT) time of 60 msec. MS2 used AGC target of 5e4 ions, 60 ms max IT  
921 time, 2.0 m/z isolation window, 27 V normalized collision energy, and 20 s dynamic  
922 exclusion. The total analysis cycle time for each sample injection was approximately 2 h.  
923 The sample run order was chosen to minimize potential carryover and is detailed as  
924 follows for the on-resin and gel band samples, respectively: 125-EV, 125-LR59, 125-S61,  
925 1210-EV, 1210-LR59, 1210-S61, EV, LRRC59, SEC62, SEC61B, and RPN1.

926

927 **Database searching.** Proteome Discoverer (Thermo Fisher Scientific) was used to  
928 generate mgf files from the DDA analyses and the data was searched using Mascot v 2.5  
929 (Matrix Science) with a custom database containing the human proteome downloaded  
930 from UniProt combined with common proteins found in BirA experiments and common  
931 contaminants. The data was searched using trypsin enzyme cleavage rules and a

932 maximum of 4 missed cleavages, fixed modification carbamidomethylated cysteine,  
933 variable modifications biotinylated lysine, deamidated asparagine and glutamic acid and  
934 oxidated methionine. The peptide mass tolerance was set to +/- 5 ppm and the fragment  
935 mass tolerance was set to +/- 0.02 Da. False discovery rate control for peptide and  
936 protein identifications was performed using Scaffold v4 (Proteome Software, Inc).

937

### 938 **Analysis of Scaffold data**

939 Method adapted from Ritchie, Cylinder, Platt, & Barklis, 2015. For the membrane protein  
940 data sets of each biological replicate, hits with 1% FDR at the protein level, 50% peptide  
941 match with a minimum of 2 peptides and 2 spectral counts were used for subsequent  
942 analysis. Each dataset is first normalized by summing spectral counts for the natively  
943 biotinylated proteins-acetyl-CoA carboxylase, propionyl CoA carboxylase, pyruvate  
944 carboxylase, and methyl crotonyl-CoA carboxylase subunits – and dividing all spectral  
945 counts by this number. Proteins less than 2.5-fold above the same proteins in the  
946 respective control dataset were removed. The remaining protein spectral counts for each  
947 dataset were averaged and normalized by dividing by the BirA protein spectral counts to  
948 account for any differences in reporter expression. Analyses were performed so that any  
949 proteins with average normalized counts higher than 2-fold above the same protein in the  
950 three other datasets was assigned to the specific cell line as “enriched.” Remaining  
951 proteins were analyzed by covariance of normalized counts with a cut-off of 40.0. These  
952 proteins were shared between at least two of the cell lines with higher than 2-fold  
953 normalized counts of the lowest count. For figure clarity, the Cytoscape plot in **Figure 8B**  
954 displays those shared proteins with a covariance of 50.0 or above.

955 For localization prediction, a FASTA file containing the protein sequences was generated  
956 and processed on the TMHMM Server v2.0 (DTU Bioinformatics) to identify membrane  
957 vs soluble proteins. Localization by organelle (**Fig 6B**) was determined by running the  
958 datasets through DeepLoc v1.0 (DTU Bioinformatics) using the Profiles algorithm.

959

960 For ribosomal protein data sets, spectral counts were retrieved for only ribosomal protein  
961 hits with 90% protein identity, 50% peptide identity with at least 2 peptides. Each  
962 experiment dataset was divided by the control, and those exceeding a 2-fold difference  
963 were further analyzed. For each candidate, sample spectral counts were divided by the  
964 control and proteins with greater than 2-fold difference are termed “enriched” and those  
965 below the cutoff are termed “shared”. Those proteins with the same term between the  
966 two datasets are kept and mapped onto PDB file 37JR, of the translating ribosome on the  
967 translocon.

968

### 969 **Biotinylated Polysome Isolation and Sequencing**

970 Ribosomes were purified from the membrane fractions of sequential detergent  
971 fractionation of the indicated BioID cell lines by gel filtration chromatography, collecting  
972 the fraction of a Sephacryl S400 column operating at a flow rate of 0.7 mL/min.  
973 Dynabeads M-270 Streptavidin beads (ThermoFisher, 65305) and 0.05% Triton X-100  
974 are added to each sample and incubated overnight at 4°C. Beads were washed three  
975 times for 10 min at 4°C in high-salt wash buffer followed by suspension in low-salt buffer  
976 and extraction of bound RNA using an RNeasy Kit (Qiagen, 74104, Hilden, Germany).  
977 RNA was quantified by Bioanalyzer 2100 analysis (Agilent, Santa Clara, CA) and like

978 samples combined to provide 10 ng of total RNA total. RNA samples were concentrated  
979 to 12  $\mu$ L using E.Z.N.A. MicroElute RNA Cleanup Kit (Omega Bio-Tek, R6247, Norcross,  
980 GA) and libraries constructed using Ultra II RNA Library Kit (NEB, E7645S) for biological  
981 duplicates.

982

### 983 **Illumina Hi-Seq**

984 Libraries were submitted to the Duke Sequencing and Genomic Technologies for  
985 sequencing. Concentration of each library was estimated using Qubit assay and run on  
986 an Agilent Bioanalyzer for library size estimation. Libraries were then pooled into  
987 equimolar concentration. Final pool was clustered on a HiSeq 4000 Single-Read flow  
988 cell. Sequencing was done at 50bp Single-Read. Bcls files generated by the sequencer  
989 were then converted into fastq files using Illumina bcl2fastq v2.20.0.422 and reads  
990 demultiplexed using the molecular indexes incorporated during library preparation.

991

### 992 **Sequencing Analysis**

993 FASTA files were adapter trimmed using Trimmomatic v0.32 (Bolger, Lohse, & Usadel,  
994 2014), aligned to the human genome, build GRCh38/h38, using HISAT2.0.5 default  
995 options for unpaired reads (D. Kim, Langmead, & Salzberg, 2015). Aligned read files  
996 were then counted using htseq-count v0.5.4p3 (Anders, Pyl, & Huber, 2015) using options  
997 for non-stranded reads, intersection-strict mode, and 'exon' as the feature to be counted  
998 using a UCSC hg38 GTF annotation file. This GTF file with unique gene IDs and  
999 transcript IDs was generated to a genePred file for hg38 using the genePredtoGTF script  
1000 from kentUtils. Data sets from the two cell lines were analyzed for differential expression

1001 versus the control experiments using DESeq2v1.18.1 (Love, Huber, & Anders, 2014).  
1002 Gene lists were generated by taking the subset with greater than or equal to 2-fold change  
1003 over the control data set with an adjusted p-value of 0.05 (Benjamini & Hochberg, 1995).  
1004 Genes coding for protein products were selected for interaction and GO analysis using  
1005 the STRING database. Localization predication analysis was performed using the  
1006 DeepLoc1.0 Profiles algorithm (Almagro Armenteros et al., 2017). Transcript per million  
1007 (TPM) analysis was performed by first calculating reads per kilobase (RPK), summing the  
1008 RPK values and dividing by 1 million to use as the scaling factor (SF). Individual RPK  
1009 values were divided by the SF to obtain a gene specific TPM value for the given subset  
1010 of data for better comparison of the datasets.

1011

1012

1013

1014

1015

1016

1017

1018

1019

1020

1021

1022

1023

1024 **Acknowledgements:**

1025 We thank the Duke University School of Medicine for the use of the Proteomics and  
1026 Metabolomics Shared Resource which provided the proteomics service for this study. In  
1027 particular, we would like to acknowledge Will Thompson, PhD and Sarah Raines of the  
1028 Duke Proteomics Core facility for very helpful guidance and advice on experimental  
1029 design and data analysis. We acknowledge key instrumental resources (QE Plus)  
1030 supported by NIH S10OD012266-01A1. We also thank the Duke Sequencing and  
1031 Genomic Technologies Shared Resource, in particular Nicolas Devos, PhD, for advice,  
1032 guidance, and generous support of the deep sequencing studies. We especially thank  
1033 members of the Nicchitta lab, in particular Jessica Childs, Heather Vincent, and Jason  
1034 Arne for insightful discussions throughout this project. The E7 monoclonal antibody was  
1035 obtained from the Developmental Studies Hybridoma Bank, created by the NICHD of the  
1036 NIH and maintained at The University of Iowa, Department of Biology, Iowa City, IA  
1037 52242. This research was supported by funding from the NIH (GM101533-A1,  
1038 GM118630-A1, CVN).

## 1039 References

- 1040 Almagro Armenteros, J. J., Sønderby, C. K., Sønderby, S. K., Nielsen, H., Winther, O.,  
1041 & Hancock, J. (2017). DeepLoc: prediction of protein subcellular localization using  
1042 deep learning. *Bioinformatics*, 33(21), 3387–3395.  
1043 <http://doi.org/10.1093/bioinformatics/btx431>
- 1044 Anders, S., Pyl, P. T., & Huber, W. (2015). HTSeq-A Python framework to work with  
1045 high-throughput sequencing data. *Bioinformatics*, 31(2), 166–169.  
1046 <http://doi.org/10.1093/bioinformatics/btu638>
- 1047 Baltz, A. G., Munschauer, M., Schwanhäusser, B., Vasile, A., Murakawa, Y., Schueler,  
1048 M., ... Landthaler, M. (2012). The mRNA-Bound Proteome and Its Global  
1049 Occupancy Profile on Protein-Coding Transcripts. *Molecular Cell*, 46(5), 674–690.  
1050 <http://doi.org/10.1016/j.molcel.2012.05.021>
- 1051 Banani, S. F., Lee, H. O., Hyman, A. A., & Rosen, M. K. (2017). Biomolecular  
1052 condensates: Organizers of cellular biochemistry. *Nature Reviews Molecular Cell  
1053 Biology*, 18(5), 285–298. <http://doi.org/10.1038/nrm.2017.7>
- 1054 Becker, T., Bhushan, S., Jarasch, A., Armache, J.-P., Funes, S., Jossinet, F., ...  
1055 Beckmann, R. (2009). Structure of monomeric yeast and mammalian Sec61  
1056 complexes interacting with the translating ribosome. *Science*, 326(5958), 1369–  
1057 1373. <http://doi.org/10.1126/science.1178535>
- 1058 Benedix, J., Lajoie, P., Jaiswal, H., Burgard, C., Greiner, M., Zimmermann, R., ...  
1059 Dudek, J. (2010). BiP Modulates the Affinity of Its Co-chaperone ERj1 for  
1060 Ribosomes. *Journal of Biological Chemistry*, 285(47), 36427–36433.  
1061 <http://doi.org/10.1074/jbc.M110.143263>
- 1062 Benjamini, Y., & Hochberg, Y. (1995). Controlling the False Discovery Rate: A Practical  
1063 and Powerful Approach to Multiple Controlling the False Discovery Rate: a Practical  
1064 and Powerful Approach to Multiple Testing. *Source Journal of the Royal Statistical  
1065 Society. Series B (Methodological)*, 57(1), 289–300. <http://doi.org/10.2307/2346101>
- 1066 Blau, M., Mullapudi, S., Becker, T., Dudek, J., Zimmermann, R., Penczek, P. A., &  
1067 Beckmann, R. (2005). ERj1p uses a universal ribosomal adaptor site to coordinate  
1068 the 80S ribosome at the membrane. *Nature Structural and Molecular Biology*,  
1069 12(11), 1015–1016. <http://doi.org/10.1038/nsmb998>
- 1070 Bolger, A. M., Lohse, M., & Usadel, B. (2014). Trimmomatic: a flexible trimmer for  
1071 Illumina sequence data. *Bioinformatics*, 30(15), 2114–20.  
1072 <http://doi.org/10.1093/bioinformatics/btu170>
- 1073 Braunger, K., Pfeffer, S., Shrimal, S., Gilmore, R., Berninghausen, O., Mandon, E. C.,  
1074 Becker, T., Förster, F., Beckmann, R. (2018). Structural basis for coupling protein  
1075 transport and N-glycosylation at the mammalian endoplasmic reticulum, *Science*  
1076 360(6385), 215-219.  
1077 doi: 10.1126/science.aar7789
- 1078 Castello, A., Fischer, B., Eichelbaum, K., Horos, R., Beckmann, B. M., Strein, C., ...  
1079 Hentze, M. W. (2012). Insights into RNA biology from an atlas of mammalian  
1080 mRNA-binding proteins. *Cell*, 149(6), 1393–406.  
1081 <http://doi.org/10.1016/j.cell.2012.04.031>
- 1082 Castello, A., Fischer, B., Frese, C. K., Horos, R., Alleaume, A.-M., Foehr, S., ... Hentze,  
1083 M. W. (2016). Comprehensive Identification of RNA-Binding Domains in Human



- 1084 Cells. *Molecular Cell*, 63(4), 696–710. <http://doi.org/10.1016/j.molcel.2016.06.029>
- 1085 Chartron, J. W., Hunt, K. C. L., & Frydman, J. (2016). Cotranslational signal-  
1086 independent SRP preloading during membrane targeting. *Nature*, 536(7615), 224–  
1087 8. <http://doi.org/10.1038/nature19309>
- 1088 Chiantia, S., Ries, J., Chwastek, G., Carrer, D., Li, Z., Bittman, R., & Schwille, P. (2008).  
1089 Role of ceramide in membrane protein organization investigated by combined AFM  
1090 and FCS. *Biochimica et Biophysica Acta (BBA) - Biomembranes*, 1778(5), 1356–  
1091 1364. <http://doi.org/10.1016/J.BBAMEM.2008.02.008>
- 1092 Choi-Rhee, E., Schulman, H., & Cronan, J. E. (2004). Promiscuous protein biotinylation  
1093 by *Escherichia coli* biotin protein ligase. *Protein Science*, 13(11), 3043–3050.  
1094 <http://doi.org/10.1110/ps.04911804>
- 1095 Chomczynski, P., & Sacchi, N. (2006). The single-step method of RNA isolation by acid  
1096 guanidinium thiocyanate–phenol–chloroform extraction: twenty-something years  
1097 on. *Nature Protocols*, 1(2), 581–585. <http://doi.org/10.1038/nprot.2006.83>
- 1098 Cross, B. C. S., Sinning, I., Luirink, J., & High, S. (2009). Delivering proteins for export  
1099 from the cytosol. *Nature Reviews Molecular Cell Biology*, 10(4), 255–264.  
1100 <http://doi.org/10.1038/nrm2657>
- 1101 Cui, K., Coutts, M., Stahl, J., & Sytkowski, A. J. (2000). Novel interaction between the  
1102 transcription factor CHOP (GADD153) and the ribosomal protein FTE/S3a  
1103 modulates erythropoiesis. *Journal of Biological Chemistry*, 275(11), 7591–6.  
1104 <http://doi.org/10.1074/JBC.275.11.7591>
- 1105 Cui, X. A., Zhang, H., & Palazzo, A. F. (2012). p180 Promotes the Ribosome-  
1106 Independent Localization of a Subset of mRNA to the Endoplasmic Reticulum.  
1107 *PLoS Biology*, 10(5). <http://doi.org/10.1371/journal.pbio.1001336>
- 1108 de Brito, O. M., & Scorrano, L. (2010). An intimate liaison: spatial organization of the  
1109 endoplasmic reticulum-mitochondria relationship. *The EMBO Journal*, 29(16),  
1110 2715–23. <http://doi.org/10.1038/emboj.2010.177>
- 1111 Deshaies, R. J., Sanders, S. L., Feldheim, D. A., & Schekman, R. (1991). Assembly of  
1112 yeast Sec proteins involved in translocation into the endoplasmic reticulum into a  
1113 membrane-bound multisubunit complex. *Nature*, 349(6312), 806–808.  
1114 <http://doi.org/10.1038/349806a0>
- 1115 Diehn, M., Bhattacharya, R., Botstein, D., & Brown, P. O. (2006). Genome-Scale  
1116 Identification of Membrane-Associated Human mRNAs. *PLoS Genetics*, 2(1), e11.  
1117 <http://doi.org/10.1371/journal.pgen.0020011>
- 1118 Diehn, M., Eisen, M. B., Botstein, D., & Brown, P. O. (2000). Large-scale identification  
1119 of secreted and membrane-associated gene products using DNA microarrays.  
1120 *Nature Genetics*, 25(1), 58–62. <http://doi.org/10.1038/75603>
- 1121 English, A. R., & Voeltz, G. K. (2013). Endoplasmic reticulum structure and  
1122 interconnections with other organelles. *Cold Spring Harbor Perspectives in Biology*,  
1123 5(4), 1–16. <http://doi.org/10.1101/cshperspect.a013227>
- 1124 Fawcett, D. W. (1966). *An Atlas of Fine Structure: the cell, its organelles, and inclusions*  
1125 (Reprint Edition). Philadelphia: WB Saunders Co.
- 1126 Firat-Karalar, E. N., & Stearns, T. (2015). Probing mammalian centrosome structure  
1127 using BiLD proximity dependent biotinylation. In *Methods in Cell Biology* (Vol. 129,  
1128 pp. 153–170). <http://doi.org/10.1016/bs.mcb.2015.03.016>
- 1129 Gardner, B. M., Pincus, D., Gotthardt, K., Gallagher, C. M., & Walter, P. (2013).

- 1130 Endoplasmic reticulum stress sensing in the unfolded protein response. *Cold*  
1131 *Spring Harbor Perspectives in Biology*, 5(3), a013169.  
1132 <http://doi.org/10.1101/cshperspect.a013169>
- 1133 Gilbert, W. V. (2011). Functional specialization of ribosomes? *Trends in Biochemical*  
1134 *Sciences*, 36(3), 127–32. <http://doi.org/10.1016/j.tibs.2010.12.002>
- 1135 Gorlich, D., Prehn, S., Hartmann, E., Kalies, K. U., & Rapoport, T. A. (1992). A  
1136 mammalian homolog of SEC61p and SECYp is associated with ribosomes and  
1137 nascent polypeptides during translocation. *Cell*, 71, 489–503. Retrieved from  
1138 [http://dx.doi.org/10.1016/0092-8674\(92\)90517-G](http://dx.doi.org/10.1016/0092-8674(92)90517-G)
- 1139 Goyette, J., & Gaus, K. (2017). Mechanisms of protein nanoscale clustering. *Current*  
1140 *Opinion in Cell Biology*, 44, 86–92. <http://doi.org/10.1016/J.CEB.2016.09.004>
- 1141 Gupta, G. D., Coyaud, É., Gonçalves, J., Mojarad, B. A., Liu, Y., Wu, Q., ... Pelletier, L.  
1142 (2015). A Dynamic Protein Interaction Landscape of the Human Centrosome-Cilium  
1143 Interface. *Cell*, 163(6), 1484–99. <http://doi.org/10.1016/j.cell.2015.10.065>
- 1144 Harada, Y., Li, H., Li, H., & Lennarz, W. J. (2009). Oligosaccharyltransferase directly  
1145 binds to ribosome at a location near the translocon-binding site. *Proceedings of the*  
1146 *National Academy of Sciences*, 106(17), 6945–6949.  
1147 <http://doi.org/10.1073/pnas.0812489106>
- 1148 Hayashi-Nishino, M., Fujita, N., Noda, T., Yamaguchi, A., Yoshimori, T., & Yamamoto,  
1149 A. (2009). A subdomain of the endoplasmic reticulum forms a cradle for  
1150 autophagosome formation. *Nature Cell Biology*, 11(12), 1433–1437.  
1151 <http://doi.org/10.1038/ncb1991>
- 1152 Helle, S. C. J., Kanfer, G., Kolar, K., Lang, A., Michel, A. H., & Kornmann, B. (2013).  
1153 Organization and function of membrane contact sites. *Biochimica et Biophysica*  
1154 *Acta - Molecular Cell Research*, 1833(11), 2526–2541.  
1155 <http://doi.org/10.1016/J.BBAMCR.2013.01.028>
- 1156 Hentze, M. W., Castello, A., Schwarzl, T., & Preiss, T. (2018). A brave new world of  
1157 RNA-binding proteins. *Nature Reviews Molecular Cell Biology*, 19(5), 327–341.  
1158 <http://doi.org/10.1038/nrm.2017.130>
- 1159 Hsu, J. C.-C., & Nicchitta, C. V. (2018). Proteome Expression: The Subcellular  
1160 Organisation of Protein Synthesis. *ELS*, 1–8.  
1161 <http://doi.org/10.1002/9780470015902.a0005718>
- 1162 Hsu, J. C. C., Reid, D. W., Hoffman, A. M., Sarkar, D., & Nicchitta, C. V. (2018).  
1163 Oncoprotein AEG-1 is an endoplasmic reticulum RNA-binding protein whose  
1164 interactome is enriched in organelle resident protein-encoding mRNAs. *RNA*, 24(5),  
1165 688–703. <http://doi.org/10.1261/rna.063313.117>
- 1166 Hudder, A., Nathanson, L., & Deutscher, M. P. (2003). Organization of Mammalian  
1167 Cytoplasm. *Molecular and Cellular Biology*, 23(24), 9318–9326.  
1168 <http://doi.org/10.1128/MCB.23.24.9318-9326.2003>
- 1169 Hung, V., Lam, S. S., Udeshi, N. D., Svinkina, T., Guzman, G., Mootha, V. K., ... Ting,  
1170 A. Y. (2017). Proteomic mapping of cytosol-facing outer mitochondrial and ER  
1171 membranes in living human cells by proximity biotinylation. *ELife*, 6.  
1172 <http://doi.org/10.7554/eLife.24463>
- 1173 Ichimura, T., Shindo, Y., Uda, Y., Ohsumi, T., Omata, S., & Sugano, H. (1993). Anti-  
1174 (p34 protein) antibodies inhibit ribosome binding to and protein translocation across  
1175 the rough microsomal membrane. *FEBS Letters*, 326(1–3), 241–245.

- 1176 [http://doi.org/10.1016/0014-5793\(93\)81799-6](http://doi.org/10.1016/0014-5793(93)81799-6)
- 1177 Jagannathan, S., Hsu, J. C. C., Reid, D. W., Chen, Q., Thompson, W. J., Moseley, A.  
1178 M., & Nicchitta, C. V. (2014). Multifunctional Roles for the Protein Translocation  
1179 Machinery in RNA Anchoring to the Endoplasmic Reticulum. *Journal of Biological*  
1180 *Chemistry*, 289(37), 25907–25924. <http://doi.org/10.1074/jbc.M114.580688>
- 1181 Jagannathan, S., Nwosu, C., & Nicchitta, C. V. (2011). Analyzing mRNA Localization to  
1182 the Endoplasmic Reticulum via Cell Fractionation. In J. E. Gerst (Ed.), *RNA*  
1183 *Detection and Visualization: Methods and Protocols* (Vol. 714, pp. 301–321).  
1184 [http://doi.org/10.1007/978-1-61779-005-8\\_19](http://doi.org/10.1007/978-1-61779-005-8_19)
- 1185 Jan, C. H., Williams, C. C., & Weissman, J. S. (2014). Principles of ER cotranslational  
1186 translocation revealed by proximity-specific ribosome profiling. *Science*, 346(6210),  
1187 1257521. <http://doi.org/10.1126/science.1257521>
- 1188 Jan, C. H., Williams, C. C., & Weissman, J. S. (2015). Response to Comment on  
1189 “Principles of ER cotranslational translocation revealed by proximity-specific  
1190 ribosome profiling.” *Science*, 348(6240), 1217–b.  
1191 <http://doi.org/10.1126/science.1257521>
- 1192 Jing, J., He, L., Sun, A., Quintana, A., Ding, Y., Ma, G., ... Zhou, Y. (2015). Proteomic  
1193 mapping of ER-PM junctions identifies STIMATE as a regulator of Ca(2+) influx.  
1194 *Nature Cell Biology*, 17(10), 1339–1347. <http://doi.org/10.1038/ncb3234>
- 1195 Johnson, A. E., & van Waes, M. A. (1999). The translocon: a dynamic gateway at the  
1196 ER membrane. *Annual Review of Cell and Developmental Biology*, 15, 799–842.  
1197 <http://doi.org/10.1146/annurev.cellbio.15.1.799>
- 1198 Kalies, K.-U., Görlich, D., & Rapoport, T. A. (1994). Binding of ribosomes to the rough  
1199 endoplasmic reticulum mediated by the Sec61p-complex. *The Journal of Cell*  
1200 *Biology*, 126(4), 925–934. <http://doi.org/10.1083/jcb.126.4.925>
- 1201 Kim, D. I., Birendra, K., Zhu, W., Motamedchaboki, K., Doye, V., & Roux, K. J. (2014).  
1202 Probing nuclear pore complex architecture with proximity-dependent biotinylation.  
1203 *Proceedings of the National Academy of Sciences*, 111(24), E2453–E2461.  
1204 <http://doi.org/10.1073/pnas.1406459111>
- 1205 Kim, D., Langmead, B., & Salzberg, S. L. (2015). HISAT: a fast spliced aligner with low  
1206 memory requirements. *Nature Methods*, 12(4), 357–360.  
1207 <http://doi.org/10.1038/nmeth.3317>
- 1208 Kreibich, G., Freienstein, C. M., Pereyra, B. N., Ulrich, B. L., & Sabatini, D. D. (1978).  
1209 Proteins of rough microsomal membranes related to ribosome binding. II. Cross-  
1210 linking of bound ribosomes to specific membrane proteins exposed at the binding  
1211 sites. *The Journal of Cell Biology*, 77(2), 488–506.  
1212 <http://doi.org/10.1083/jcb.77.2.488>
- 1213 Kusumi, A., Fujiwara, T. K., Chadda, R., Xie, M., Tsunoyama, T. A., Kalay, Z., ...  
1214 Suzuki, K. G. N. (2012). Dynamic Organizing Principles of the Plasma Membrane  
1215 that Regulate Signal Transduction: Commemorating the Fortieth Anniversary of  
1216 Singer and Nicolson’s Fluid-Mosaic Model. *Annual Review of Cell and*  
1217 *Developmental Biology*, 28(1), 215–250. [http://doi.org/10.1146/annurev-cellbio-](http://doi.org/10.1146/annurev-cellbio-100809-151736)  
1218 [100809-151736](http://doi.org/10.1146/annurev-cellbio-100809-151736)
- 1219 Kusumi, A., Suzuki, K. G. N., Kasai, R. S., Ritchie, K., & Fujiwara, T. K. (2011).  
1220 Hierarchical mesoscale domain organization of the plasma membrane. *Trends in*  
1221 *Biochemical Sciences*, 36(11), 604–615. <http://doi.org/10.1016/j.tibs.2011.08.001>

- 1222 Kwon, K., & Beckett, D. (2000). Function of a conserved sequence motif in biotin  
1223 holoenzyme synthetases. *Protein Science*, 9(8), 1530–1539.  
1224 <http://doi.org/10.1110/ps.9.8.1530>
- 1225 Lang, S., Benedix, J., Fedeles, S. V, Schorr, S., Schirra, C., Schäuble, N., ...  
1226 Haßdenteufel, S. (2012). Different effects of Sec61 $\alpha$ , Sec62 and Sec63 depletion  
1227 on transport of polypeptides into the endoplasmic reticulum of mammalian cells.  
1228 *Journal of Cell Science*, 125(8), 1958–1969. <http://doi.org/10.1242/jcs.096727>
- 1229 Levy, R., Wiedmann, M., & Kreibich, G. (2001). In Vitro Binding of Ribosomes to the  $\beta$   
1230 Subunit of the Sec61p Protein Translocation Complex. *Journal of Biological*  
1231 *Chemistry*, 276(4), 2340–2346. <http://doi.org/10.1074/jbc.M004867200>
- 1232 Lin, P. J., Jongsma, C. G., Pool, M. R., & Johnson, A. E. (2011). Polytropic membrane  
1233 protein folding at L17 in the ribosome tunnel initiates cyclical changes at the  
1234 translocon. *Journal of Cell Biology*, 195(1), 55–70.  
1235 <http://doi.org/10.1083/jcb.201103118>
- 1236 Love, M. I., Huber, W., & Anders, S. (2014). Moderated estimation of fold change and  
1237 dispersion for RNA-seq data with DESeq2. *Genome Biology*, 15(12), 550.  
1238 <http://doi.org/10.1186/s13059-014-0550-8>
- 1239 Lynes, E. M., & Simmen, T. (2011). Urban planning of the endoplasmic reticulum (ER):  
1240 how diverse mechanisms segregate the many functions of the ER. *Biochimica et*  
1241 *Biophysica Acta - Molecular Cell Research*, 1813(10), 1893–905.  
1242 <http://doi.org/10.1016/j.bbamcr.2011.06.011>
- 1243 Matasova, N. B., Myltseva, S. V, Zenkova, M. A., Graifer, D. M., Vladimirov, S. N., &  
1244 Karpova, G. G. (1991). Isolation of ribosomal subunits containing intact rRNA from  
1245 human placenta: Estimation of functional activity of 80S ribosomes. *Analytical*  
1246 *Biochemistry*, 198(2), 219–223. [http://doi.org/10.1016/0003-2697\(91\)90416-Q](http://doi.org/10.1016/0003-2697(91)90416-Q)
- 1247 Mauro, V. P., & Edelman, G. M. (2002). The ribosome filter hypothesis. *Proceedings of*  
1248 *the National Academy of Sciences*, 99(19), 12031–12036.  
1249 <http://doi.org/10.1073/pnas.192442499>
- 1250 Migliaccio, G., Nicchitta, C. V, & Blobel, G. (1992). The signal sequence receptor, unlike  
1251 the signal recognition particle receptor, is not essential for protein translocation.  
1252 *The Journal of Cell Biology*, 117(1), 15–25. <http://doi.org/10.1083/JCB.117.1.15>
- 1253 Mueckler, M. M., & Pitot, H. C. (1981). Structure and function of rat liver polysome  
1254 populations. I. Complexity, frequency distribution, and degree of uniqueness of free  
1255 and membrane-bound polysomal polyadenylate-containing RNA populations. *The*  
1256 *Journal of Cell Biology*, 90(2), 495–506. <http://doi.org/10.1083/jcb.90.2.495>
- 1257 Müller, L., de Escauriaza, M. D., Lajoie, P., Theis, M., Jung, M., Müller, A., ...  
1258 Zimmermann, R. (2010). Evolutionary Gain of Function for the ER Membrane  
1259 Protein Sec62 from Yeast to Humans. *Molecular Biology of the Cell*, 21(5), 691–  
1260 703. <http://doi.org/10.1091/mbc.E09-08-0730>
- 1261 Nikonov, A. V, Snapp, E., Lippincott-Schwartz, J., & Kreibich, G. (2002). Active  
1262 translocon complexes labeled with GFP-Dad1 diffuse slowly as large polysome  
1263 arrays in the endoplasmic reticulum. *The Journal of Cell Biology*, 158(3), 497–506.  
1264 <http://doi.org/10.1083/jcb.200201116>
- 1265 Ogawa-Goto, K., Tanaka, K., Ueno, T., Tanaka, K., Kurata, T., Sata, T., & Irie, S.  
1266 (2007). p180 Is Involved in the Interaction between the Endoplasmic Reticulum and  
1267 Microtubules through a Novel Microtubule-binding and Bundling Domain. *Molecular*

- 1268 *Biology of the Cell*, 18(10), 3741–3751. <http://doi.org/10.1091/mbc.E06-12-1125>
- 1269 Ohsumi, T., Ichimura, T., Sugano, H., Omata, S., Isobe, T., & Kuwano, R. (1993).
- 1270 Ribosome-binding protein p34 is a member of the leucine-rich-repeat-protein
- 1271 superfamily. *Biochemical Journal*, 294(2), 465–472.
- 1272 <http://doi.org/10.1042/bj2940465>
- 1273 Pfeffer, S., Burbaum, L., Unverdorben, P., Pech, M., Chen, Y., Zimmermann, R., ...
- 1274 Förster, F. (2015). Structure of the native Sec61 protein-conducting channel.
- 1275 *Nature Communications*, 6, 8403. <http://doi.org/10.1038/ncomms9403>
- 1276 Pfeffer, S., Dudek, J., Gogala, M., Schorr, S., Linxweiler, J., Lang, S., ... Förster, F.
- 1277 (2014). Structure of the mammalian oligosaccharyl-transferase complex in the
- 1278 native ER protein translocon. *Nature Communications*, 5, 3072.
- 1279 <http://doi.org/10.1038/ncomms4072>
- 1280 Potter, M. D., & Nicchitta, C. V. (2000). Ribosome-independent regulation of translocon
- 1281 composition and Sec61 alpha conformation. *Journal of Biological Chemistry*,
- 1282 275(3), 2037–2045. <http://doi.org/10.1074/jbc.275.3.2037>
- 1283 Prinz, A., Behrens, C., Rapoport, T. A., Hartmann, E., & Kalies, K. (2000). Evolutionarily
- 1284 conserved binding of ribosomes to the translocation channel via the large ribosomal
- 1285 RNA. *European Molecular Biology Organization*, 19(8), 1900–1906.
- 1286 <http://doi.org/10.1093/emboj/19.8.1900>
- 1287 Rees, J. S., Li, X.-W., Perrett, S., Lilley, K. S., & Jackson, A. P. (2015). Protein
- 1288 Neighbors and Proximity Proteomics. *Molecular & Cellular Proteomics*, 14(11),
- 1289 2848–2856. <http://doi.org/10.1074/mcp.R115.052902>
- 1290 Reid, D. W., & Nicchitta, C. V. (2012). Primary Role for Endoplasmic Reticulum-bound
- 1291 Ribosomes in Cellular Translation Identified by Ribosome Profiling. *Journal of*
- 1292 *Biological Chemistry*, 287(8), 5518–5527. <http://doi.org/10.1074/jbc.M111.312280>
- 1293 Reid, D. W., & Nicchitta, C. V. (2015). Diversity and selectivity in mRNA translation on
- 1294 the endoplasmic reticulum. *Nature Reviews Molecular Cell Biology*, 16(4), 221–
- 1295 231. <http://doi.org/10.1038/nrm3958>
- 1296 Ritchie, C., Cylinder, I., Platt, E. J., & Barklis, E. (2015). Analysis of HIV-1 Gag Protein
- 1297 Interactions via Biotin Ligase Tagging. *Journal of Virology*, 89(7), 3988–4001.
- 1298 <http://doi.org/10.1128/JVI.03584-14>
- 1299 Roux, K. J., Kim, D. I., Raida, M., & Burke, B. (2012). A promiscuous biotin ligase fusion
- 1300 protein identifies proximal and interacting proteins in mammalian cells. *The Journal*
- 1301 *of Cell Biology*, 196(6), 801–810. <http://doi.org/10.1083/jcb.201112098>
- 1302 Savitz, A. J., & Meyer, D. I. (1990). Identification of a ribosome receptor in the rough
- 1303 endoplasmic reticulum. *Nature*, 346(6284), 540–544.
- 1304 <http://doi.org/10.1038/346540a0>
- 1305 Savitz, A. J., & Meyer, D. I. (1997). Receptor-mediated Ribosome Binding to Liposomes
- 1306 Depends on Lipid Composition. *Journal of Biological Chemistry*, 272(20), 13140–
- 1307 13145. <http://doi.org/10.1074/jbc.272.20.13140>
- 1308 Schaletzky, J., & Rapoport, T. A. (2006). Ribosome Binding to and Dissociation from
- 1309 Translocation Sites of the Endoplasmic Reticulum Membrane. *Molecular Biology of*
- 1310 *the Cell*, 17(9), 3860–3869. <http://doi.org/10.1091/mbc.E06-05-0439>
- 1311 Schwarz, D. S., & Blower, M. D. (2016). The endoplasmic reticulum: structure, function
- 1312 and response to cellular signaling. *Cellular and Molecular Life Sciences*, 73(1), 79–
- 1313 94. <http://doi.org/10.1007/s00018-015-2052-6>

- 1314 Shannon, P., Markiel, A., Ozier, O., Baliga, N. S., Wang, J. T., Ramage, D., ... Ideker,  
1315 T. (2003). Cytoscape: a software environment for integrated models of  
1316 biomolecular interaction networks. *Genome Research*, 13(11), 2498–504.  
1317 <http://doi.org/10.1101/gr.1239303>
- 1318 Shi, Z., Fujii, K., Kovary, K. M., Genuth, N. R., Röst, H. L., Teruel, M. N., & Barna, M.  
1319 (2017). Heterogeneous Ribosomes Preferentially Translate Distinct Subpools of  
1320 mRNAs Genome-wide. *Molecular Cell*, 67(1), 71–83.e7.  
1321 <http://doi.org/10.1016/j.molcel.2017.05.021>
- 1322 Shibatani, T., David, L. L., McCormack, A. L., Frueh, K., & Skach, W. R. (2005).  
1323 Proteomic Analysis of Mammalian Oligosaccharyltransferase Reveals Multiple  
1324 Subcomplexes that Contain Sec61, TRAP, and Two Potential New Subunits†.  
1325 *Biochemistry*, 44(16), 5982–5992. <http://doi.org/10.1021/bi047328f>
- 1326 Singer, A. S. J., & Nicolson, G. L. (1972). The Fluid Mosaic Model of the Structure of  
1327 Cell Membranes. *Science*, 175(4023), 720–731.  
1328 <http://doi.org/10.1126/science.175.4023.720>
- 1329 Stephens, S. B., & Nicchitta, C. V. (2007). In vitro and tissue culture methods for  
1330 analysis of translation initiation on the endoplasmic reticulum. In J. Lorsch (Ed.),  
1331 *Translation Initiation: Cell Biology, High-Throughput Methods, and Chemical-Based*  
1332 *Approaches* (Vol. 431, pp. 47–60). [http://doi.org/10.1016/s0076-6879\(07\)31004-5](http://doi.org/10.1016/s0076-6879(07)31004-5)
- 1333 Stephens, S. B., & Nicchitta, C. V. (2008). Divergent regulation of protein synthesis in  
1334 the cytosol and endoplasmic reticulum compartments of mammalian cells.  
1335 *Molecular Biology of the Cell*, 19(2), 623–632. <http://doi.org/10.1091/mbc.E07-07-0677>
- 1336
- 1337 Szklarczyk, D., Morris, J. H., Cook, H., Kuhn, M., Wyder, S., Simonovic, M., ...  
1338 von Mering, C. (2017). The STRING database in 2017: quality-controlled protein–  
1339 protein association networks, made broadly accessible. *Nucleic Acids Research*,  
1340 45(D1), D362–D368. <http://doi.org/10.1093/nar/gkw937>
- 1341 Tazawa, S., Unuma, M., Tondokoro, N., Asano, Y., Ohsumi, T., Ichimura, T., & Sugano,  
1342 H. (1991). Identification of a Membrane Protein Responsible for Ribosome Binding  
1343 in Rough Microsomal Membranes. *Journal of Biochemistry*, 109(1), 89–98.  
1344 Retrieved from <http://jb.oxfordjournals.org/content/109/1/89.abstract>
- 1345 Ueda, S., Blee, A. M., Macway, K. G., Renner, D. J., & Yamada, S. (2015). Force  
1346 Dependent Biotinylation of Myosin IIA by  $\alpha$ -Catenin Tagged with a Promiscuous  
1347 Biotin Ligase. *PLoS ONE*, 10(3), e0122886.  
1348 <http://doi.org/10.1371/journal.pone.0122886>
- 1349 Ueno, T., Kaneko, K., Sata, T., Hattori, S., & Ogawa-Goto, K. (2012). Regulation of  
1350 polysome assembly on the endoplasmic reticulum by a coiled-coil protein, p180.  
1351 *Nucleic Acids Research*, 40(7), 3006–3017. <http://doi.org/10.1093/nar/gkr1197>
- 1352 Uezu, A., Kanak, D., Bradshaw, T., Soderblom, E., Catavero, C., Burette, A., ...  
1353 Soderling SH. (2016). Identification of an elaborate complex mediating postsynaptic  
1354 inhibition. *Science*, 353(6304), 1123–1129. <http://doi.org/10.1126/science.aaf1836>
- 1355 Valm, A. M., Cohen, S., Legant, W. R., Melunis, J., Hershberg, U., Wait, E., ...  
1356 Lippincott-Schwartz, J. (2017). Applying systems-level spectral imaging and  
1357 analysis to reveal the organelle interactome. *Nature*, 546(7656), 162–167.  
1358 <http://doi.org/10.1038/nature22369>
- 1359 Vance, J. E. (2014). MAM (mitochondria-associated membranes) in mammalian cells:

- 1360 Lipids and beyond. *Biochimica et Biophysica Acta - Molecular and Cell Biology of*  
1361 *Lipids*, 1841(4), 595–609. <http://doi.org/10.1016/J.BBALIP.2013.11.014>
- 1362 Varnaité, R., & MacNeill, S. A. (2016). Meet the neighbors: Mapping local protein  
1363 interactomes by proximity-dependent labeling with BioID. *PROTEOMICS*, 16(19),  
1364 2503–2518. <http://doi.org/10.1002/pmic.201600123>
- 1365 Vembar, S. S., & Brodsky, J. L. (2008). One step at a time: endoplasmic reticulum-  
1366 associated degradation. *Nature Reviews Molecular Cell Biology*, 9(12), 944–957.  
1367 <http://doi.org/10.1038/nrm2546>
- 1368 Voigt, F., Zhang, H., Cui, X. A., Triebold, D., Liu, A. X., Eglinger, J., ... Palazzo, A. F.  
1369 (2017). Single-Molecule Quantification of Translation-Dependent Association of  
1370 mRNAs with the Endoplasmic Reticulum. *Cell Reports*, 21(13), 3740–3753.  
1371 <http://doi.org/10.1016/j.celrep.2017.12.008>
- 1372 Voorhees, R. M., Fernández, I. S., Scheres, S. H., & Hegde, R. S. (2014). Structure of  
1373 the Mammalian Ribosome-Sec61 Complex to 3.4 Å Resolution. *Cell*, 157(7), 1632–  
1374 1643. <http://doi.org/10.1016/j.cell.2014.05.024>
- 1375 Walter, P., & Blobel, G. (1980). Purification of a membrane-associated protein complex  
1376 required for protein translocation across the endoplasmic reticulum. *Proceedings of*  
1377 *the National Academy of Sciences*, 77(12), 7112–6.  
1378 <http://doi.org/10.1073/pnas.77.12.7112>
- 1379 Walter, P., & Blobel, G. (1982, October 21). Signal recognition particle contains a 7S  
1380 RNA essential for protein translocation across the endoplasmic reticulum. *Nature*.  
1381 Nature Publishing Group. <http://doi.org/10.1038/299691a0>
- 1382 Wang, H., & Stefanovic, B. (2014). Role of LARP6 and Nonmuscle Myosin in  
1383 Partitioning of Collagen mRNAs to the ER Membrane. *PLoS ONE*, 9(10), e108870.  
1384 <http://doi.org/10.1371/journal.pone.0108870>
- 1385 Wild, R., Kowal, J., Eyring, J., Ngwa, E. M., Aebi, M., & Locher, K. P. (2018). Structure  
1386 of the yeast oligosaccharyltransferase complex gives insight into eukaryotic N-  
1387 glycosylation. *Science*, 359(6375), 545–550.  
1388 <http://doi.org/10.1126/science.aar5140>
- 1389 Wilson, D. N., & Doudna Cate, J. H. (2012). The structure and function of the eukaryotic  
1390 ribosome. *Cold Spring Harbor Perspectives in Biology*, 4(5), a011536.  
1391 <http://doi.org/10.1101/cshperspect.a011536>
- 1392 Wu, B., Eliscovich, C., Yoon, Y. J., & Singer, R. H. (2016). Translation dynamics of  
1393 single mRNAs in live cells and neurons. *Science*, 352(6292), 1430–1435.  
1394 <http://doi.org/10.1126/science.aaf1084>
- 1395 Youn, J.-Y., Dunham, W. H., Hong, S. J., Knight, J. D. R., Bashkurov, M., Chen, G. I.,  
1396 ... Gingras, A.-C. (2018). High-Density Proximity Mapping Reveals the Subcellular  
1397 Organization of mRNA-Associated Granules and Bodies. *Molecular Cell*, 1–16.  
1398 <http://doi.org/10.1016/j.molcel.2017.12.020>
- 1399 Zhang, Y., Wölfle, T., & Rospert, S. (2013). Interaction of nascent chains with the  
1400 ribosomal tunnel proteins Rpl4, Rpl17, and Rpl39 of *Saccharomyces cerevisiae*.  
1401 *Journal of Biological Chemistry*, 288(47), 33697–707.  
1402 <http://doi.org/10.1074/jbc.M113.508283>
- 1403

1404

1405 **SOURCE DATA FILES:**

1406 **REVIEWER ACCESS TO GEO ARCHIVED FASTQ FILES:** *A secure token has been*

1407 *created to allow review of record GSE118873 while it remains in private status:*

1408 **Figure 8-linked proteomics:** Files containing all membrane protein raw MS data are  
1409 provided as Scaffold files, file name: Figure 8 – source data 1 and 2.

1410

1411 **Figure 11-linked proteomics:** File containing all ribosomal protein raw MS data is  
1412 contained in a Scaffold file, file name: Figure 11 – source data 1



## Figure Legends:

**Figure 1. Experimental approach to the analysis of ribosome interactors and localized translation on the endoplasmic reticulum (ER).** **A)** Schematic of experimental goals. Stable cell lines expressing inducible BirA\* fusion proteins of previously identified ribosome associated membrane proteins, listed in **(B)**, were prepared and used to determine the near-neighbor protein interactomes for each via the BioID method. In addition to determining candidate ribosome interactor protein neighborhoods, reporter-mediated ribosome labeling was examined. To define the transcriptomes present at each of the postulated ER translation centers, biotin-tagged, ER-associated ribosome were recovered by detergent solubilization and avidin affinity isolation. Transcriptome compositions were determined by RNA-seq. **B)** Summary listing of candidate ribosome-interacting proteins, proposed functions, and linked citation.

**Figure 2. BioID reporters display ER-restricted subcellular localization and biotin-labeling activity.** **A)** Immunofluorescence micrographs of each reporter cell line after 24 hours of doxycycline-induced expression (BirA channel) and overnight biotin treatment (streptavidin channel). The merged images reveal high coincidence of ER membrane figures and proximity labeling. Scale bar = 10  $\mu\text{m}$ . **B)** Immunofluorescence micrographs of each reporter cell line showing colocalization of the resident ER membrane protein marker (TRAP $\alpha$ ) and the biotin labeling pattern. Scale bar = 10  $\mu\text{m}$ . Data shown are representative of two biological replicates.

**Figure 3. Biochemical fractionation of BioID reporter cell lines demonstrates localization of the reporter constructs to the membrane fraction and highly enriched biotin tagging of membrane proteins.** **A)** BirA immunoblot depicting the localization of each construct to the membrane fraction of the detergent fractionated cells. **B)** BirA\*-mediated biotin labeling, depicted by streptavidin blot, reveals distinct labeling patterns for each cell line and high enrichment of the ER fraction over the cytosolic fraction. **C)** Cytosol and ER marker protein distribution in the cytosol and membrane fractions derived from the four BioID reporter cell lines. Cytosol marker =  $\beta$ -tubulin; ER marker = TRAP $\alpha$ . Data shown are representative of two biological replicates.

**Figure 3 – figure supplement 1. BioID constructs display similar hydrodynamic behavior to native complexes in glycerol gradient sedimentation analyses.** **A)** Immunoblot analysis of BioID reporter construct migration in glycerol gradient velocity sedimentation experiments, comparing migration behavior of native and BioID chimera for each BirA\*-chimera cell line. Analysis of native proteins. **B)** As in **(A)** but using BirA antisera to compare migration patterns of the BioID fusion proteins with the native protein. **C)** As in **(A)** but using an empty-vector control cell line, to compare migration patterns of native proteins as in panels **A** and **B**.

**Figure 4. The BioID labeling patterns of the reporter cell lines largely intensify, rather than diversify, over time.** **A)** Streptavidin blots of biotin labeling time courses are shown for each reporter cell lines. Also provided are line-intensity plots of selected time

points through the six hour (hr) labeling period. Indicated are the biotin treatment time periods. **-Doxy** represents a six hr biotin treatment without prior doxycycline treatment, to test for leaky expression. **B)** Cartoons depicting the two predicted models of membrane protein diffusion. The leftward schematic (random diffusion) model depicts a biological membrane in which proteins diffuse freely in the 2-D membrane plane, encountering targets by random collision. The rightward schematic (constrained diffusion model), predicts that an organizing force, be it protein-protein interaction, lipid-enriched domains, or both, enables the formation of distinct compartments where protein diffusion is restricted. Data depicted in **A)** is representative of two biological replicates.

**Figure 5. In the absence of *in situ*-like ER membrane organization and with *trans*-delivery of the reactive biotin intermediate, proximity-based selective labeling is abolished.** **A)** SDS-PAGE gel depicting an *in vitro* labeling experiment conducted with canine rough microsomes (RM) incubated in the presence of soluble, recombinant BirA\*. RM were incubated in the presence of an ATP regenerating system, biotin, and either BirA\* or PBS as indicated. Note that the general avidin labeling pattern mirrors the total protein when the reporter is present in *trans*. Asterisk indicates the BirA\*-GST fusion protein, which is biotinylated during its induction in *E.coli*. **B)** Lane intensity plots demonstrate a general increase at all molecular weights, indicating loss of specificity when the reporter is presented in *trans*. **C)** India ink stain of the blot above demonstrating equivalent protein loading for all samples. **D)** Lane intensity plot of the India ink stain, illustrating the overall similarity in the labeling of total accessible protein. Data shown are representative of two biological replicates.

**Figure 6. MS analysis of BioID-labeled proteins demonstrates a high labeling enrichment of membrane vs. cytoplasmic proteins.** **A)** Schematic depicting the data analysis pipeline and significance selection criteria. All MS experiments were performed in biological duplicate. **B)** Stack plots depicting the relative distributions of cellular localization for enriched and shared proteins from each cell line. The number of genes in each category is embedded in each bar, to enable comparisons between reporter cell lines.

**Figure 7. BioID reporters reside in distinct protein neighborhoods.** Cytoscape plots of enriched proteins for the Sec61 $\beta$ , LRRC59 and Ribophorin I BioID reporter cell lines reveal different functional enrichments for proximally labeled proteins. Center nodes indicate the chimera protein from each cell line while the surrounding nodes develop from the proteomic datasets. Sizes indicate ranked normalized counts with the largest nodes having the highest values. Green nodes indicate stable, well-characterized protein oligomeric complexes, dark blue nodes are proteins comprising the top GO category indicated underneath each plot and in the appended table. Asterisks denote proteins that are in both established oligomeric complexes and GO categories. Borders indicate whether the protein is a membrane or soluble protein.

**Figure 8. Shared proteins comprise the majority of the proteomic datasets and define common components of mesoscale-ordered ER membrane domains.** **A)** The

three chimera proteins, Ribophorin I (RPN1), LRRC59 and SEC61 $\beta$  (SEC61B), implicated in ribosome binding, with common, shared proteins. **B)** Cytoscape plot of shared proteins confirms several established protein-protein interactions from experimental evidence (dotted edge lines, bold lines if connected to a reporter node). Size of the nodes are based on highest normalized count from the shared reporters. Proteins shared by specific chimera are distinguished by the indicated color scheme. LRRC59 share more proteins with the SEC61B and RPN1 reporters than SEC62. Files containing all membrane protein raw MS data is contained in Scaffold files as Figure 8 – source data 1 and 2.

**Figure 9. BioID labeling kinetics of cytosolic and ER-bound ribosomes. A)** Streptavidin blots and related total protein analysis (india ink stains) of the ribosome pellets prepared from samples depicted in Figure 4. **B)** Quantification of the summed lane intensity from membrane-bound ribosome lanes, plotted against time of added biotin using data from the blots shown in panel **A**. **C** = cytosol, **M** = membrane, **MW** = relative molecular weight in kDa. Data depicted is representative of two biological replicates.

**Figure 10. BioID reporter labeling of ER-associated ribosomes in LRRC59 and Sec61 $\beta$  BioID reporter cell lines does not impair translation function. A)** Experimental schematic illustrating the biotin-tagged ribosome isolation and analysis protocol. **B)** Velocity sedimentation analysis of ribosomal small and large subunits derived from LRRC59 and Sec61 $\beta$  BioID reporter cell lines. Illustrated are the  $A_{254}$  traces, RNA gel micrographs depicting 18S and 28S rRNAs. Also illustrated are streptavidin blots of the small and large ribosomal subunits from the reporter cell lines, with 80S ribosomes as comparison. **C)** To determine if BioID-mediated biotinylation altered ribosome function, polyribosomes were fractionated by sucrose gradient velocity sedimentation and biotin-labeled protein distributions analyzed by streptavidin blots of the precipitated gradient fractions. RNA gels of the gradient fractions are included to confirm ribosome migration.

**Figure 11. MS analysis of biotin-labeled ribosomal proteins reveals distinct BioID labeling patterns, suggestive of restricted steric interactions with the BioID reporters. A)** MS/MS identified ribosomal proteins were mapped onto a PDB structure of the ribosome bound to the translocon (PDB: 3J7R). High confidence biotin labeled ribosomal proteins are mapped to the ribosome and several ribosomal features are labeled for orientation. MS experiments were performed in biological duplicate. **B)** Table of the five ribosomal proteins identified from the mass spec datasets with high confidence. Files containing all membrane protein raw MS data is contained in Scaffold files as Figure 11 – source data 1

**Figure 12. RNA-seq analysis of BioID reporter-labeled polysomes shows divergent transcriptomes and demonstrates that ER ribosomes engage in the translation of cytosolic and secretory protein-encoding RNAs. A)** Schematic of experimental protocol for capturing biotin-labeled polysomes. **B)** Final subcellular distributions of **proteins** encoded by ribosome-associated RNAs. Stack plots of RNA-seq TPM reveal an enrichment for organellar membrane proteins (DeepLoc1.0) compared to the total

mRNA distribution by TPM for membrane and total cell (LocTree3, using datasets from (Reid and Nicchitta, 2012). The transcriptomes from Sec61 $\beta$  and LRRC59 labeled ribosomes diverge from the total and secretory/membrane distributions, and from one another. **C)** TPM analysis of the enriched and shared mRNAs for the Sec61 $\beta$  datasets showing both subcellular distributions and membrane prediction of the encoded proteins. **D)** TPM analysis of the enriched and shared mRNAs for the LRRC59 datasets showing both subcellular distributions and membrane prediction of the encoded proteins. Plasma membrane (PM); Transcripts per million (TPM). **E)** Read count analysis of raw counts shown for each of the datasets by percentage of those that aligned to the human genome and counted by htseq-count as described in the methods. **F)** Table of top ten genes by fold change value for enriched and shared datasets color coded by fold enrichment over the control datasets.

**Figure 12 – figure supplement 1. Quality control checks for replicates in RNA-seq libraries. (A-C)** log<sub>2</sub> transformed counts from RNA-Seq datasets of biological replicates in the analysis are plotted, revealing high similarity between biological duplicated. Red lines represent regression lines plotted to reveal variation from the midline (black). Pearson correlation coefficient at 95% confidence is shown in upper left part of the graph. **(D)** Raw counts of datasets aligned to the humanized BirA construct sequence used for the BioID chimera demonstrating expression of the BioID chimera and background mapping frequencies in the empty vector lines.

A

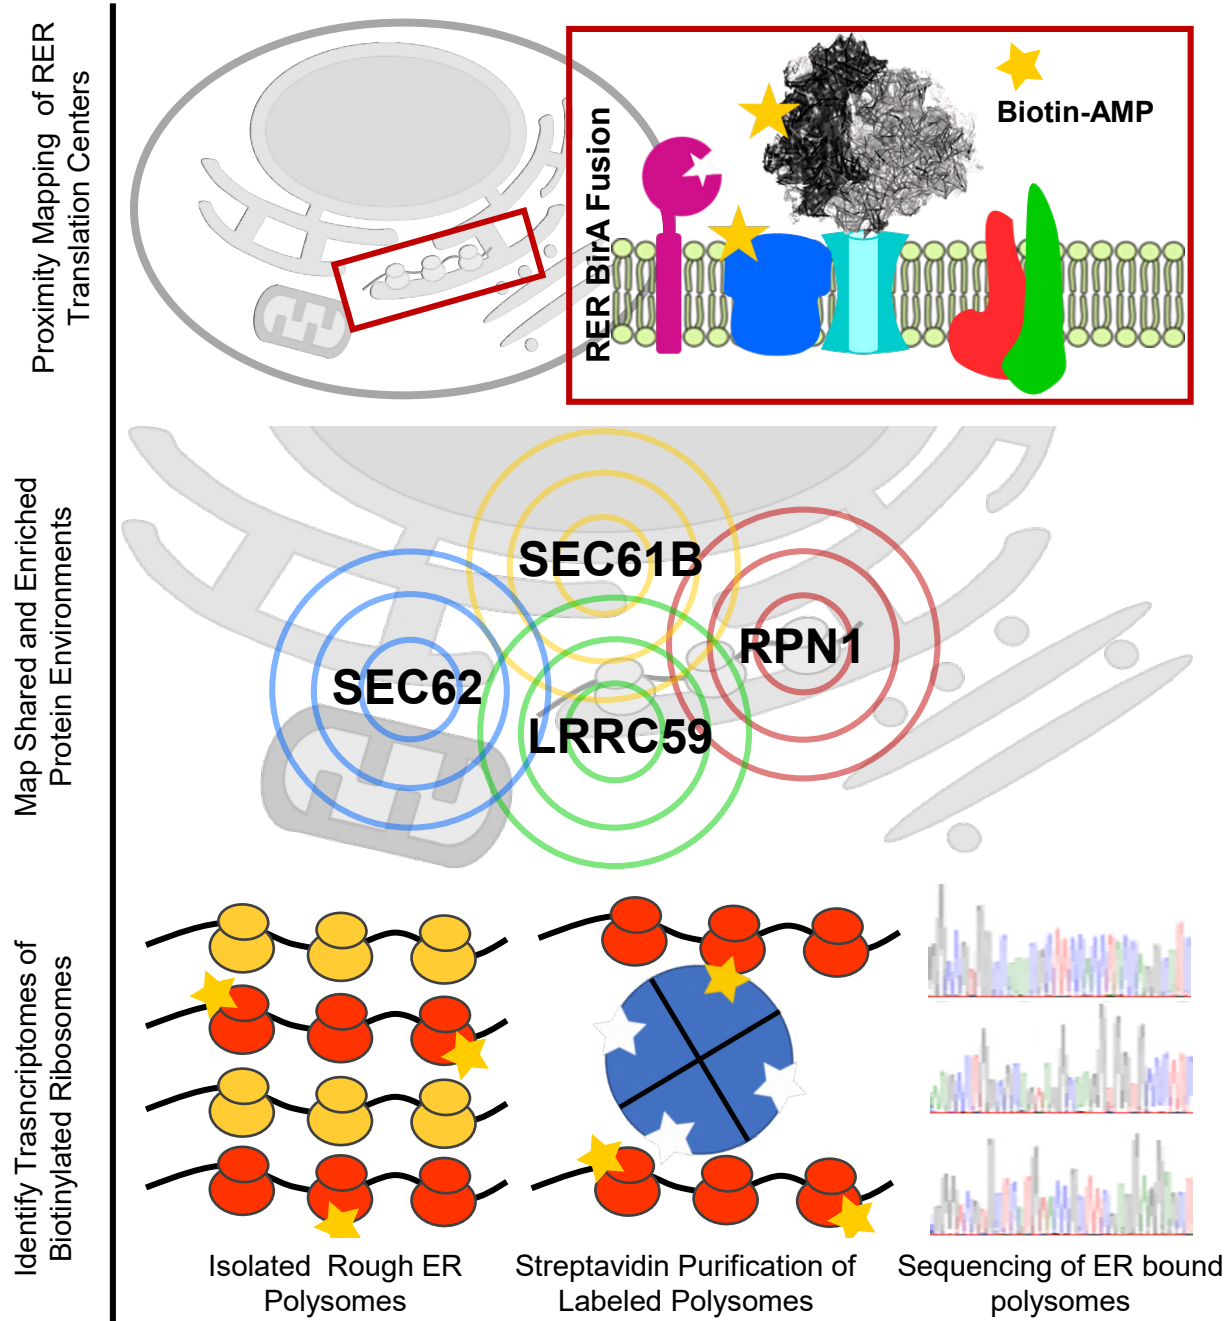

B

| BirA-Fusion                | Proposed Cellular Function       | Citation                                           |
|----------------------------|----------------------------------|----------------------------------------------------|
| Sec61 $\alpha$ /Translocon | Translocon Complex               | Gorlich D et al (1992) Cell. 71:489-503.           |
| Sec61 $\beta$              | Translocon Complex               | Levy R et al. (2001) JBC. 4:2340-2346.             |
| Ribophorin I               | Oligosaccharyl transferase       | Kreibich G et al. (1978) JCB. 77: 488-506.         |
| LRRRC59                    | Ribosome receptor                | Tazawa S et al. (1991) JBC. 109: 89-98.            |
| Sec62                      | Post-translational translocation | Muller L et al. (2010). Mol Biol Cell. 21: 691-703 |

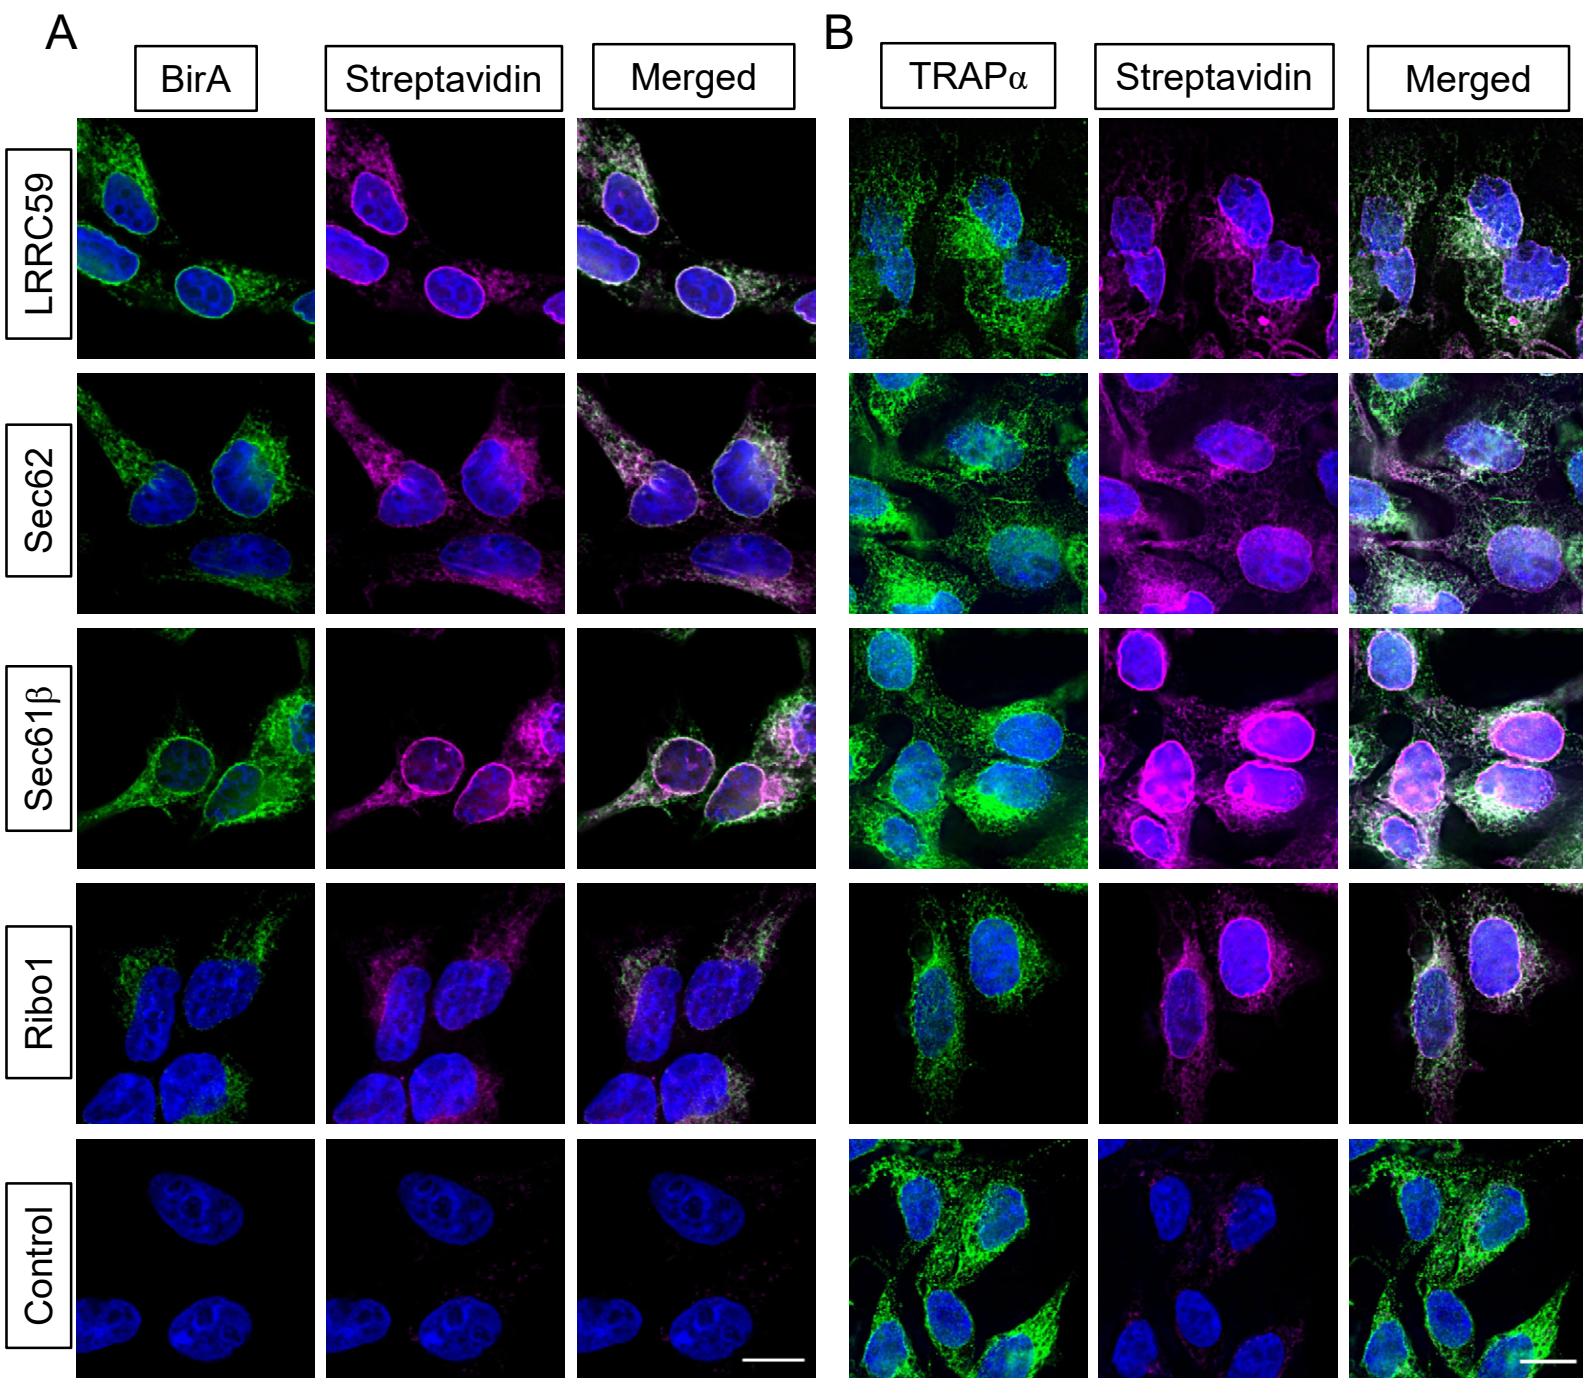

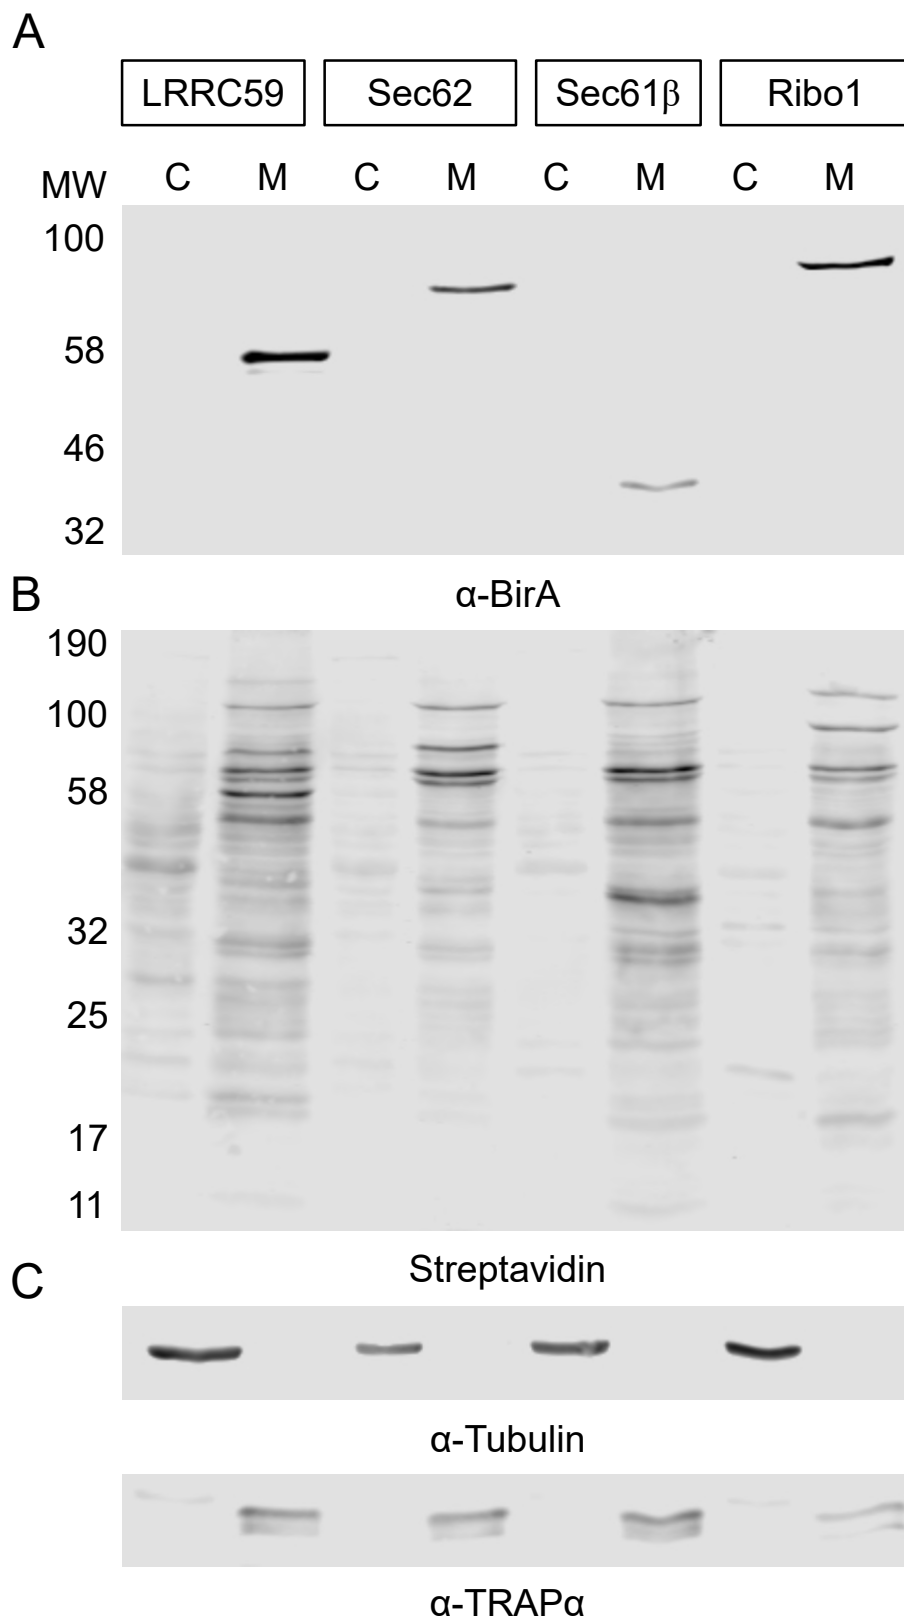

Figure 3 – figure supplement 1, Hoffman and Nicchitta

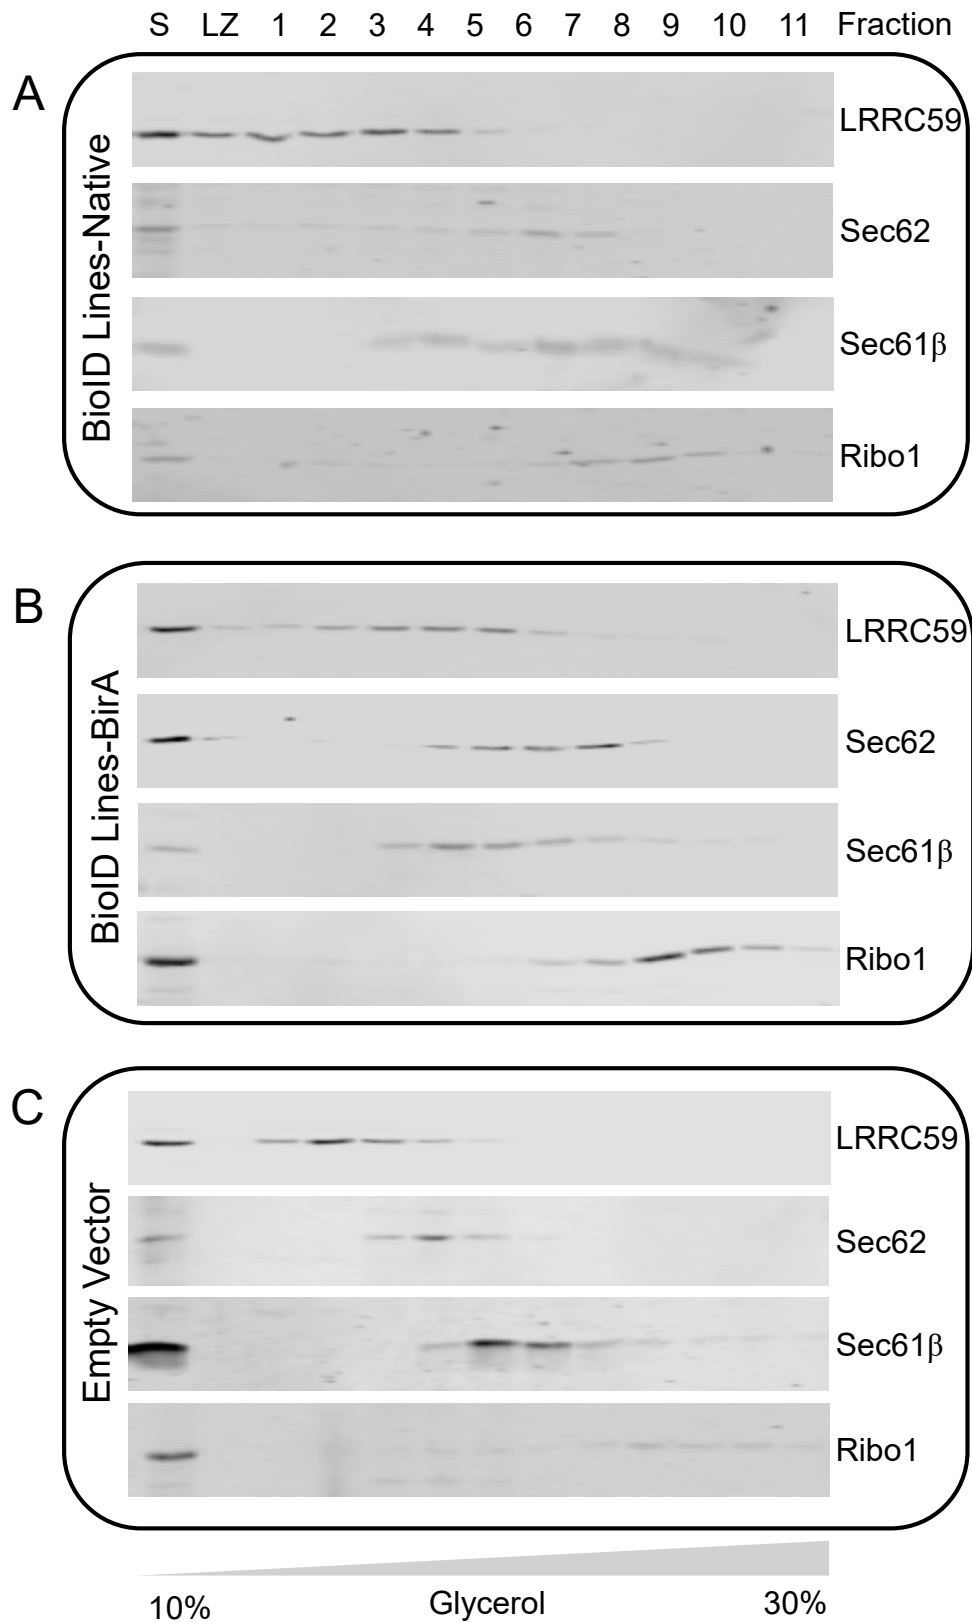



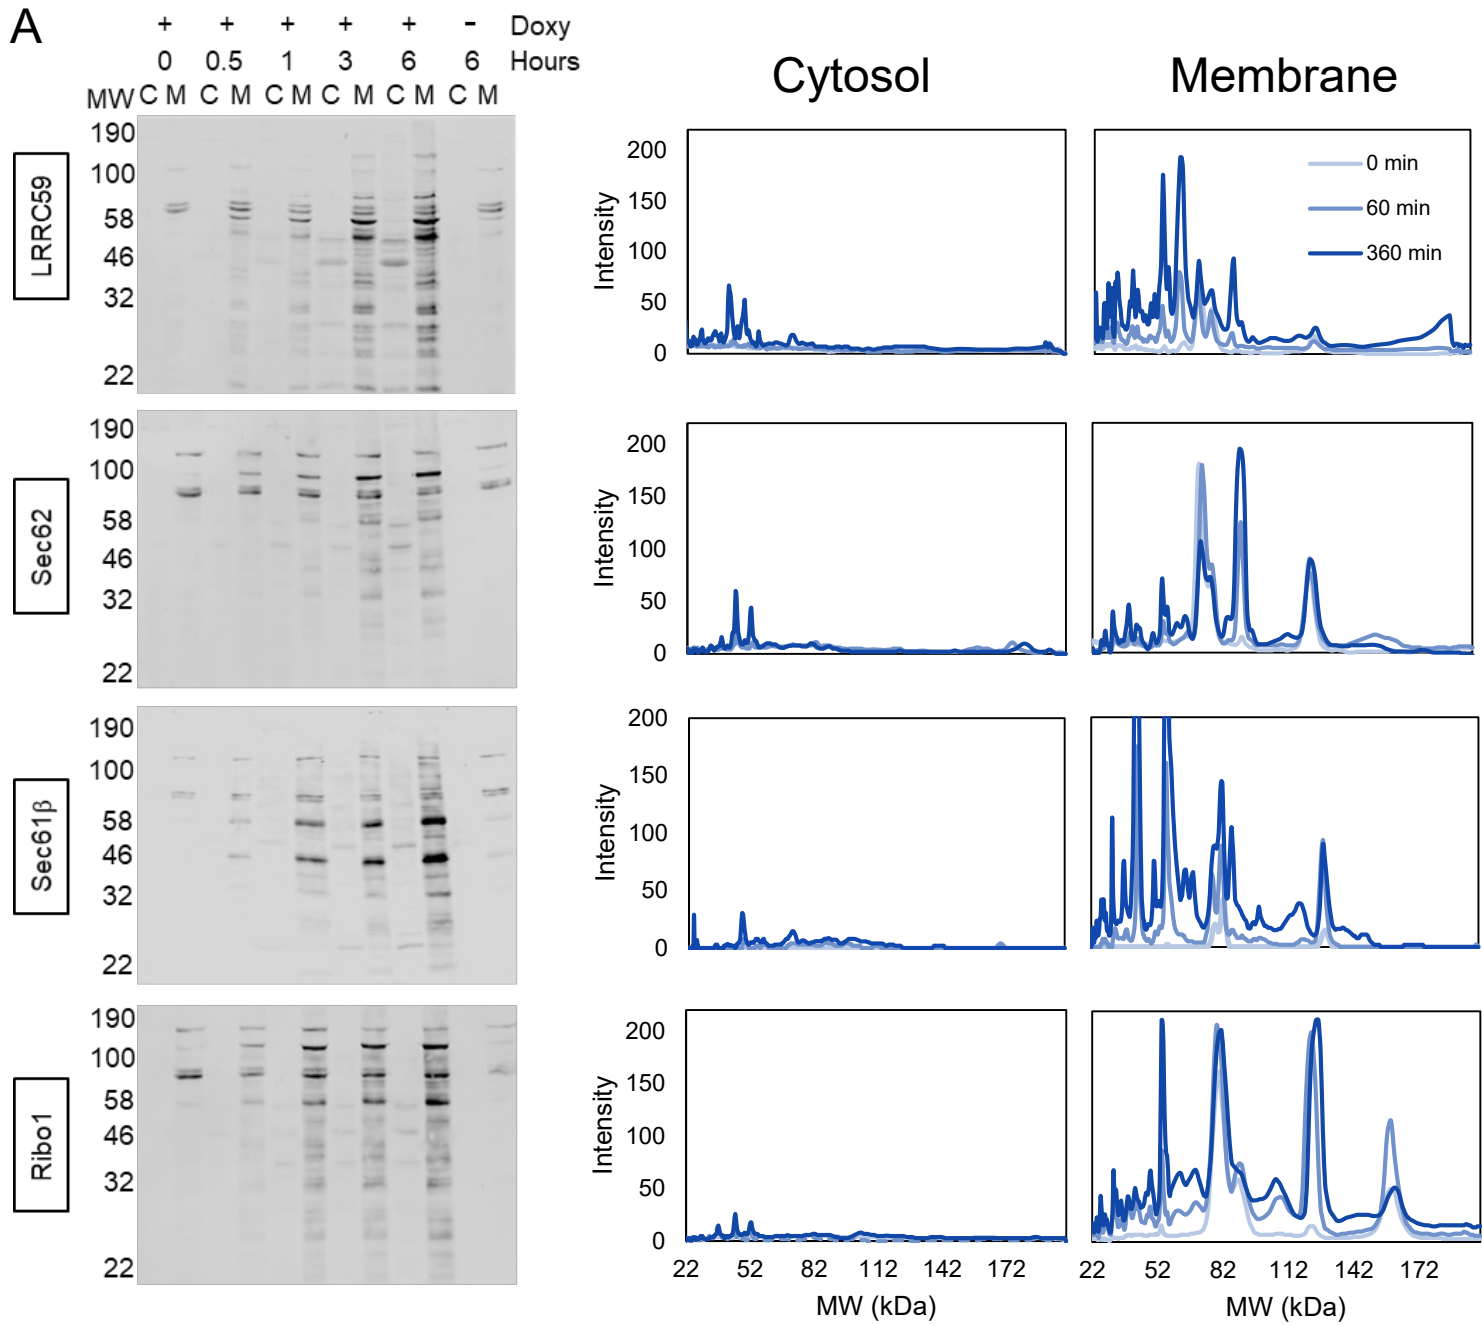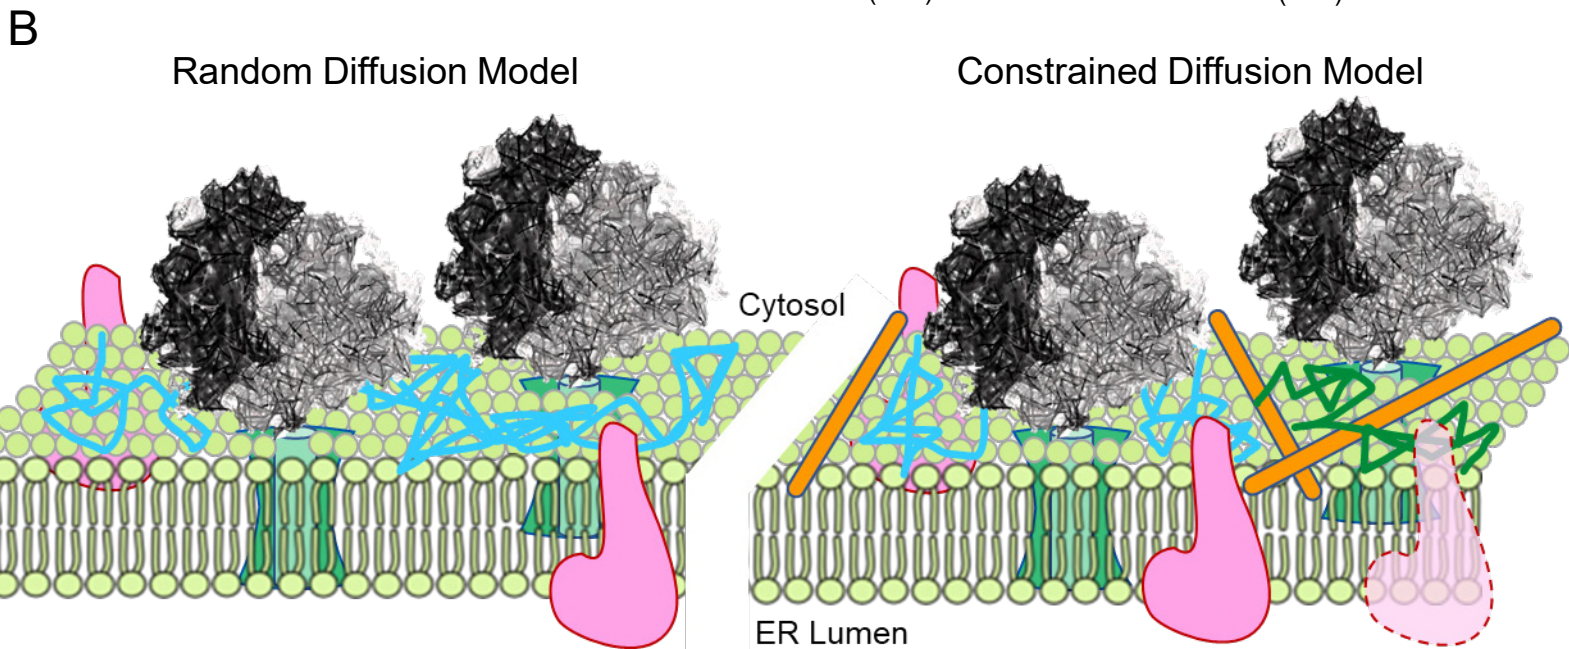

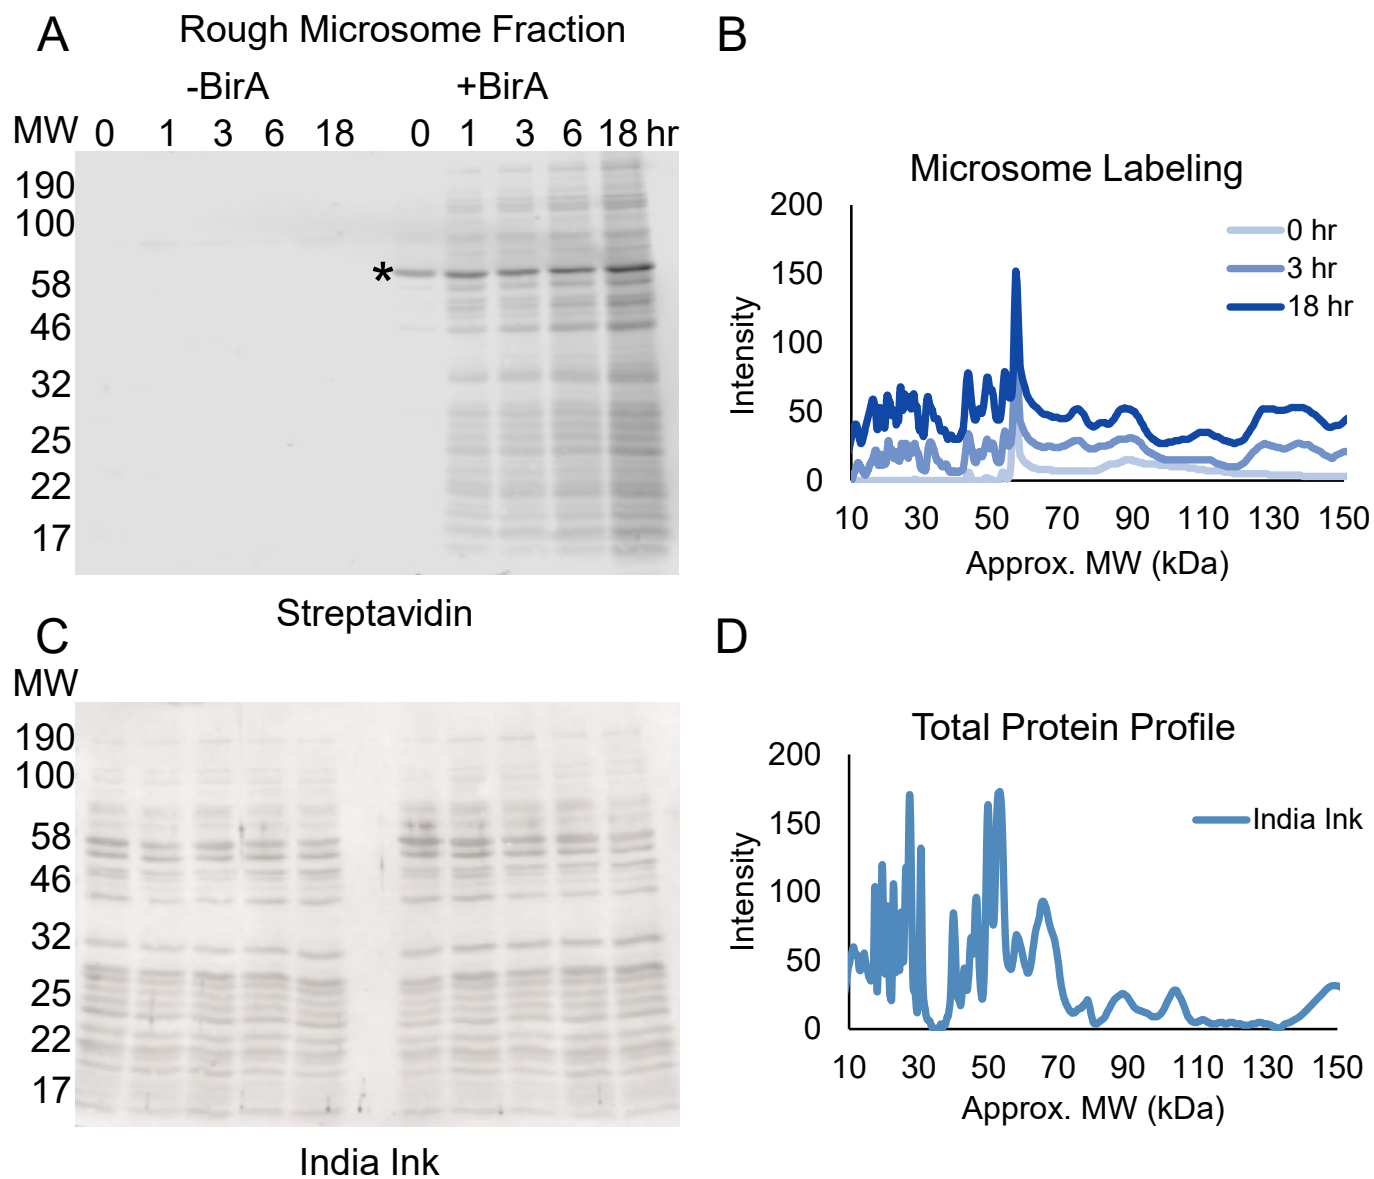

A

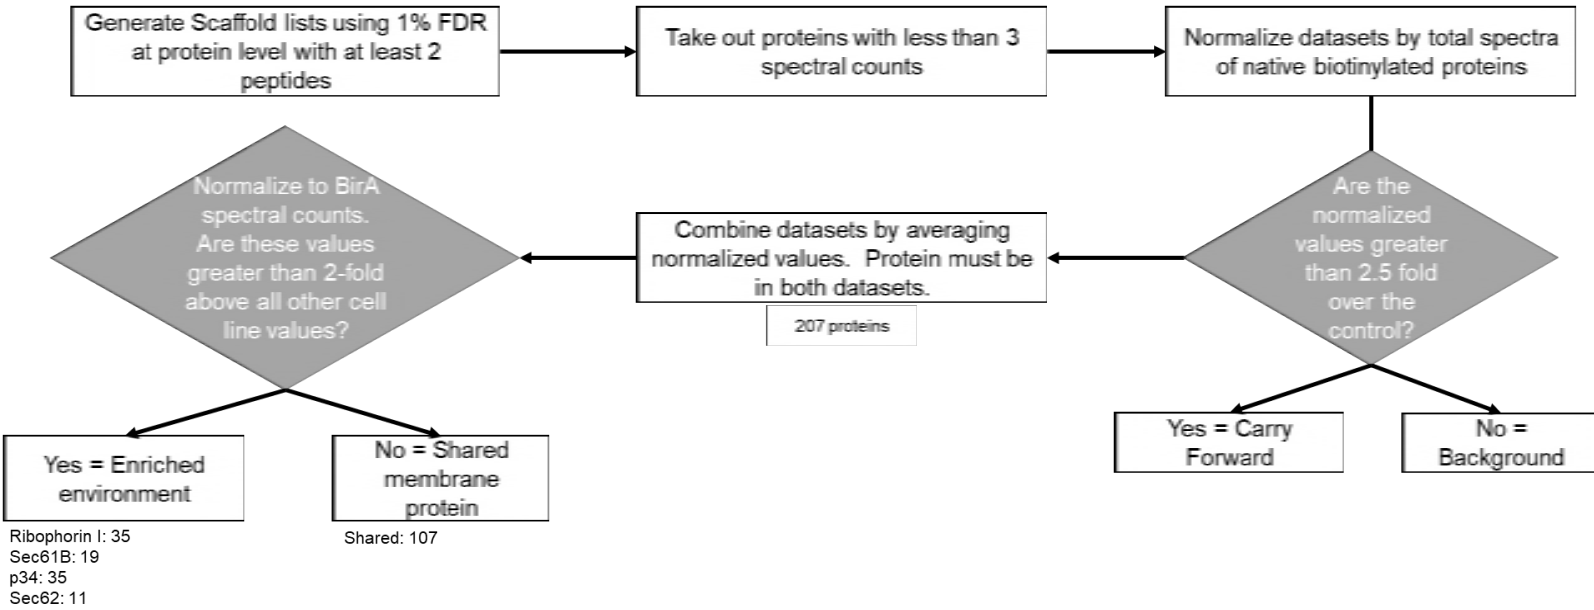

B

### Subcellular Localization by GeneID

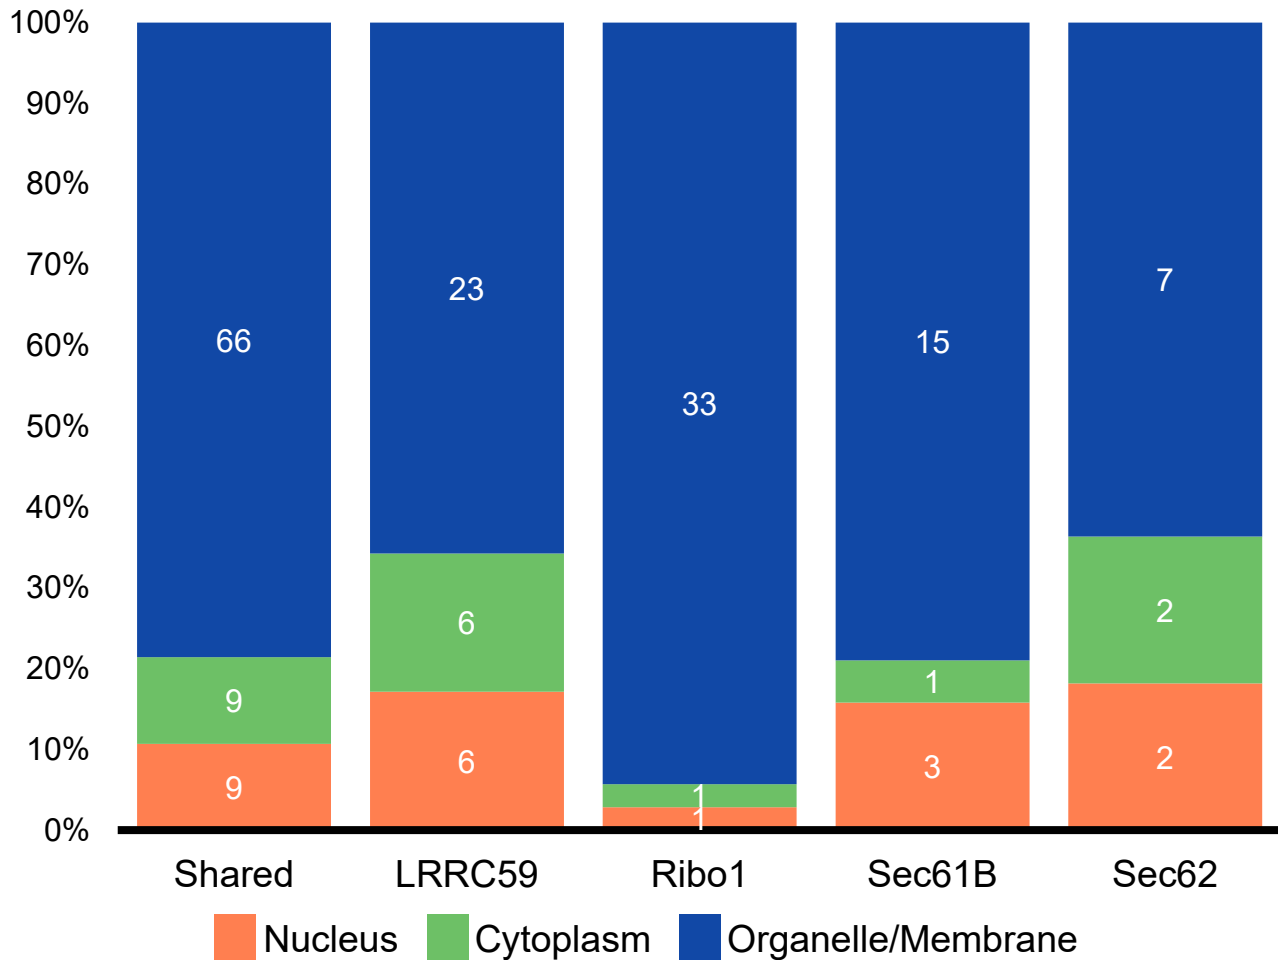

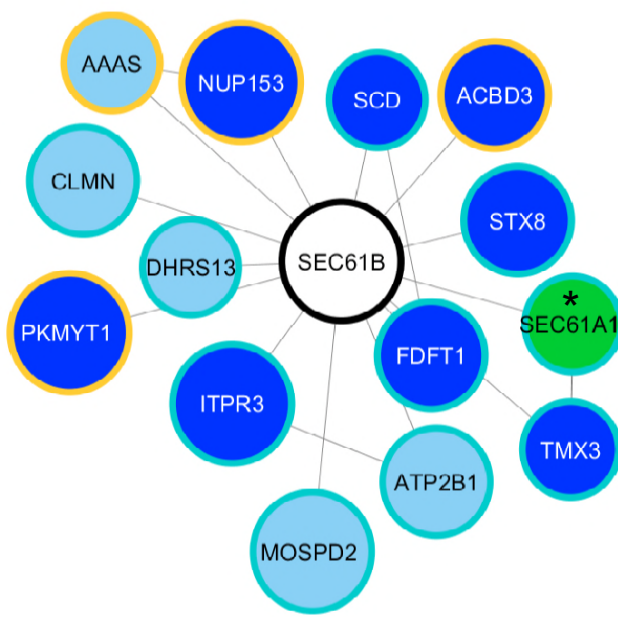

GO: Organelle Membrane

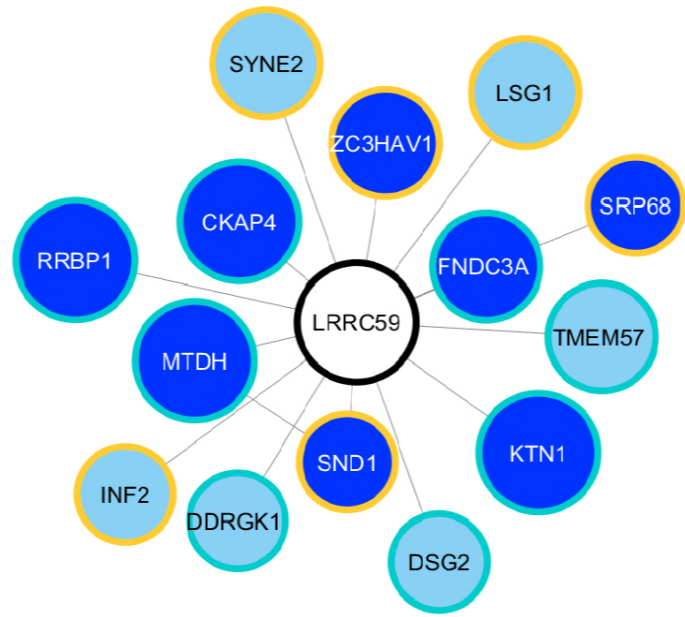

GO: Poly(A)RNA-binding

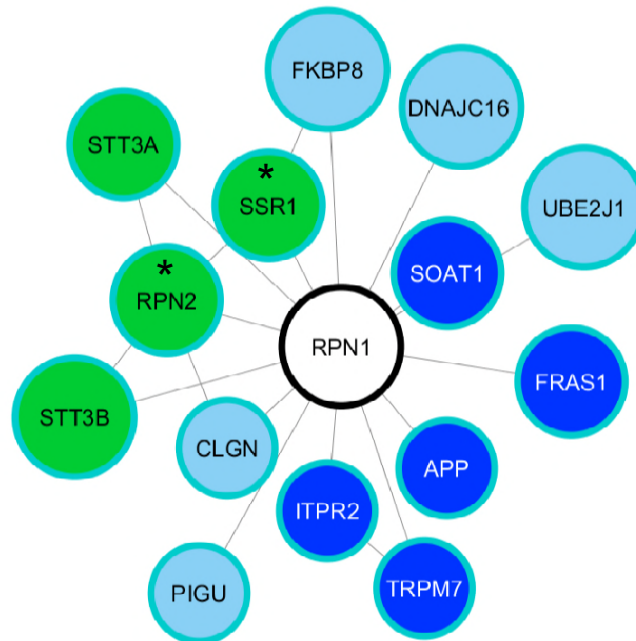

GO: Transport

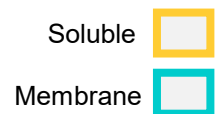

| BioID Cell Line | Top GO Enrichment   | FDR                |
|-----------------|---------------------|--------------------|
| LRRC59          | Poly(A) RNA-Binding | $7 \times 10^{-5}$ |
| Sec61 $\beta$   | Organelle Membrane  | $1 \times 10^{-4}$ |
| Ribophorin I    | Transport           | $9 \times 10^{-3}$ |

A

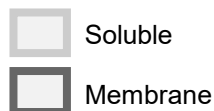

### RPN1-SEC61B-LRRC59 Shared Proteins

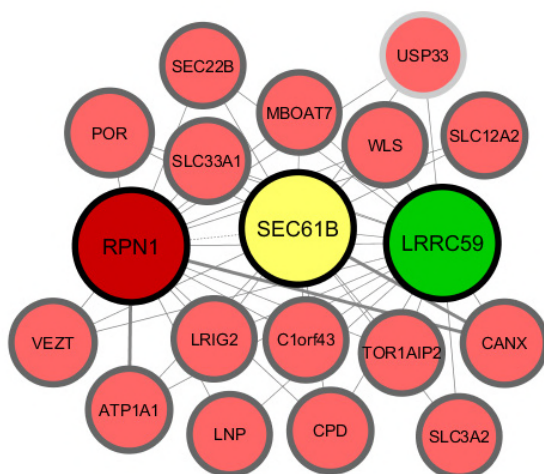

B

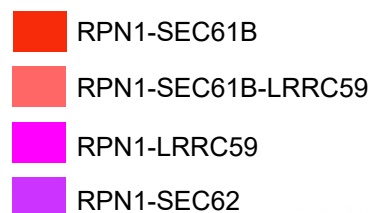

### All Shared Proteins

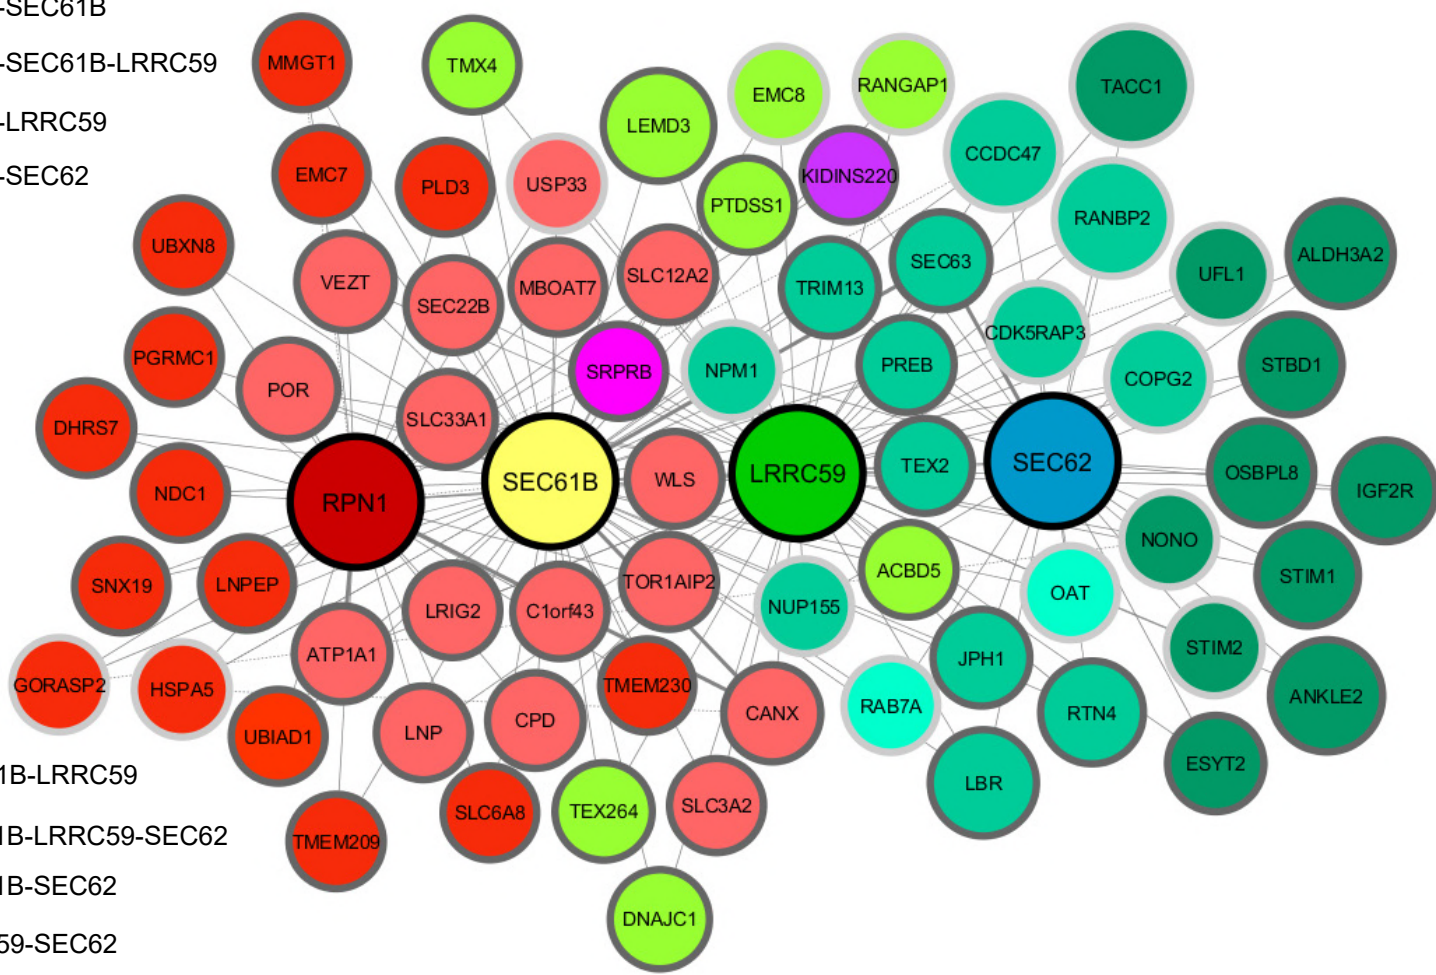

**Figure 9** **Formylated Nicotiana**

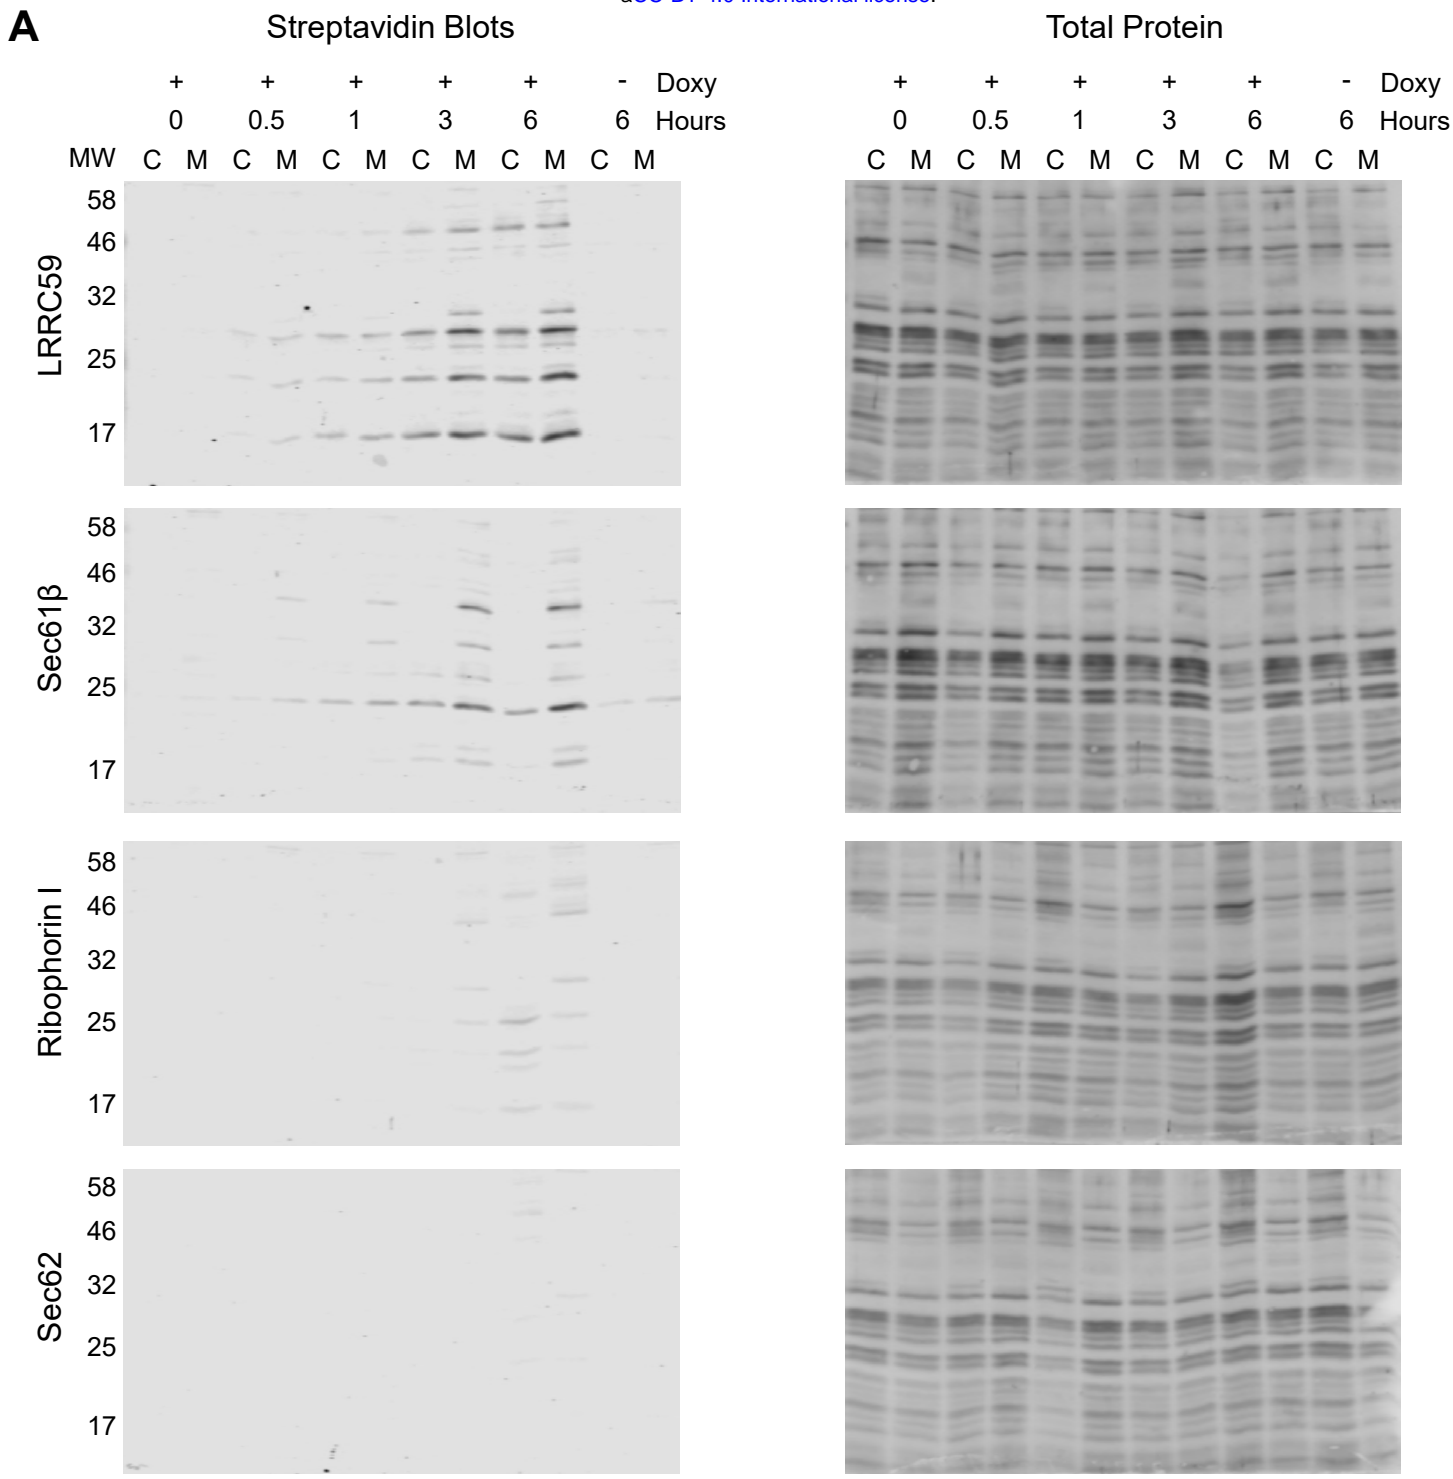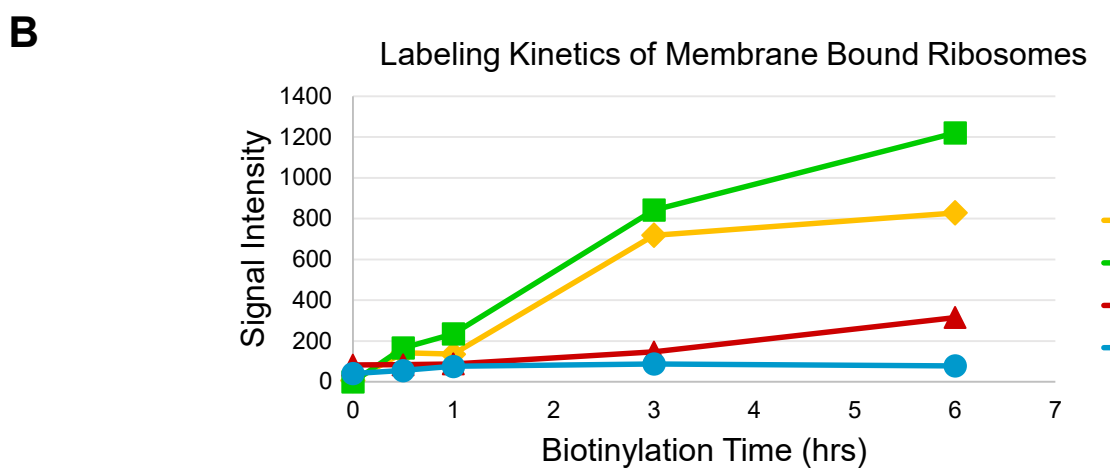

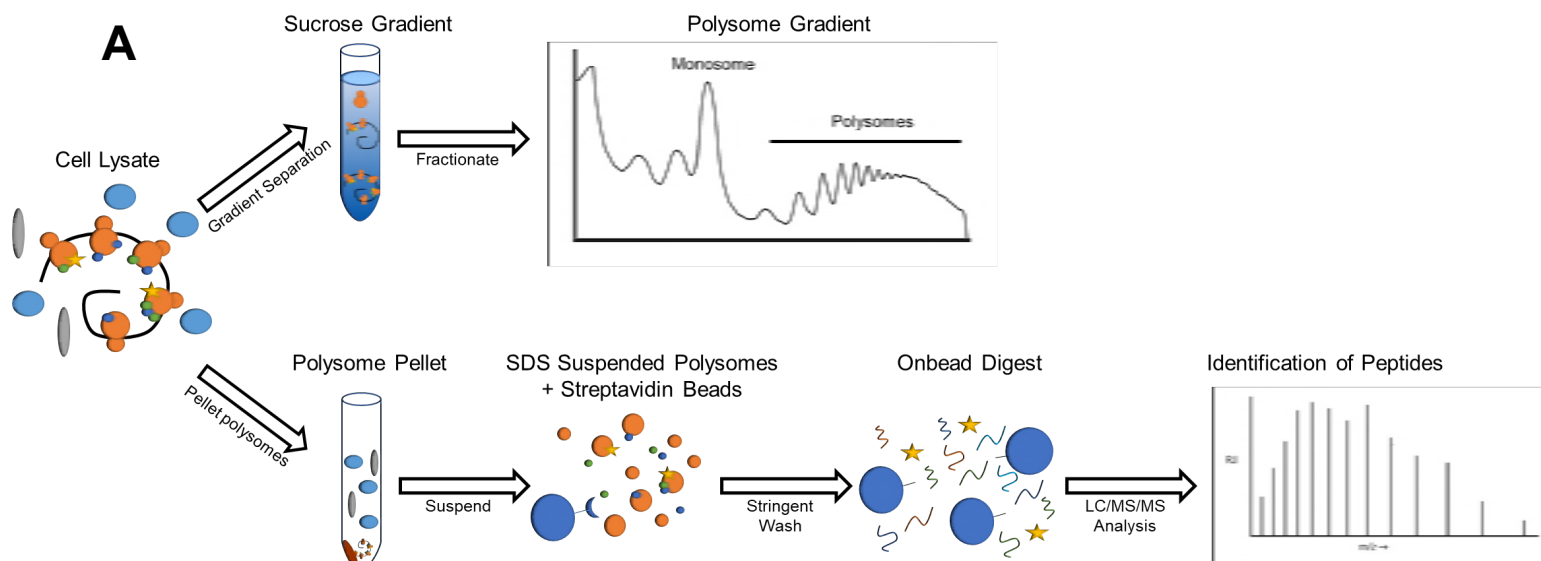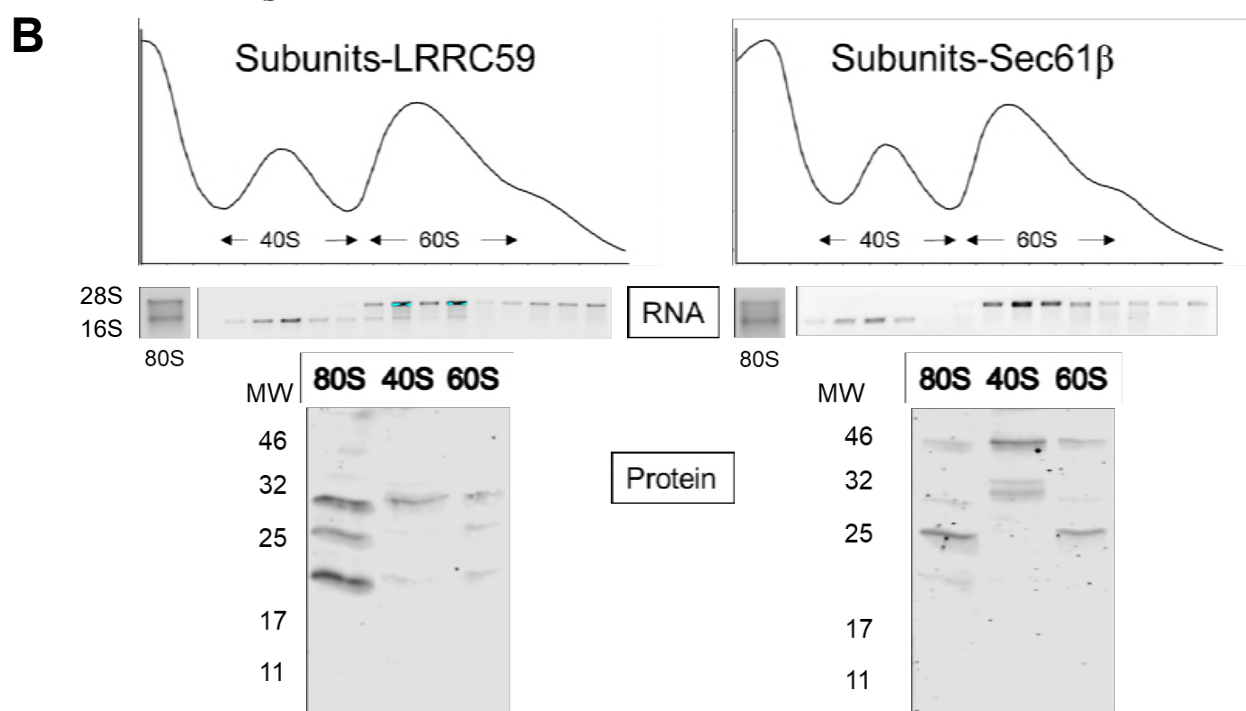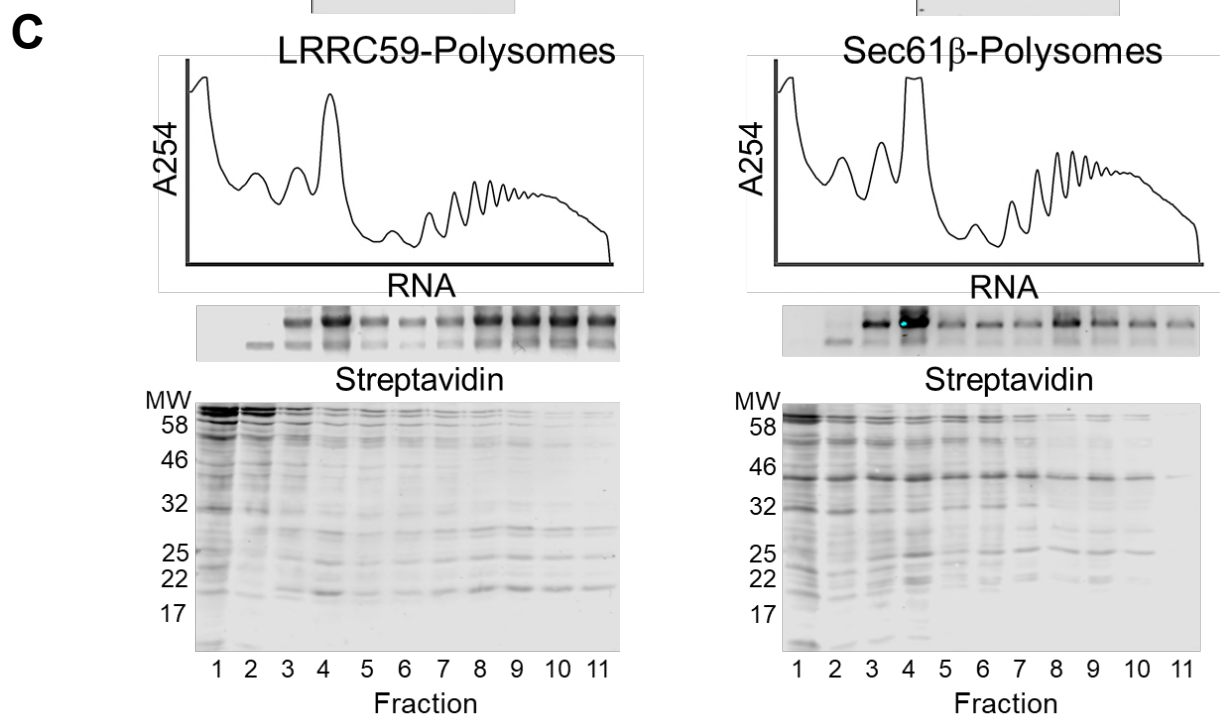

A

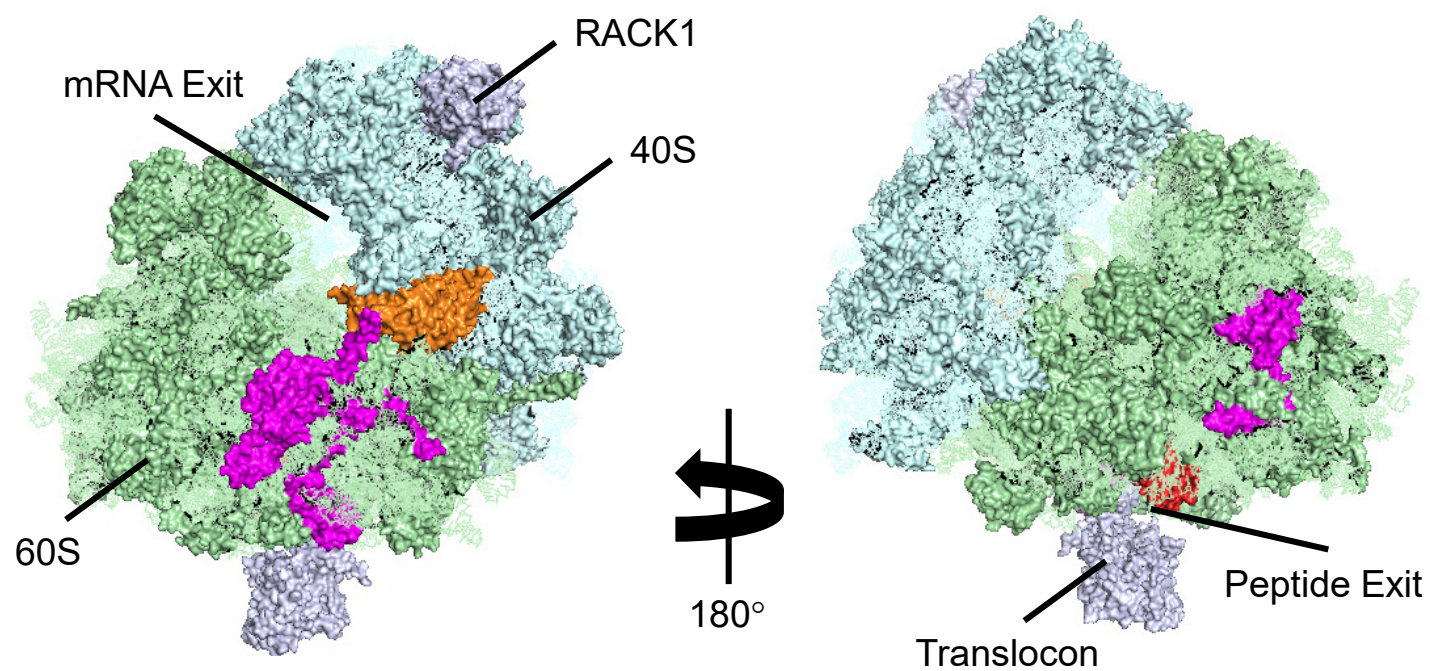

B

| Dataset Enriched in: | MW (kDa) | Ribosomal Protein | Color     |
|----------------------|----------|-------------------|-----------|
| LRRC59               | 30       | S3A               | Orange    |
| Sec61 $\beta$        | 21       | L17               | Red       |
| Shared               | 30       | L7a               | Magenta   |
| Shared               | 23       | L14               | Magenta   |
| Shared               | 18       | L23a              | Magenta   |
| Shared               | 12       | LA2               | Not shown |



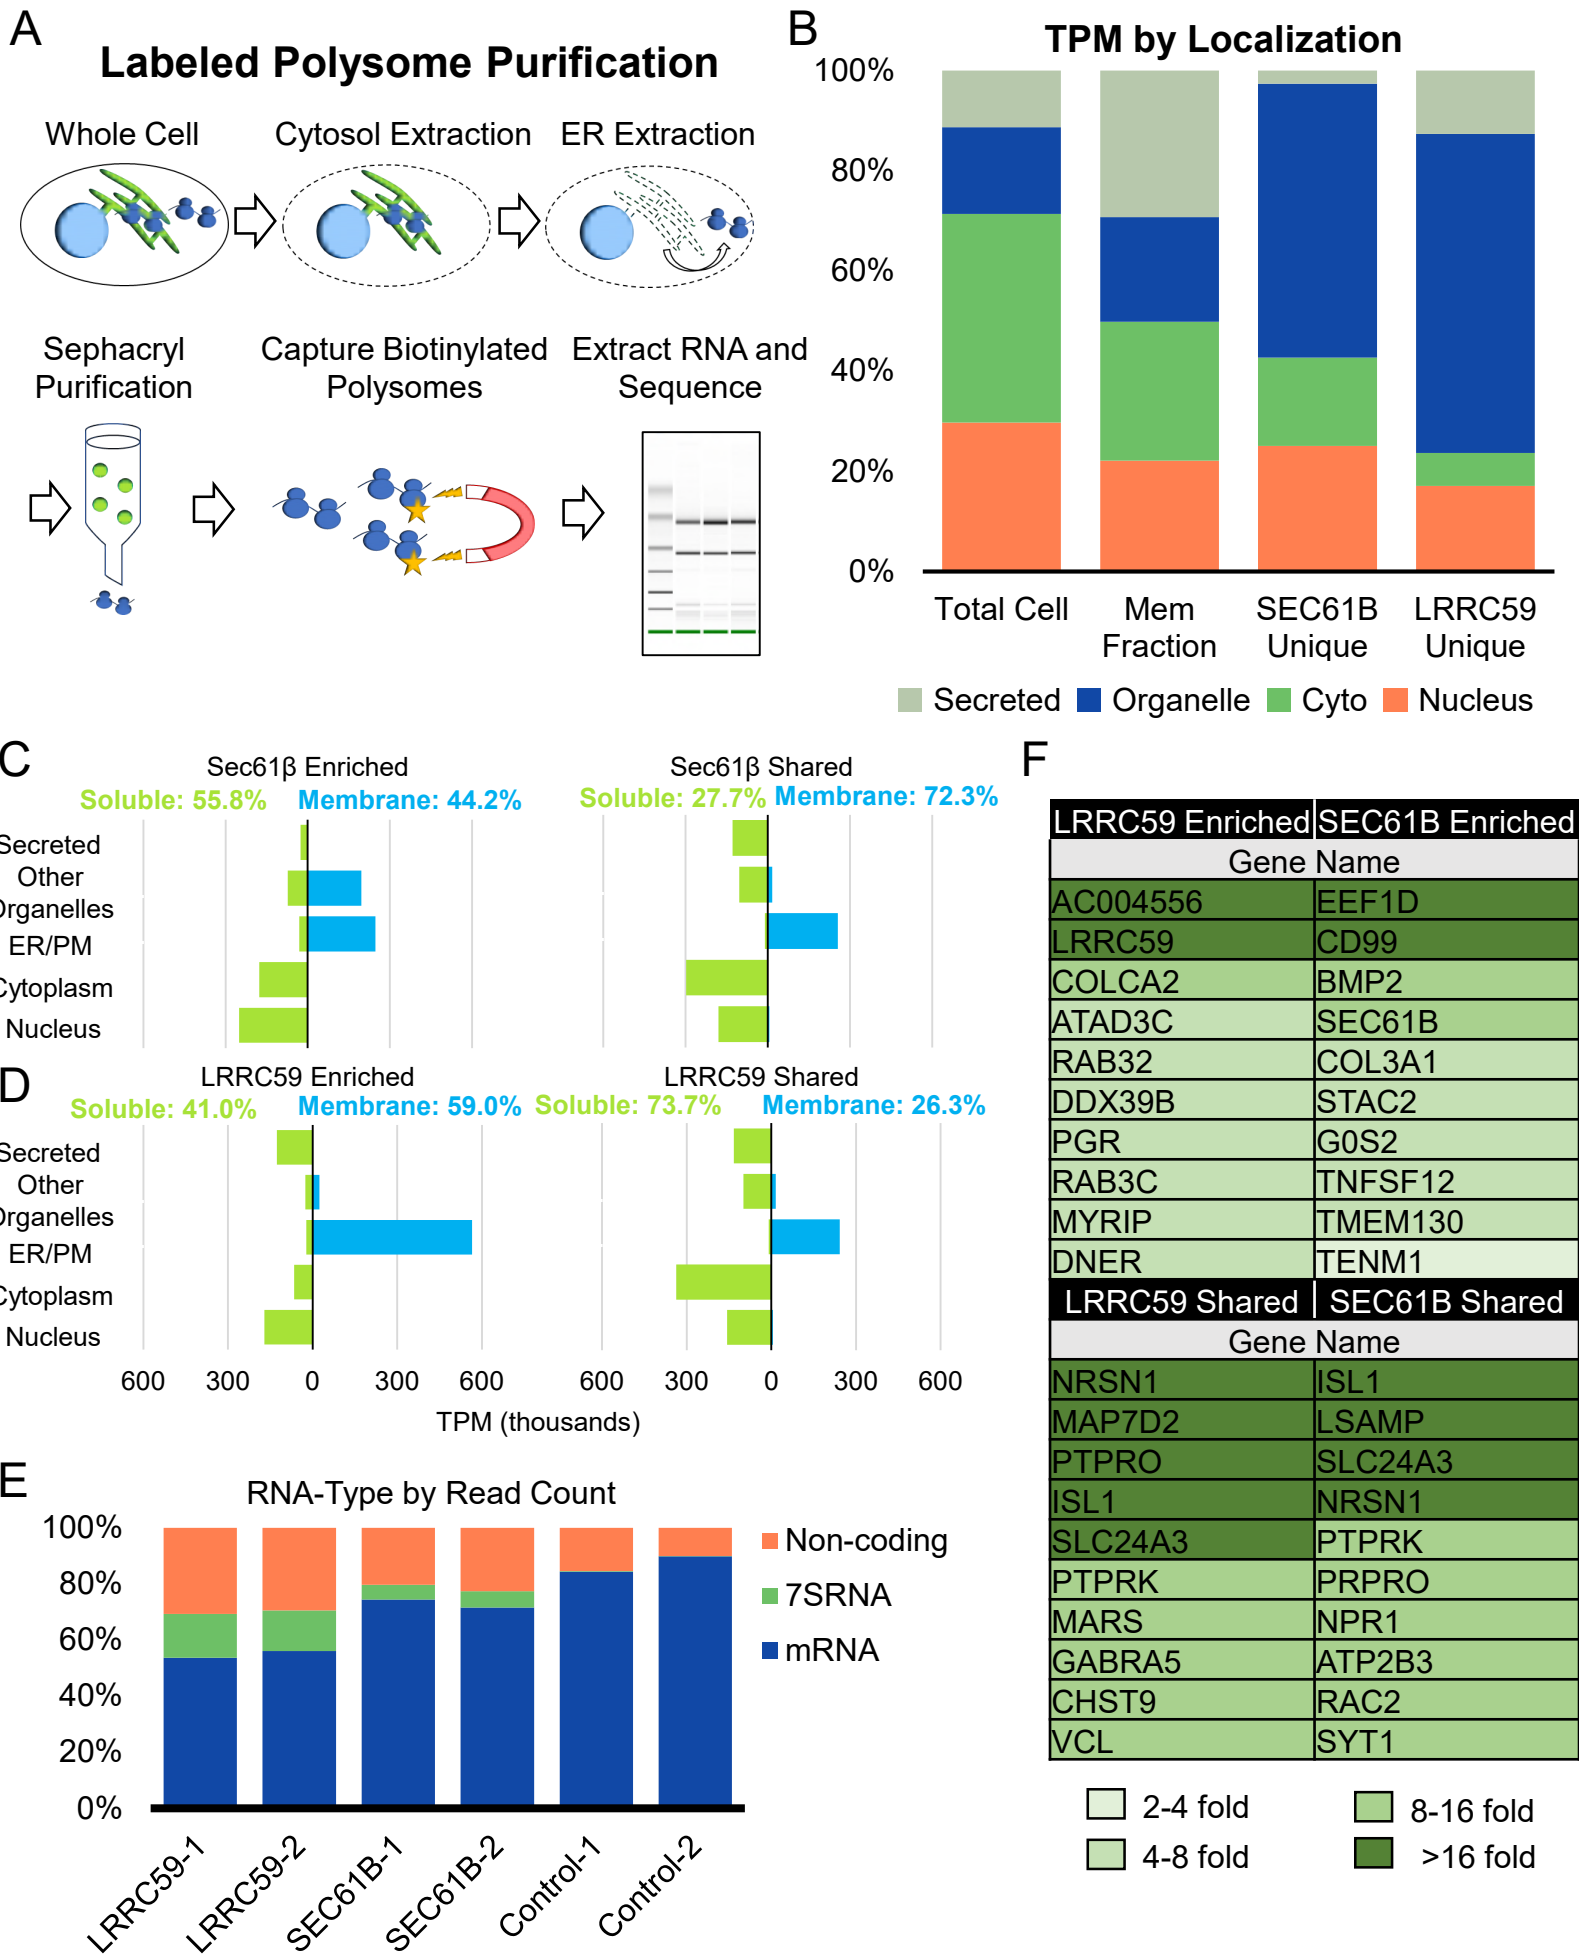

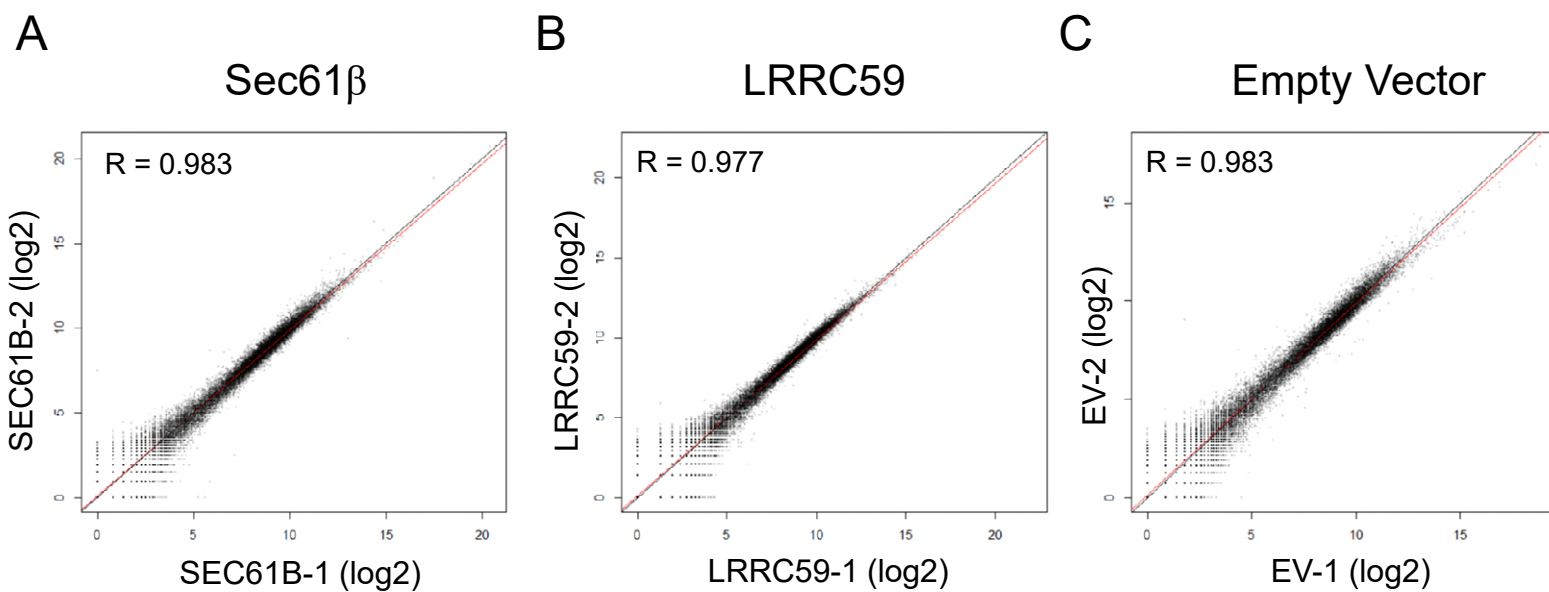

**D**

| Sample         | BirA Raw Counts |
|----------------|-----------------|
| SEC61B-1       | 18059           |
| SEC61B-2       | 5621            |
| LRRC59-1       | 15761           |
| LRRC59-2       | 16236           |
| Empty Vector-1 | 175             |
| Empty Vector-2 | 142             |

Table 1: GeneID Unique and Shared

| Dataset             | GO Term                 | FDR                    |
|---------------------|-------------------------|------------------------|
| Shared (306)        | System development      | 3.31x10 <sup>-11</sup> |
|                     | Membrane                | 3.87x10 <sup>-12</sup> |
| LRRC59 Unique (145) | Calcium ion binding     | 4.77x10 <sup>-2</sup>  |
|                     | Plasma membrane         | 2.03x10 <sup>-2</sup>  |
| SEC61B Unique (155) | Regulation of signaling | 1.60x10 <sup>-3</sup>  |
|                     | Endoplasmic reticulum   | 3.60x10 <sup>-4</sup>  |

Table 2: GeneID TPM Enriched Subcellular Components

| Dataset                | GO Term                              | FDR                   |
|------------------------|--------------------------------------|-----------------------|
| LRRC59 – Cell membrane | Cell-cell signaling                  | 3.37x10 <sup>-2</sup> |
| LRRC59 – Extracellular | Extracellular matrix organization    | 2.25x10 <sup>-4</sup> |
| SEC61B – Nucleus       | Negative regulation of transcription | 4.07x10 <sup>-2</sup> |
| SEC61B – Cytosol       | Neurotrophin signaling pathway       | 5.99x10 <sup>-4</sup> |
| LRRC59-mitochondria    | Electron transport                   | 4.63x10 <sup>-4</sup> |
| SEC61B-mitochondria    | Mitochondrial membrane               | 6.34x10 <sup>-7</sup> |
| Shared – mitochondria  | Mitochondrial matrix                 | 3.27x10 <sup>-2</sup> |
